# Supplementary material
Source: publisher figshare collection journal article supplement (https://acs.figshare.com/ndownloader/files/4154203)
Supplement: Supplementary file 1 [file 4154203]

#==============================================================================

# 1. SUBMISSION DETAILS

data_global

_publ_contact_author
;
        Peter G. Jones (for X-ray details)
        Institut f\"ur Anorganische und Analytische Chemie
        Technische Universit\"at Braunschweig
        Postfach 3329
        38023 Braunschweig
        Germany
;
_publ_contact_author_phone        '049 531 391-5382'
_publ_contact_author_fax          '049 531 391-5387'
_publ_contact_author_email        p.jones@tu-bs.de
_publ_requested_journal           Organometallics

#==============================================================================

# 3. TITLE AND AUTHOR LIST

_publ_section_title
;
 Flexibility of an open indenyl ligand in iron(II) complexes
;

loop_
 _publ_author_name
 _publ_author_address
     'Gl\"ockner, Andreas'
;     Institut f\"ur Anorganische und Analytische Chemie
      Technische Universit\"at Braunschweig
      Postfach 3329
      38023 Braunschweig
      Germany
;
     'Bannenberg, Thomas'
;     Institut f\"ur Anorganische und Analytische Chemie
      Technische Universit\"at Braunschweig
      Postfach 3329
      38023 Braunschweig
      Germany
;
     'Ibrom, Kerstin'
;     NMR-Labor der Chemischen Institute
      Technische Universit\"at Braunschweig
      Postfach 3329
      38023 Braunschweig
      Germany
;
     'Daniliuc, Constantin G.'
;     Institut f\"ur Anorganische und Analytische Chemie
      Technische Universit\"at Braunschweig
      Postfach 3329
      38023 Braunschweig
      Germany
;
     'Freytag, Matthias'
;     Institut f\"ur Anorganische und Analytische Chemie
      Technische Universit\"at Braunschweig
      Postfach 3329
      38023 Braunschweig
      Germany
;
     'Jones, Peter G.'
;     Institut f\"ur Anorganische und Analytische Chemie
      Technische Universit\"at Braunschweig
      Postfach 3329
      38023 Braunschweig
      Germany
;
     'Walter, Marc D.'
;     Institut f\"ur Anorganische und Analytische Chemie
      Technische Universit\"at Braunschweig
      Postfach 3329
      38023 Braunschweig
      Germany
;
     'Tamm, Matthias'
;     Institut f\"ur Anorganische und Analytische Chemie
      Technische Universit\"at Braunschweig
      Postfach 3329
      38023 Braunschweig
      Germany
;
#=============================================================================
#  cif data for "andyg48" (compound 1)
#=============================================================================


data_andyg48

_audit_creation_method            SHELXL-97
_chemical_name_systematic
;
 ?
;
_chemical_name_common             ?
_chemical_melting_point           ?
_chemical_formula_moiety          ?
_chemical_formula_sum
 'C20 H26 Fe'
_chemical_formula_weight          322.26

loop_
 _atom_type_symbol
 _atom_type_description
 _atom_type_scat_dispersion_real
 _atom_type_scat_dispersion_imag
 _atom_type_scat_source
 'C'  'C'   0.0181   0.0091
 'International Tables Vol C Tables 4.2.6.8 and 6.1.1.4'
 'H'  'H'   0.0000   0.0000
 'International Tables Vol C Tables 4.2.6.8 and 6.1.1.4'
 'Fe'  'Fe'  -1.1336   3.1974
 'International Tables Vol C Tables 4.2.6.8 and 6.1.1.4'

_symmetry_cell_setting            monoclinic
_symmetry_space_group_name_H-M    'P 21/c'

loop_
 _symmetry_equiv_pos_as_xyz
 'x, y, z'
 '-x, y+1/2, -z+1/2'
 '-x, -y, -z'
 'x, -y-1/2, z-1/2'

_cell_length_a                    13.5328(8)
_cell_length_b                    6.8730(4)
_cell_length_c                    17.8642(12)
_cell_angle_alpha                 90.00
_cell_angle_beta                  104.134(6)
_cell_angle_gamma                 90.00
_cell_volume                      1611.27(17)
_cell_formula_units_Z             4
_cell_measurement_temperature     100(2)
_cell_measurement_reflns_used     10007
_cell_measurement_theta_min       3.3650
_cell_measurement_theta_max       75.8488

_exptl_crystal_description        needle
_exptl_crystal_colour             'dark red'
_exptl_crystal_size_max           0.07
_exptl_crystal_size_mid           0.06
_exptl_crystal_size_min           0.03
_exptl_crystal_density_meas       ?
_exptl_crystal_density_diffrn     1.328
_exptl_crystal_density_method     'not measured'
_exptl_crystal_F_000              688
_exptl_absorpt_coefficient_mu     7.402
_exptl_absorpt_correction_type    multi-scan
_exptl_absorpt_correction_T_min   0.63221
_exptl_absorpt_correction_T_max   1.00000
_exptl_absorpt_process_details
;
CrysAlisPro, Oxford Diffraction Ltd.,
Version 1.171.33.55 (release 05-01-2010 CrysAlis171 .NET)
(compiled Jan  5 2010,16:28:46)
;

_exptl_special_details
;
 ?
;

_diffrn_ambient_temperature       100(2)
_diffrn_radiation_wavelength      1.54184
_diffrn_radiation_type            'Cu K\a'
_diffrn_radiation_source          'Nova (Cu) X-ray Source'
_diffrn_radiation_monochromator   mirror
_diffrn_measurement_device_type   'Oxford Diffraction Xcalibur, Atlas, Nova'
_diffrn_measurement_method        '\w scans'
_diffrn_detector_area_resol_mean  10.3543
_diffrn_standards_number          ?
_diffrn_standards_interval_count  ?
_diffrn_standards_interval_time   ?
_diffrn_standards_decay_%         ?
_diffrn_reflns_number             22699
_diffrn_reflns_av_R_equivalents   0.0567
_diffrn_reflns_av_sigmaI/netI     0.0308
_diffrn_reflns_limit_h_min        -16
_diffrn_reflns_limit_h_max        16
_diffrn_reflns_limit_k_min        -8
_diffrn_reflns_limit_k_max        8
_diffrn_reflns_limit_l_min        -22
_diffrn_reflns_limit_l_max        22
_diffrn_reflns_theta_min          3.37
_diffrn_reflns_theta_max          76.04
_reflns_number_total              3319
_reflns_number_gt                 2711
_reflns_threshold_expression      >2sigma(I)

_computing_data_collection
;
CrysAlisPro, Oxford Diffraction Ltd.,
Version 1.171.33.55 (release 05-01-2010 CrysAlis171 .NET)
(compiled Jan  5 2010,16:28:46)
;
_computing_cell_refinement
;
CrysAlisPro, Oxford Diffraction Ltd.,
Version 1.171.33.55 (release 05-01-2010 CrysAlis171 .NET)
(compiled Jan  5 2010,16:28:46)
;
_computing_data_reduction
;
CrysAlisPro, Oxford Diffraction Ltd.,
Version 1.171.33.55 (release 05-01-2010 CrysAlis171 .NET)
(compiled Jan  5 2010,16:28:46)
;
_computing_structure_solution     'SHELXS-97 (Sheldrick, 1990)'
_computing_structure_refinement   'SHELXL-97 (Sheldrick, 1997)'
_computing_molecular_graphics     'BRUKER XP'
_computing_publication_material   'SHELXL-97'

_refine_special_details
;
 Refinement of F^2^ against ALL reflections.  The weighted R-factor wR and
 goodness of fit S are based on F^2^, conventional R-factors R are based
 on F, with F set to zero for negative F^2^. The threshold expression of
 F^2^ > 2sigma(F^2^) is used only for calculating R-factors(gt) etc. and is
 not relevant to the choice of reflections for refinement.  R-factors based
 on F^2^ are statistically about twice as large as those based on F, and R-
 factors based on ALL data will be even larger.

 The hydrogens of the C1, C3 and C5 atoms were refined freely.
;

_refine_ls_structure_factor_coef  Fsqd
_refine_ls_matrix_type            full
_refine_ls_weighting_scheme       calc
_refine_ls_weighting_details
 'calc w=1/[\s^2^(Fo^2^)+(0.0643P)^2^] where P=(Fo^2^+2Fc^2^)/3'
_atom_sites_solution_primary      direct
_atom_sites_solution_secondary    difmap
_atom_sites_solution_hydrogens    geom
_refine_ls_hydrogen_treatment     mixed
_refine_ls_extinction_method      none
_refine_ls_extinction_coef        ?
_refine_ls_number_reflns          3319
_refine_ls_number_parameters      212
_refine_ls_number_restraints      0
_refine_ls_R_factor_all           0.0468
_refine_ls_R_factor_gt            0.0369
_refine_ls_wR_factor_ref          0.0990
_refine_ls_wR_factor_gt           0.0952
_refine_ls_goodness_of_fit_ref    1.042
_refine_ls_restrained_S_all       1.042
_refine_ls_shift/su_max           0.001
_refine_ls_shift/su_mean          0.000

loop_
 _atom_site_label
 _atom_site_type_symbol
 _atom_site_fract_x
 _atom_site_fract_y
 _atom_site_fract_z
 _atom_site_U_iso_or_equiv
 _atom_site_adp_type
 _atom_site_occupancy
 _atom_site_symmetry_multiplicity
 _atom_site_calc_flag
 _atom_site_refinement_flags
 _atom_site_disorder_assembly
 _atom_site_disorder_group
Fe Fe 0.27838(2) 0.38714(5) 0.609764(18) 0.01856(11) Uani 1 1 d . . .
C1 C 0.38197(17) 0.5948(3) 0.59070(14) 0.0266(5) Uani 1 1 d . . .
H1A H 0.396(2) 0.693(4) 0.6290(16) 0.032(7) Uiso 1 1 d . . .
H1B H 0.442(2) 0.546(5) 0.5736(17) 0.044(8) Uiso 1 1 d . . .
C2 C 0.29066(17) 0.5984(3) 0.53058(13) 0.0250(4) Uani 1 1 d . . .
C3 C 0.19288(16) 0.6045(3) 0.54603(13) 0.0236(4) Uani 1 1 d . . .
H3 H 0.130(2) 0.589(4) 0.5004(16) 0.036(8) Uiso 1 1 d . . .
C4 C 0.17025(16) 0.6022(3) 0.62013(13) 0.0225(4) Uani 1 1 d . . .
C5 C 0.24708(17) 0.6160(3) 0.69133(13) 0.0244(4) Uani 1 1 d . . .
H5 H 0.3081(19) 0.694(4) 0.6942(14) 0.025(7) Uiso 1 1 d . . .
C6 C 0.21693(18) 0.5867(3) 0.76169(13) 0.0290(5) Uani 1 1 d . . .
H6 H 0.2675 0.5912 0.8091 0.035 Uiso 1 1 calc R . .
C7 C 0.11841(19) 0.5524(4) 0.76343(15) 0.0335(5) Uani 1 1 d . . .
H7 H 0.1010 0.5328 0.8113 0.040 Uiso 1 1 calc R . .
C8 C 0.04170(18) 0.5462(4) 0.69285(15) 0.0312(5) Uani 1 1 d . . .
H8 H -0.0275 0.5265 0.6938 0.037 Uiso 1 1 calc R . .
C9 C 0.06668(16) 0.5681(3) 0.62487(14) 0.0273(5) Uani 1 1 d . . .
H9 H 0.0145 0.5609 0.5785 0.033 Uiso 1 1 calc R . .
C10 C 0.2939(2) 0.5732(4) 0.44732(14) 0.0341(5) Uani 1 1 d . . .
H10A H 0.2369 0.4909 0.4208 0.051 Uiso 1 1 calc R . .
H10B H 0.3583 0.5115 0.4449 0.051 Uiso 1 1 calc R . .
H10C H 0.2886 0.7007 0.4221 0.051 Uiso 1 1 calc R . .
C11 C 0.32755(16) 0.1451(3) 0.56140(13) 0.0225(4) Uani 1 1 d . . .
C12 C 0.22166(16) 0.1270(3) 0.55821(12) 0.0212(4) Uani 1 1 d . . .
C13 C 0.20956(16) 0.1294(3) 0.63487(13) 0.0213(4) Uani 1 1 d . . .
C14 C 0.30870(17) 0.1511(3) 0.68617(12) 0.0231(4) Uani 1 1 d . . .
C15 C 0.38150(16) 0.1608(3) 0.64156(13) 0.0240(4) Uani 1 1 d . . .
C16 C 0.37649(19) 0.1247(4) 0.49515(14) 0.0312(5) Uani 1 1 d . . .
H16A H 0.3989 -0.0100 0.4922 0.047 Uiso 1 1 calc R . .
H16B H 0.4354 0.2119 0.5029 0.047 Uiso 1 1 calc R . .
H16C H 0.3272 0.1590 0.4470 0.047 Uiso 1 1 calc R . .
C17 C 0.13850(17) 0.0969(3) 0.48601(13) 0.0290(5) Uani 1 1 d . . .
H17A H 0.1337 -0.0417 0.4727 0.043 Uiso 1 1 calc R . .
H17B H 0.1542 0.1713 0.4436 0.043 Uiso 1 1 calc R . .
H17C H 0.0734 0.1413 0.4948 0.043 Uiso 1 1 calc R . .
C18 C 0.11267(18) 0.0960(3) 0.65950(15) 0.0292(5) Uani 1 1 d . . .
H18A H 0.0544 0.1327 0.6175 0.044 Uiso 1 1 calc R . .
H18B H 0.1129 0.1752 0.7052 0.044 Uiso 1 1 calc R . .
H18C H 0.1073 -0.0419 0.6720 0.044 Uiso 1 1 calc R . .
C19 C 0.33015(19) 0.1458(4) 0.77251(13) 0.0315(5) Uani 1 1 d . . .
H19A H 0.3331 0.0103 0.7900 0.047 Uiso 1 1 calc R . .
H19B H 0.2758 0.2142 0.7894 0.047 Uiso 1 1 calc R . .
H19C H 0.3956 0.2095 0.7946 0.047 Uiso 1 1 calc R . .
C20 C 0.49493(17) 0.1705(4) 0.67172(16) 0.0348(6) Uani 1 1 d . . .
H20A H 0.5115 0.2495 0.7188 0.052 Uiso 1 1 calc R . .
H20B H 0.5253 0.2295 0.6327 0.052 Uiso 1 1 calc R . .
H20C H 0.5221 0.0388 0.6834 0.052 Uiso 1 1 calc R . .

loop_
 _atom_site_aniso_label
 _atom_site_aniso_U_11
 _atom_site_aniso_U_22
 _atom_site_aniso_U_33
 _atom_site_aniso_U_23
 _atom_site_aniso_U_13
 _atom_site_aniso_U_12
Fe 0.01585(16) 0.02053(18) 0.01815(17) 0.00098(13) 0.00195(11) 0.00062(12)
C1 0.0254(11) 0.0254(11) 0.0289(12) 0.0012(9) 0.0062(9) -0.0055(9)
C2 0.0302(11) 0.0215(11) 0.0237(11) 0.0040(8) 0.0074(9) -0.0018(8)
C3 0.0242(10) 0.0199(10) 0.0239(10) 0.0021(8) 0.0003(8) 0.0019(8)
C4 0.0230(10) 0.0175(10) 0.0257(11) 0.0014(8) 0.0036(8) 0.0052(8)
C5 0.0212(10) 0.0214(10) 0.0287(11) -0.0050(9) 0.0022(8) 0.0022(8)
C6 0.0307(12) 0.0301(12) 0.0240(11) -0.0049(9) 0.0023(9) 0.0030(9)
C7 0.0368(13) 0.0356(13) 0.0309(12) -0.0012(10) 0.0140(10) 0.0065(10)
C8 0.0220(11) 0.0310(12) 0.0421(14) -0.0037(10) 0.0107(10) 0.0031(9)
C9 0.0166(10) 0.0263(11) 0.0355(12) -0.0036(9) -0.0006(8) 0.0045(8)
C10 0.0443(14) 0.0351(13) 0.0244(12) 0.0040(10) 0.0110(10) 0.0000(11)
C11 0.0217(10) 0.0198(10) 0.0260(11) -0.0001(8) 0.0057(8) 0.0041(8)
C12 0.0189(10) 0.0186(10) 0.0233(10) 0.0007(8) 0.0000(8) -0.0011(7)
C13 0.0196(10) 0.0175(10) 0.0265(10) 0.0020(8) 0.0050(8) -0.0004(8)
C14 0.0267(11) 0.0185(10) 0.0221(10) 0.0035(8) 0.0019(8) 0.0019(8)
C15 0.0205(10) 0.0218(10) 0.0266(11) 0.0031(8) -0.0002(8) 0.0030(8)
C16 0.0312(12) 0.0337(13) 0.0325(12) 0.0010(10) 0.0153(10) 0.0042(10)
C17 0.0274(11) 0.0270(11) 0.0269(11) -0.0007(9) -0.0042(9) -0.0005(9)
C18 0.0266(11) 0.0261(11) 0.0379(13) 0.0007(10) 0.0138(9) -0.0008(9)
C19 0.0390(13) 0.0325(13) 0.0202(11) 0.0039(9) 0.0020(9) 0.0026(10)
C20 0.0184(11) 0.0359(13) 0.0454(15) 0.0055(11) -0.0011(10) 0.0028(9)

_geom_special_details
;
 All esds (except the esd in the dihedral angle between two l.s. planes)
 are estimated using the full covariance matrix.  The cell esds are taken
 into account individually in the estimation of esds in distances, angles
 and torsion angles; correlations between esds in cell parameters are only
 used when they are defined by crystal symmetry.  An approximate (isotropic)
 treatment of cell esds is used for estimating esds involving l.s. planes.
;

loop_
 _geom_bond_atom_site_label_1
 _geom_bond_atom_site_label_2
 _geom_bond_distance
 _geom_bond_site_symmetry_2
 _geom_bond_publ_flag
Fe C3 2.055(2) . ?
Fe C11 2.058(2) . ?
Fe C2 2.062(2) . ?
Fe C12 2.071(2) . ?
Fe C15 2.075(2) . ?
Fe C1 2.086(2) . ?
Fe C14 2.095(2) . ?
Fe C13 2.100(2) . ?
Fe C4 2.119(2) . ?
Fe C5 2.254(2) . ?
C1 C2 1.426(3) . ?
C2 C3 1.417(3) . ?
C2 C10 1.509(3) . ?
C3 C4 1.430(3) . ?
C4 C5 1.436(3) . ?
C4 C9 1.444(3) . ?
C5 C6 1.427(3) . ?
C6 C7 1.362(3) . ?
C7 C8 1.425(3) . ?
C8 C9 1.346(3) . ?
C11 C12 1.425(3) . ?
C11 C15 1.444(3) . ?
C11 C16 1.497(3) . ?
C12 C13 1.418(3) . ?
C12 C17 1.505(3) . ?
C13 C14 1.436(3) . ?
C13 C18 1.499(3) . ?
C14 C15 1.412(3) . ?
C14 C19 1.498(3) . ?
C15 C20 1.499(3) . ?

loop_
 _geom_angle_atom_site_label_1
 _geom_angle_atom_site_label_2
 _geom_angle_atom_site_label_3
 _geom_angle
 _geom_angle_site_symmetry_1
 _geom_angle_site_symmetry_3
 _geom_angle_publ_flag
C3 Fe C11 123.42(9) . . ?
C3 Fe C2 40.26(9) . . ?
C11 Fe C2 101.11(9) . . ?
C3 Fe C12 106.49(8) . . ?
C11 Fe C12 40.39(8) . . ?
C2 Fe C12 112.72(9) . . ?
C3 Fe C15 161.25(9) . . ?
C11 Fe C15 40.89(8) . . ?
C2 Fe C15 123.67(9) . . ?
C12 Fe C15 68.02(8) . . ?
C3 Fe C1 73.86(9) . . ?
C11 Fe C1 100.69(9) . . ?
C2 Fe C1 40.20(9) . . ?
C12 Fe C1 135.15(9) . . ?
C15 Fe C1 97.12(9) . . ?
C3 Fe C14 156.63(9) . . ?
C11 Fe C14 67.40(9) . . ?
C2 Fe C14 163.02(9) . . ?
C12 Fe C14 67.27(8) . . ?
C15 Fe C14 39.58(9) . . ?
C1 Fe C14 127.13(9) . . ?
C3 Fe C13 120.82(8) . . ?
C11 Fe C13 67.27(9) . . ?
C2 Fe C13 148.73(9) . . ?
C12 Fe C13 39.76(8) . . ?
C15 Fe C13 67.21(8) . . ?
C1 Fe C13 164.31(9) . . ?
C14 Fe C13 40.03(8) . . ?
C3 Fe C4 40.03(9) . . ?
C11 Fe C4 154.30(8) . . ?
C2 Fe C4 75.04(9) . . ?
C12 Fe C4 116.88(8) . . ?
C15 Fe C4 158.69(9) . . ?
C1 Fe C4 92.46(9) . . ?
C14 Fe C4 120.83(9) . . ?
C13 Fe C4 102.58(8) . . ?
C3 Fe C5 71.43(8) . . ?
C11 Fe C5 165.14(8) . . ?
C2 Fe C5 90.65(9) . . ?
C12 Fe C5 141.49(9) . . ?
C15 Fe C5 124.51(8) . . ?
C1 Fe C5 82.40(9) . . ?
C14 Fe C5 99.04(8) . . ?
C13 Fe C5 106.71(9) . . ?
C4 Fe C5 38.18(8) . . ?
C2 C1 Fe 68.99(13) . . ?
C3 C2 C1 122.2(2) . . ?
C3 C2 C10 116.7(2) . . ?
C1 C2 C10 120.8(2) . . ?
C3 C2 Fe 69.60(12) . . ?
C1 C2 Fe 70.81(13) . . ?
C10 C2 Fe 128.46(16) . . ?
C2 C3 C4 127.0(2) . . ?
C2 C3 Fe 70.14(12) . . ?
C4 C3 Fe 72.41(12) . . ?
C3 C4 C5 123.2(2) . . ?
C3 C4 C9 119.1(2) . . ?
C5 C4 C9 117.5(2) . . ?
C3 C4 Fe 67.56(12) . . ?
C5 C4 Fe 75.98(12) . . ?
C9 C4 Fe 126.36(15) . . ?
C6 C5 C4 118.0(2) . . ?
C6 C5 Fe 127.59(16) . . ?
C4 C5 Fe 65.84(12) . . ?
C7 C6 C5 122.4(2) . . ?
C6 C7 C8 119.4(2) . . ?
C9 C8 C7 120.4(2) . . ?
C8 C9 C4 122.2(2) . . ?
C12 C11 C15 107.83(19) . . ?
C12 C11 C16 126.5(2) . . ?
C15 C11 C16 125.2(2) . . ?
C12 C11 Fe 70.28(12) . . ?
C15 C11 Fe 70.16(12) . . ?
C16 C11 Fe 131.16(16) . . ?
C13 C12 C11 108.20(18) . . ?
C13 C12 C17 126.2(2) . . ?
C11 C12 C17 125.5(2) . . ?
C13 C12 Fe 71.23(12) . . ?
C11 C12 Fe 69.33(12) . . ?
C17 C12 Fe 128.20(15) . . ?
C12 C13 C14 107.90(19) . . ?
C12 C13 C18 126.7(2) . . ?
C14 C13 C18 125.2(2) . . ?
C12 C13 Fe 69.02(12) . . ?
C14 C13 Fe 69.81(12) . . ?
C18 C13 Fe 131.09(15) . . ?
C15 C14 C13 108.46(18) . . ?
C15 C14 C19 126.5(2) . . ?
C13 C14 C19 124.8(2) . . ?
C15 C14 Fe 69.42(12) . . ?
C13 C14 Fe 70.16(11) . . ?
C19 C14 Fe 130.32(16) . . ?
C14 C15 C11 107.62(18) . . ?
C14 C15 C20 126.4(2) . . ?
C11 C15 C20 125.8(2) . . ?
C14 C15 Fe 71.00(12) . . ?
C11 C15 Fe 68.95(12) . . ?
C20 C15 Fe 128.78(16) . . ?

loop_
 _geom_torsion_atom_site_label_1
 _geom_torsion_atom_site_label_2
 _geom_torsion_atom_site_label_3
 _geom_torsion_atom_site_label_4
 _geom_torsion
 _geom_torsion_site_symmetry_1
 _geom_torsion_site_symmetry_2
 _geom_torsion_site_symmetry_3
 _geom_torsion_site_symmetry_4
 _geom_torsion_publ_flag
C3 Fe C1 C2 -27.31(14) . . . . ?
C11 Fe C1 C2 94.62(14) . . . . ?
C12 Fe C1 C2 70.04(18) . . . . ?
C15 Fe C1 C2 135.88(14) . . . . ?
C14 Fe C1 C2 164.28(13) . . . . ?
C13 Fe C1 C2 133.2(3) . . . . ?
C4 Fe C1 C2 -63.19(14) . . . . ?
C5 Fe C1 C2 -100.11(14) . . . . ?
Fe C1 C2 C3 49.07(19) . . . . ?
Fe C1 C2 C10 -124.0(2) . . . . ?
C11 Fe C2 C3 129.55(13) . . . . ?
C12 Fe C2 C3 88.95(14) . . . . ?
C15 Fe C2 C3 166.91(13) . . . . ?
C1 Fe C2 C3 -137.0(2) . . . . ?
C14 Fe C2 C3 175.3(3) . . . . ?
C13 Fe C2 C3 65.3(2) . . . . ?
C4 Fe C2 C3 -24.35(13) . . . . ?
C5 Fe C2 C3 -59.59(13) . . . . ?
C3 Fe C2 C1 137.0(2) . . . . ?
C11 Fe C2 C1 -93.46(15) . . . . ?
C12 Fe C2 C1 -134.06(14) . . . . ?
C15 Fe C2 C1 -56.10(17) . . . . ?
C14 Fe C2 C1 -47.7(4) . . . . ?
C13 Fe C2 C1 -157.67(16) . . . . ?
C4 Fe C2 C1 112.64(15) . . . . ?
C5 Fe C2 C1 77.40(15) . . . . ?
C3 Fe C2 C10 -108.4(3) . . . . ?
C11 Fe C2 C10 21.1(2) . . . . ?
C12 Fe C2 C10 -19.5(2) . . . . ?
C15 Fe C2 C10 58.5(2) . . . . ?
C1 Fe C2 C10 114.6(3) . . . . ?
C14 Fe C2 C10 66.9(4) . . . . ?
C13 Fe C2 C10 -43.1(3) . . . . ?
C4 Fe C2 C10 -132.8(2) . . . . ?
C5 Fe C2 C10 -168.0(2) . . . . ?
C1 C2 C3 C4 -1.9(4) . . . . ?
C10 C2 C3 C4 171.4(2) . . . . ?
Fe C2 C3 C4 47.6(2) . . . . ?
C1 C2 C3 Fe -49.6(2) . . . . ?
C10 C2 C3 Fe 123.76(19) . . . . ?
C11 Fe C3 C2 -65.03(15) . . . . ?
C12 Fe C3 C2 -105.88(13) . . . . ?
C15 Fe C3 C2 -35.9(3) . . . . ?
C1 Fe C3 C2 27.28(13) . . . . ?
C14 Fe C3 C2 -176.5(2) . . . . ?
C13 Fe C3 C2 -146.68(13) . . . . ?
C4 Fe C3 C2 141.74(19) . . . . ?
C5 Fe C3 C2 114.53(14) . . . . ?
C11 Fe C3 C4 153.23(12) . . . . ?
C2 Fe C3 C4 -141.74(19) . . . . ?
C12 Fe C3 C4 112.38(13) . . . . ?
C15 Fe C3 C4 -177.6(2) . . . . ?
C1 Fe C3 C4 -114.46(14) . . . . ?
C14 Fe C3 C4 41.7(3) . . . . ?
C13 Fe C3 C4 71.58(15) . . . . ?
C5 Fe C3 C4 -27.21(12) . . . . ?
C2 C3 C4 C5 7.5(3) . . . . ?
Fe C3 C4 C5 54.34(19) . . . . ?
C2 C3 C4 C9 -167.1(2) . . . . ?
Fe C3 C4 C9 -120.28(19) . . . . ?
C2 C3 C4 Fe -46.8(2) . . . . ?
C11 Fe C4 C3 -60.1(2) . . . . ?
C2 Fe C4 C3 24.47(13) . . . . ?
C12 Fe C4 C3 -83.75(14) . . . . ?
C15 Fe C4 C3 177.9(2) . . . . ?
C1 Fe C4 C3 61.07(13) . . . . ?
C14 Fe C4 C3 -162.10(12) . . . . ?
C13 Fe C4 C3 -123.40(13) . . . . ?
C5 Fe C4 C3 135.48(19) . . . . ?
C3 Fe C4 C5 -135.48(19) . . . . ?
C11 Fe C4 C5 164.44(19) . . . . ?
C2 Fe C4 C5 -111.01(14) . . . . ?
C12 Fe C4 C5 140.77(13) . . . . ?
C15 Fe C4 C5 42.4(3) . . . . ?
C1 Fe C4 C5 -74.41(14) . . . . ?
C14 Fe C4 C5 62.42(16) . . . . ?
C13 Fe C4 C5 101.12(14) . . . . ?
C3 Fe C4 C9 110.5(2) . . . . ?
C11 Fe C4 C9 50.4(3) . . . . ?
C2 Fe C4 C9 134.9(2) . . . . ?
C12 Fe C4 C9 26.7(2) . . . . ?
C15 Fe C4 C9 -71.6(3) . . . . ?
C1 Fe C4 C9 171.5(2) . . . . ?
C14 Fe C4 C9 -51.6(2) . . . . ?
C13 Fe C4 C9 -12.9(2) . . . . ?
C5 Fe C4 C9 -114.1(3) . . . . ?
C3 C4 C5 C6 -172.0(2) . . . . ?
C9 C4 C5 C6 2.7(3) . . . . ?
Fe C4 C5 C6 -121.24(19) . . . . ?
C3 C4 C5 Fe -50.72(18) . . . . ?
C9 C4 C5 Fe 123.98(19) . . . . ?
C3 Fe C5 C6 136.1(2) . . . . ?
C11 Fe C5 C6 -45.3(4) . . . . ?
C2 Fe C5 C6 172.1(2) . . . . ?
C12 Fe C5 C6 42.8(3) . . . . ?
C15 Fe C5 C6 -55.0(2) . . . . ?
C1 Fe C5 C6 -148.4(2) . . . . ?
C14 Fe C5 C6 -21.9(2) . . . . ?
C13 Fe C5 C6 18.5(2) . . . . ?
C4 Fe C5 C6 107.7(2) . . . . ?
C3 Fe C5 C4 28.41(13) . . . . ?
C11 Fe C5 C4 -153.0(3) . . . . ?
C2 Fe C5 C4 64.42(14) . . . . ?
C12 Fe C5 C4 -64.96(19) . . . . ?
C15 Fe C5 C4 -162.69(13) . . . . ?
C1 Fe C5 C4 103.87(14) . . . . ?
C14 Fe C5 C4 -129.59(14) . . . . ?
C13 Fe C5 C4 -89.21(14) . . . . ?
C4 C5 C6 C7 -2.1(3) . . . . ?
Fe C5 C6 C7 -81.9(3) . . . . ?
C5 C6 C7 C8 -0.3(4) . . . . ?
C6 C7 C8 C9 2.0(4) . . . . ?
C7 C8 C9 C4 -1.2(4) . . . . ?
C3 C4 C9 C8 173.7(2) . . . . ?
C5 C4 C9 C8 -1.2(3) . . . . ?
Fe C4 C9 C8 91.4(3) . . . . ?
C3 Fe C11 C12 -75.46(15) . . . . ?
C2 Fe C11 C12 -112.11(13) . . . . ?
C15 Fe C11 C12 118.37(18) . . . . ?
C1 Fe C11 C12 -153.08(13) . . . . ?
C14 Fe C11 C12 80.98(13) . . . . ?
C13 Fe C11 C12 37.44(12) . . . . ?
C4 Fe C11 C12 -33.6(3) . . . . ?
C5 Fe C11 C12 106.2(3) . . . . ?
C3 Fe C11 C15 166.18(13) . . . . ?
C2 Fe C11 C15 129.52(13) . . . . ?
C12 Fe C11 C15 -118.37(18) . . . . ?
C1 Fe C11 C15 88.55(14) . . . . ?
C14 Fe C11 C15 -37.38(13) . . . . ?
C13 Fe C11 C15 -80.92(13) . . . . ?
C4 Fe C11 C15 -151.92(19) . . . . ?
C5 Fe C11 C15 -12.2(4) . . . . ?
C3 Fe C11 C16 46.2(2) . . . . ?
C2 Fe C11 C16 9.6(2) . . . . ?
C12 Fe C11 C16 121.7(3) . . . . ?
C15 Fe C11 C16 -119.9(3) . . . . ?
C1 Fe C11 C16 -31.4(2) . . . . ?
C14 Fe C11 C16 -157.3(2) . . . . ?
C13 Fe C11 C16 159.1(2) . . . . ?
C4 Fe C11 C16 88.1(3) . . . . ?
C5 Fe C11 C16 -132.1(3) . . . . ?
C15 C11 C12 C13 -0.5(2) . . . . ?
C16 C11 C12 C13 171.9(2) . . . . ?
Fe C11 C12 C13 -60.92(15) . . . . ?
C15 C11 C12 C17 -176.7(2) . . . . ?
C16 C11 C12 C17 -4.3(3) . . . . ?
Fe C11 C12 C17 122.9(2) . . . . ?
C15 C11 C12 Fe 60.39(15) . . . . ?
C16 C11 C12 Fe -127.2(2) . . . . ?
C3 Fe C12 C13 -118.67(13) . . . . ?
C11 Fe C12 C13 118.73(17) . . . . ?
C2 Fe C12 C13 -161.03(12) . . . . ?
C15 Fe C12 C13 80.33(13) . . . . ?
C1 Fe C12 C13 157.84(13) . . . . ?
C14 Fe C12 C13 37.39(12) . . . . ?
C4 Fe C12 C13 -76.86(14) . . . . ?
C5 Fe C12 C13 -37.96(19) . . . . ?
C3 Fe C12 C11 122.59(13) . . . . ?
C2 Fe C12 C11 80.23(14) . . . . ?
C15 Fe C12 C11 -38.40(12) . . . . ?
C1 Fe C12 C11 39.11(18) . . . . ?
C14 Fe C12 C11 -81.35(13) . . . . ?
C13 Fe C12 C11 -118.73(17) . . . . ?
C4 Fe C12 C11 164.41(13) . . . . ?
C5 Fe C12 C11 -156.70(14) . . . . ?
C3 Fe C12 C17 3.1(2) . . . . ?
C11 Fe C12 C17 -119.5(3) . . . . ?
C2 Fe C12 C17 -39.3(2) . . . . ?
C15 Fe C12 C17 -157.9(2) . . . . ?
C1 Fe C12 C17 -80.4(2) . . . . ?
C14 Fe C12 C17 159.1(2) . . . . ?
C13 Fe C12 C17 121.8(3) . . . . ?
C4 Fe C12 C17 44.9(2) . . . . ?
C5 Fe C12 C17 83.8(2) . . . . ?
C11 C12 C13 C14 0.5(2) . . . . ?
C17 C12 C13 C14 176.7(2) . . . . ?
Fe C12 C13 C14 -59.18(15) . . . . ?
C11 C12 C13 C18 -174.0(2) . . . . ?
C17 C12 C13 C18 2.2(3) . . . . ?
Fe C12 C13 C18 126.3(2) . . . . ?
C11 C12 C13 Fe 59.72(14) . . . . ?
C17 C12 C13 Fe -124.1(2) . . . . ?
C3 Fe C13 C12 78.43(14) . . . . ?
C11 Fe C13 C12 -38.03(12) . . . . ?
C2 Fe C13 C12 35.3(2) . . . . ?
C15 Fe C13 C12 -82.55(13) . . . . ?
C1 Fe C13 C12 -79.6(4) . . . . ?
C14 Fe C13 C12 -119.45(18) . . . . ?
C4 Fe C13 C12 117.13(13) . . . . ?
C5 Fe C13 C12 156.43(12) . . . . ?
C3 Fe C13 C14 -162.12(13) . . . . ?
C11 Fe C13 C14 81.43(13) . . . . ?
C2 Fe C13 C14 154.74(17) . . . . ?
C12 Fe C13 C14 119.45(18) . . . . ?
C15 Fe C13 C14 36.91(13) . . . . ?
C1 Fe C13 C14 39.8(4) . . . . ?
C4 Fe C13 C14 -123.42(13) . . . . ?
C5 Fe C13 C14 -84.12(13) . . . . ?
C3 Fe C13 C18 -42.5(2) . . . . ?
C11 Fe C13 C18 -159.0(2) . . . . ?
C2 Fe C13 C18 -85.6(3) . . . . ?
C12 Fe C13 C18 -120.9(3) . . . . ?
C15 Fe C13 C18 156.5(2) . . . . ?
C1 Fe C13 C18 159.4(3) . . . . ?
C14 Fe C13 C18 119.6(3) . . . . ?
C4 Fe C13 C18 -3.8(2) . . . . ?
C5 Fe C13 C18 35.5(2) . . . . ?
C12 C13 C14 C15 -0.4(2) . . . . ?
C18 C13 C14 C15 174.3(2) . . . . ?
Fe C13 C14 C15 -59.04(15) . . . . ?
C12 C13 C14 C19 -175.4(2) . . . . ?
C18 C13 C14 C19 -0.8(3) . . . . ?
Fe C13 C14 C19 125.9(2) . . . . ?
C12 C13 C14 Fe 58.69(14) . . . . ?
C18 C13 C14 Fe -126.7(2) . . . . ?
C3 Fe C14 C15 161.3(2) . . . . ?
C11 Fe C14 C15 38.59(13) . . . . ?
C2 Fe C14 C15 -11.0(4) . . . . ?
C12 Fe C14 C15 82.53(13) . . . . ?
C1 Fe C14 C15 -47.78(17) . . . . ?
C13 Fe C14 C15 119.67(18) . . . . ?
C4 Fe C14 C15 -168.76(12) . . . . ?
C5 Fe C14 C15 -135.06(13) . . . . ?
C3 Fe C14 C13 41.7(3) . . . . ?
C11 Fe C14 C13 -81.08(13) . . . . ?
C2 Fe C14 C13 -130.7(3) . . . . ?
C12 Fe C14 C13 -37.14(13) . . . . ?
C15 Fe C14 C13 -119.67(18) . . . . ?
C1 Fe C14 C13 -167.45(13) . . . . ?
C4 Fe C14 C13 71.57(14) . . . . ?
C5 Fe C14 C13 105.27(13) . . . . ?
C3 Fe C14 C19 -77.6(3) . . . . ?
C11 Fe C14 C19 159.6(2) . . . . ?
C2 Fe C14 C19 110.0(3) . . . . ?
C12 Fe C14 C19 -156.4(2) . . . . ?
C15 Fe C14 C19 121.0(3) . . . . ?
C1 Fe C14 C19 73.3(2) . . . . ?
C13 Fe C14 C19 -119.3(3) . . . . ?
C4 Fe C14 C19 -47.7(2) . . . . ?
C5 Fe C14 C19 -14.0(2) . . . . ?
C13 C14 C15 C11 0.0(2) . . . . ?
C19 C14 C15 C11 174.9(2) . . . . ?
Fe C14 C15 C11 -59.47(15) . . . . ?
C13 C14 C15 C20 -175.8(2) . . . . ?
C19 C14 C15 C20 -0.9(4) . . . . ?
Fe C14 C15 C20 124.7(2) . . . . ?
C13 C14 C15 Fe 59.50(15) . . . . ?
C19 C14 C15 Fe -125.6(2) . . . . ?
C12 C11 C15 C14 0.3(2) . . . . ?
C16 C11 C15 C14 -172.2(2) . . . . ?
Fe C11 C15 C14 60.77(15) . . . . ?
C12 C11 C15 C20 176.2(2) . . . . ?
C16 C11 C15 C20 3.6(4) . . . . ?
Fe C11 C15 C20 -123.4(2) . . . . ?
C12 C11 C15 Fe -60.47(14) . . . . ?
C16 C11 C15 Fe 127.0(2) . . . . ?
C3 Fe C15 C14 -156.8(2) . . . . ?
C11 Fe C15 C14 -118.39(18) . . . . ?
C2 Fe C15 C14 176.16(12) . . . . ?
C12 Fe C15 C14 -80.45(13) . . . . ?
C1 Fe C15 C14 143.49(13) . . . . ?
C13 Fe C15 C14 -37.31(12) . . . . ?
C4 Fe C15 C14 27.4(3) . . . . ?
C5 Fe C15 C14 57.84(15) . . . . ?
C3 Fe C15 C11 -38.4(3) . . . . ?
C2 Fe C15 C11 -65.44(15) . . . . ?
C12 Fe C15 C11 37.94(13) . . . . ?
C1 Fe C15 C11 -98.12(14) . . . . ?
C14 Fe C15 C11 118.39(18) . . . . ?
C13 Fe C15 C11 81.08(13) . . . . ?
C4 Fe C15 C11 145.8(2) . . . . ?
C5 Fe C15 C11 176.23(12) . . . . ?
C3 Fe C15 C20 81.3(4) . . . . ?
C11 Fe C15 C20 119.7(3) . . . . ?
C2 Fe C15 C20 54.2(2) . . . . ?
C12 Fe C15 C20 157.6(2) . . . . ?
C1 Fe C15 C20 21.6(2) . . . . ?
C14 Fe C15 C20 -121.9(3) . . . . ?
C13 Fe C15 C20 -159.2(2) . . . . ?
C4 Fe C15 C20 -94.5(3) . . . . ?
C5 Fe C15 C20 -64.1(2) . . . . ?

_diffrn_measured_fraction_theta_max    0.988
_diffrn_reflns_theta_full              72.50
_diffrn_measured_fraction_theta_full   0.996
_refine_diff_density_max    0.623
_refine_diff_density_min   -0.314
_refine_diff_density_rms    0.058

#=============================================================================
#  end of cif data for "andyg48" (compound 1)
#=============================================================================

#=============================================================================
#  cif data for "andyg41" (compound anti-2)
#=============================================================================


data_andyg41

_audit_creation_method            SHELXL-97
_chemical_name_systematic
;
 ?
;
_chemical_name_common             ?
_chemical_melting_point           ?
_chemical_formula_moiety          ?
_chemical_formula_sum
 'C21 H26 Fe O'
_chemical_formula_weight          350.27

loop_
 _atom_type_symbol
 _atom_type_description
 _atom_type_scat_dispersion_real
 _atom_type_scat_dispersion_imag
 _atom_type_scat_source
 'C'  'C'   0.0181   0.0091
 'International Tables Vol C Tables 4.2.6.8 and 6.1.1.4'
 'H'  'H'   0.0000   0.0000
 'International Tables Vol C Tables 4.2.6.8 and 6.1.1.4'
 'O'  'O'   0.0492   0.0322
 'International Tables Vol C Tables 4.2.6.8 and 6.1.1.4'
 'Fe'  'Fe'  -1.1336   3.1974
 'International Tables Vol C Tables 4.2.6.8 and 6.1.1.4'

_symmetry_cell_setting            monoclinic
_symmetry_space_group_name_H-M    'P 21/n'

loop_
 _symmetry_equiv_pos_as_xyz
 'x, y, z'
 '-x+1/2, y+1/2, -z+1/2'
 '-x, -y, -z'
 'x-1/2, -y-1/2, z-1/2'

_cell_length_a                    10.0070(2)
_cell_length_b                    16.1642(2)
_cell_length_c                    10.9946(2)
_cell_angle_alpha                 90.00
_cell_angle_beta                  96.813(2)
_cell_angle_gamma                 90.00
_cell_volume                      1765.87(5)
_cell_formula_units_Z             4
_cell_measurement_temperature     100(2)
_cell_measurement_reflns_used     20308
_cell_measurement_theta_min       4.0461
_cell_measurement_theta_max       75.7795

_exptl_crystal_description        prism
_exptl_crystal_colour             orange
_exptl_crystal_size_max           0.08
_exptl_crystal_size_mid           0.06
_exptl_crystal_size_min           0.05
_exptl_crystal_density_meas       ?
_exptl_crystal_density_diffrn     1.317
_exptl_crystal_density_method     'not measured'
_exptl_crystal_F_000              744
_exptl_absorpt_coefficient_mu     6.843
_exptl_absorpt_correction_type    multi-scan
_exptl_absorpt_correction_T_min   0.75652
_exptl_absorpt_correction_T_max   1.00000
_exptl_absorpt_process_details
;
CrysAlisPro, Oxford Diffraction Ltd.,
Version 1.171.33.55 (release 05-01-2010 CrysAlis171 .NET)
(compiled Jan  5 2010,16:28:46)
;

_exptl_special_details
;
 ?
;

_diffrn_ambient_temperature       100(2)
_diffrn_radiation_wavelength      1.54184
_diffrn_radiation_type            'Cu K\a'
_diffrn_radiation_source          'Nova (Cu) X-ray Source'
_diffrn_radiation_monochromator   mirror
_diffrn_measurement_device_type   'Oxford Diffraction Xcalibur, Atlas, Nova'
_diffrn_measurement_method        '\w scans'
_diffrn_detector_area_resol_mean  10.3543
_diffrn_standards_number          ?
_diffrn_standards_interval_count  ?
_diffrn_standards_interval_time   ?
_diffrn_standards_decay_%         ?
_diffrn_reflns_number             28820
_diffrn_reflns_av_R_equivalents   0.0349
_diffrn_reflns_av_sigmaI/netI     0.0147
_diffrn_reflns_limit_h_min        -12
_diffrn_reflns_limit_h_max        12
_diffrn_reflns_limit_k_min        -20
_diffrn_reflns_limit_k_max        19
_diffrn_reflns_limit_l_min        -13
_diffrn_reflns_limit_l_max        12
_diffrn_reflns_theta_min          4.89
_diffrn_reflns_theta_max          75.97
_reflns_number_total              3678
_reflns_number_gt                 3450
_reflns_threshold_expression      >2sigma(I)

_computing_data_collection
;
CrysAlisPro, Oxford Diffraction Ltd.,
Version 1.171.33.55 (release 05-01-2010 CrysAlis171 .NET)
(compiled Jan  5 2010,16:28:46)
;
_computing_cell_refinement
;
CrysAlisPro, Oxford Diffraction Ltd.,
Version 1.171.33.55 (release 05-01-2010 CrysAlis171 .NET)
(compiled Jan  5 2010,16:28:46)
;
_computing_data_reduction
;
CrysAlisPro, Oxford Diffraction Ltd.,
Version 1.171.33.55 (release 05-01-2010 CrysAlis171 .NET)
(compiled Jan  5 2010,16:28:46)
;
_computing_structure_solution     'SHELXS-97 (Sheldrick, 1990)'
_computing_structure_refinement   'SHELXL-97 (Sheldrick, 1997)'
_computing_molecular_graphics     'BRUKER XP'
_computing_publication_material   'SHELXL-97'

_refine_special_details
;
 Refinement of F^2^ against ALL reflections.  The weighted R-factor wR and
 goodness of fit S are based on F^2^, conventional R-factors R are based
 on F, with F set to zero for negative F^2^. The threshold expression of
 F^2^ > 2sigma(F^2^) is used only for calculating R-factors(gt) etc. and is
 not relevant to the choice of reflections for refinement.  R-factors based
 on F^2^ are statistically about twice as large as those based on F, and R-
 factors based on ALL data will be even larger.

 The hydrogens of the C1 and C3 atoms were refined freely.
;

_refine_ls_structure_factor_coef  Fsqd
_refine_ls_matrix_type            full
_refine_ls_weighting_scheme       calc
_refine_ls_weighting_details
 'calc w=1/[\s^2^(Fo^2^)+(0.0431P)^2^+0.3626P] where P=(Fo^2^+2Fc^2^)/3'
_atom_sites_solution_primary      direct
_atom_sites_solution_secondary    difmap
_atom_sites_solution_hydrogens    geom
_refine_ls_hydrogen_treatment     mixed
_refine_ls_extinction_method      none
_refine_ls_extinction_coef        ?
_refine_ls_number_reflns          3678
_refine_ls_number_parameters      226
_refine_ls_number_restraints      0
_refine_ls_R_factor_all           0.0268
_refine_ls_R_factor_gt            0.0254
_refine_ls_wR_factor_ref          0.0709
_refine_ls_wR_factor_gt           0.0704
_refine_ls_goodness_of_fit_ref    1.113
_refine_ls_restrained_S_all       1.113
_refine_ls_shift/su_max           0.001
_refine_ls_shift/su_mean          0.000

loop_
 _atom_site_label
 _atom_site_type_symbol
 _atom_site_fract_x
 _atom_site_fract_y
 _atom_site_fract_z
 _atom_site_U_iso_or_equiv
 _atom_site_adp_type
 _atom_site_occupancy
 _atom_site_symmetry_multiplicity
 _atom_site_calc_flag
 _atom_site_refinement_flags
 _atom_site_disorder_assembly
 _atom_site_disorder_group
Fe Fe 0.679301(19) 0.653105(12) 0.241365(17) 0.01479(8) Uani 1 1 d . . .
O O 0.47945(10) 0.60785(7) 0.03944(9) 0.0261(2) Uani 1 1 d . . .
C1 C 0.56208(14) 0.75898(9) 0.26229(13) 0.0213(3) Uani 1 1 d . . .
H1A H 0.4793(18) 0.7553(11) 0.2085(16) 0.026(4) Uiso 1 1 d . . .
H1B H 0.6058(19) 0.8125(12) 0.2628(17) 0.031(5) Uiso 1 1 d . . .
C2 C 0.58744(13) 0.71274(8) 0.37242(12) 0.0195(3) Uani 1 1 d . . .
C3 C 0.55300(13) 0.62693(9) 0.37620(12) 0.0194(3) Uani 1 1 d . . .
H3 H 0.6003(17) 0.5969(10) 0.4466(16) 0.023(4) Uiso 1 1 d . . .
C4 C 0.42390(13) 0.58635(8) 0.33092(12) 0.0187(3) Uani 1 1 d . . .
C5 C 0.30619(14) 0.62930(9) 0.28696(13) 0.0218(3) Uani 1 1 d . . .
H5 H 0.3070 0.6881 0.2855 0.026 Uiso 1 1 calc R . .
C6 C 0.18846(14) 0.58732(10) 0.24557(13) 0.0247(3) Uani 1 1 d . . .
H6 H 0.1103 0.6177 0.2152 0.030 Uiso 1 1 calc R . .
C7 C 0.18369(13) 0.50143(10) 0.24798(12) 0.0245(3) Uani 1 1 d . . .
H7 H 0.1030 0.4729 0.2194 0.029 Uiso 1 1 calc R . .
C8 C 0.29861(14) 0.45792(9) 0.29272(13) 0.0243(3) Uani 1 1 d . . .
H8 H 0.2966 0.3992 0.2953 0.029 Uiso 1 1 calc R . .
C9 C 0.41665(14) 0.49976(9) 0.33373(12) 0.0218(3) Uani 1 1 d . . .
H9 H 0.4943 0.4690 0.3644 0.026 Uiso 1 1 calc R . .
C10 C 0.66503(15) 0.75292(9) 0.48291(13) 0.0246(3) Uani 1 1 d . . .
H10A H 0.7287 0.7931 0.4560 0.037 Uiso 1 1 calc R . .
H10B H 0.7145 0.7105 0.5336 0.037 Uiso 1 1 calc R . .
H10C H 0.6023 0.7812 0.5309 0.037 Uiso 1 1 calc R . .
C11 C 0.88172(13) 0.65382(8) 0.32971(13) 0.0188(3) Uani 1 1 d . . .
C12 C 0.84062(13) 0.57181(8) 0.29393(13) 0.0181(3) Uani 1 1 d . . .
C13 C 0.80753(12) 0.57141(8) 0.16454(12) 0.0178(3) Uani 1 1 d . . .
C14 C 0.82395(13) 0.65457(8) 0.12031(13) 0.0185(3) Uani 1 1 d . . .
C15 C 0.86997(13) 0.70511(8) 0.22317(13) 0.0191(3) Uani 1 1 d . . .
C16 C 0.95162(15) 0.67656(9) 0.45345(13) 0.0251(3) Uani 1 1 d . . .
H16A H 0.9092 0.6474 0.5169 0.038 Uiso 1 1 calc R . .
H16B H 0.9447 0.7364 0.4657 0.038 Uiso 1 1 calc R . .
H16C H 1.0467 0.6608 0.4586 0.038 Uiso 1 1 calc R . .
C17 C 0.84312(15) 0.49790(9) 0.37639(13) 0.0234(3) Uani 1 1 d . . .
H17A H 0.7762 0.4575 0.3416 0.035 Uiso 1 1 calc R . .
H17B H 0.8220 0.5151 0.4574 0.035 Uiso 1 1 calc R . .
H17C H 0.9328 0.4727 0.3841 0.035 Uiso 1 1 calc R . .
C18 C 0.77298(15) 0.49651(9) 0.08676(13) 0.0243(3) Uani 1 1 d . . .
H18A H 0.8560 0.4693 0.0689 0.037 Uiso 1 1 calc R . .
H18B H 0.7203 0.5132 0.0099 0.037 Uiso 1 1 calc R . .
H18C H 0.7201 0.4580 0.1307 0.037 Uiso 1 1 calc R . .
C19 C 0.80399(15) 0.68061(10) -0.01168(13) 0.0259(3) Uani 1 1 d . . .
H19A H 0.7877 0.7404 -0.0167 0.039 Uiso 1 1 calc R . .
H19B H 0.7265 0.6513 -0.0543 0.039 Uiso 1 1 calc R . .
H19C H 0.8848 0.6672 -0.0502 0.039 Uiso 1 1 calc R . .
C20 C 0.90861(15) 0.79450(9) 0.21994(15) 0.0268(3) Uani 1 1 d . . .
H20A H 1.0059 0.7990 0.2173 0.040 Uiso 1 1 calc R . .
H20B H 0.8844 0.8223 0.2935 0.040 Uiso 1 1 calc R . .
H20C H 0.8608 0.8206 0.1469 0.040 Uiso 1 1 calc R . .
C21 C 0.55470(13) 0.62540(8) 0.12355(12) 0.0198(3) Uani 1 1 d . . .

loop_
 _atom_site_aniso_label
 _atom_site_aniso_U_11
 _atom_site_aniso_U_22
 _atom_site_aniso_U_33
 _atom_site_aniso_U_23
 _atom_site_aniso_U_13
 _atom_site_aniso_U_12
Fe 0.01420(11) 0.01523(11) 0.01474(11) 0.00049(7) 0.00089(7) -0.00014(7)
O 0.0232(5) 0.0315(5) 0.0220(5) -0.0014(4) -0.0036(4) -0.0031(4)
C1 0.0221(7) 0.0181(6) 0.0242(7) 0.0010(5) 0.0044(5) 0.0042(5)
C2 0.0186(6) 0.0214(6) 0.0189(6) -0.0020(5) 0.0041(5) 0.0017(5)
C3 0.0189(6) 0.0229(6) 0.0166(6) 0.0029(5) 0.0030(5) 0.0024(5)
C4 0.0185(6) 0.0230(7) 0.0154(6) 0.0018(5) 0.0051(5) 0.0003(5)
C5 0.0206(6) 0.0228(7) 0.0227(7) -0.0001(5) 0.0052(5) 0.0030(5)
C6 0.0181(6) 0.0325(8) 0.0237(7) -0.0002(5) 0.0041(5) 0.0036(5)
C7 0.0194(7) 0.0324(8) 0.0220(7) -0.0021(5) 0.0040(6) -0.0054(5)
C8 0.0278(7) 0.0223(7) 0.0234(7) 0.0005(5) 0.0056(6) -0.0032(5)
C9 0.0204(6) 0.0234(7) 0.0220(7) 0.0045(5) 0.0041(5) 0.0009(5)
C10 0.0255(7) 0.0261(7) 0.0225(7) -0.0053(5) 0.0040(6) -0.0003(5)
C11 0.0140(6) 0.0200(7) 0.0217(7) -0.0026(5) -0.0005(5) 0.0006(5)
C12 0.0150(6) 0.0179(6) 0.0212(6) 0.0002(5) 0.0010(5) 0.0017(5)
C13 0.0149(6) 0.0179(6) 0.0208(6) -0.0020(5) 0.0028(5) 0.0012(5)
C14 0.0159(6) 0.0199(7) 0.0202(7) -0.0004(5) 0.0036(5) -0.0009(5)
C15 0.0152(6) 0.0178(6) 0.0248(7) -0.0014(5) 0.0041(5) -0.0019(5)
C16 0.0242(7) 0.0252(7) 0.0240(7) -0.0061(6) -0.0047(6) 0.0013(6)
C17 0.0255(7) 0.0199(7) 0.0242(7) 0.0032(5) -0.0002(5) 0.0024(5)
C18 0.0251(7) 0.0231(7) 0.0246(7) -0.0062(6) 0.0018(5) -0.0022(5)
C19 0.0281(7) 0.0293(8) 0.0211(7) 0.0032(6) 0.0061(6) -0.0030(6)
C20 0.0272(7) 0.0189(7) 0.0353(8) -0.0014(6) 0.0073(6) -0.0053(5)
C21 0.0192(6) 0.0192(6) 0.0218(7) 0.0030(5) 0.0060(5) 0.0010(5)

_geom_special_details
;
 All esds (except the esd in the dihedral angle between two l.s. planes)
 are estimated using the full covariance matrix.  The cell esds are taken
 into account individually in the estimation of esds in distances, angles
 and torsion angles; correlations between esds in cell parameters are only
 used when they are defined by crystal symmetry.  An approximate (isotropic)
 treatment of cell esds is used for estimating esds involving l.s. planes.
;

loop_
 _geom_bond_atom_site_label_1
 _geom_bond_atom_site_label_2
 _geom_bond_distance
 _geom_bond_site_symmetry_2
 _geom_bond_publ_flag
Fe C21 1.7464(14) . ?
Fe C2 2.0408(13) . ?
Fe C14 2.0795(13) . ?
Fe C13 2.0883(13) . ?
Fe C3 2.1021(13) . ?
Fe C1 2.1028(13) . ?
Fe C12 2.1084(13) . ?
Fe C15 2.1161(13) . ?
Fe C11 2.1401(13) . ?
O C21 1.1566(17) . ?
C1 C2 1.4199(19) . ?
C2 C3 1.4311(19) . ?
C2 C10 1.5088(19) . ?
C3 C4 1.4814(19) . ?
C4 C9 1.4020(19) . ?
C4 C5 1.4029(19) . ?
C5 C6 1.389(2) . ?
C6 C7 1.389(2) . ?
C7 C8 1.388(2) . ?
C8 C9 1.389(2) . ?
C11 C15 1.4285(19) . ?
C11 C12 1.4293(18) . ?
C11 C16 1.4998(18) . ?
C12 C13 1.4218(18) . ?
C12 C17 1.4981(18) . ?
C13 C14 1.4454(18) . ?
C13 C18 1.4989(18) . ?
C14 C15 1.4265(19) . ?
C14 C19 1.5014(19) . ?
C15 C20 1.4972(18) . ?

loop_
 _geom_angle_atom_site_label_1
 _geom_angle_atom_site_label_2
 _geom_angle_atom_site_label_3
 _geom_angle
 _geom_angle_site_symmetry_1
 _geom_angle_site_symmetry_3
 _geom_angle_publ_flag
C21 Fe C2 107.64(6) . . ?
C21 Fe C14 91.04(6) . . ?
C2 Fe C14 148.49(5) . . ?
C21 Fe C13 87.52(6) . . ?
C2 Fe C13 159.09(5) . . ?
C14 Fe C13 40.58(5) . . ?
C21 Fe C3 92.03(6) . . ?
C2 Fe C3 40.38(5) . . ?
C14 Fe C3 167.44(5) . . ?
C13 Fe C3 127.42(5) . . ?
C21 Fe C1 86.07(6) . . ?
C2 Fe C1 40.05(5) . . ?
C14 Fe C1 120.03(5) . . ?
C13 Fe C1 159.46(5) . . ?
C3 Fe C1 72.35(5) . . ?
C21 Fe C12 119.97(6) . . ?
C2 Fe C12 119.68(5) . . ?
C14 Fe C12 67.30(5) . . ?
C13 Fe C12 39.60(5) . . ?
C3 Fe C12 100.73(5) . . ?
C1 Fe C12 153.66(6) . . ?
C21 Fe C15 127.17(6) . . ?
C2 Fe C15 111.46(5) . . ?
C14 Fe C15 39.74(5) . . ?
C13 Fe C15 66.97(5) . . ?
C3 Fe C15 140.44(5) . . ?
C1 Fe C15 102.01(5) . . ?
C12 Fe C15 66.66(5) . . ?
C21 Fe C11 153.14(6) . . ?
C2 Fe C11 99.11(5) . . ?
C14 Fe C11 66.25(5) . . ?
C13 Fe C11 65.99(5) . . ?
C3 Fe C11 107.27(5) . . ?
C1 Fe C11 117.14(5) . . ?
C12 Fe C11 39.31(5) . . ?
C15 Fe C11 39.22(5) . . ?
C2 C1 Fe 67.62(7) . . ?
C1 C2 C3 121.04(12) . . ?
C1 C2 C10 118.87(12) . . ?
C3 C2 C10 119.77(12) . . ?
C1 C2 Fe 72.33(8) . . ?
C3 C2 Fe 72.11(7) . . ?
C10 C2 Fe 122.68(9) . . ?
C2 C3 C4 128.52(12) . . ?
C2 C3 Fe 67.51(7) . . ?
C4 C3 Fe 115.18(9) . . ?
C9 C4 C5 117.26(13) . . ?
C9 C4 C3 118.68(12) . . ?
C5 C4 C3 124.04(13) . . ?
C6 C5 C4 121.07(14) . . ?
C5 C6 C7 120.79(13) . . ?
C8 C7 C6 118.97(13) . . ?
C7 C8 C9 120.35(14) . . ?
C8 C9 C4 121.55(13) . . ?
C15 C11 C12 108.64(12) . . ?
C15 C11 C16 125.86(12) . . ?
C12 C11 C16 124.40(12) . . ?
C15 C11 Fe 69.49(7) . . ?
C12 C11 Fe 69.15(7) . . ?
C16 C11 Fe 136.68(10) . . ?
C13 C12 C11 107.75(12) . . ?
C13 C12 C17 125.95(12) . . ?
C11 C12 C17 126.12(12) . . ?
C13 C12 Fe 69.43(7) . . ?
C11 C12 Fe 71.54(7) . . ?
C17 C12 Fe 128.33(9) . . ?
C12 C13 C14 108.07(11) . . ?
C12 C13 C18 125.81(12) . . ?
C14 C13 C18 125.94(12) . . ?
C12 C13 Fe 70.96(7) . . ?
C14 C13 Fe 69.38(7) . . ?
C18 C13 Fe 129.07(9) . . ?
C15 C14 C13 107.74(12) . . ?
C15 C14 C19 126.80(12) . . ?
C13 C14 C19 125.35(12) . . ?
C15 C14 Fe 71.51(8) . . ?
C13 C14 Fe 70.03(7) . . ?
C19 C14 Fe 126.79(10) . . ?
C14 C15 C11 107.77(11) . . ?
C14 C15 C20 126.43(12) . . ?
C11 C15 C20 125.67(12) . . ?
C14 C15 Fe 68.75(7) . . ?
C11 C15 Fe 71.30(7) . . ?
C20 C15 Fe 128.60(10) . . ?
O C21 Fe 174.78(12) . . ?

loop_
 _geom_torsion_atom_site_label_1
 _geom_torsion_atom_site_label_2
 _geom_torsion_atom_site_label_3
 _geom_torsion_atom_site_label_4
 _geom_torsion
 _geom_torsion_site_symmetry_1
 _geom_torsion_site_symmetry_2
 _geom_torsion_site_symmetry_3
 _geom_torsion_site_symmetry_4
 _geom_torsion_publ_flag
C21 Fe C1 C2 123.64(9) . . . . ?
C14 Fe C1 C2 -147.44(8) . . . . ?
C13 Fe C1 C2 -164.24(13) . . . . ?
C3 Fe C1 C2 30.25(8) . . . . ?
C12 Fe C1 C2 -48.06(15) . . . . ?
C15 Fe C1 C2 -109.17(8) . . . . ?
C11 Fe C1 C2 -70.53(9) . . . . ?
Fe C1 C2 C3 -55.39(11) . . . . ?
Fe C1 C2 C10 118.12(12) . . . . ?
C21 Fe C2 C1 -60.64(9) . . . . ?
C14 Fe C2 C1 63.08(13) . . . . ?
C13 Fe C2 C1 164.51(13) . . . . ?
C3 Fe C2 C1 -132.18(12) . . . . ?
C12 Fe C2 C1 157.67(8) . . . . ?
C15 Fe C2 C1 83.09(9) . . . . ?
C11 Fe C2 C1 121.82(8) . . . . ?
C21 Fe C2 C3 71.54(9) . . . . ?
C14 Fe C2 C3 -164.73(9) . . . . ?
C13 Fe C2 C3 -63.30(17) . . . . ?
C1 Fe C2 C3 132.18(12) . . . . ?
C12 Fe C2 C3 -70.15(9) . . . . ?
C15 Fe C2 C3 -144.73(8) . . . . ?
C11 Fe C2 C3 -106.00(8) . . . . ?
C21 Fe C2 C10 -174.08(11) . . . . ?
C14 Fe C2 C10 -50.35(17) . . . . ?
C13 Fe C2 C10 51.1(2) . . . . ?
C3 Fe C2 C10 114.38(14) . . . . ?
C1 Fe C2 C10 -113.44(15) . . . . ?
C12 Fe C2 C10 44.23(13) . . . . ?
C15 Fe C2 C10 -30.35(13) . . . . ?
C11 Fe C2 C10 8.39(12) . . . . ?
C1 C2 C3 C4 -49.5(2) . . . . ?
C10 C2 C3 C4 137.03(14) . . . . ?
Fe C2 C3 C4 -105.01(13) . . . . ?
C1 C2 C3 Fe 55.49(11) . . . . ?
C10 C2 C3 Fe -117.97(12) . . . . ?
C21 Fe C3 C2 -115.24(8) . . . . ?
C14 Fe C3 C2 140.7(2) . . . . ?
C13 Fe C3 C2 156.33(8) . . . . ?
C1 Fe C3 C2 -30.02(8) . . . . ?
C12 Fe C3 C2 123.73(8) . . . . ?
C15 Fe C3 C2 57.55(11) . . . . ?
C11 Fe C3 C2 83.71(8) . . . . ?
C21 Fe C3 C4 8.14(11) . . . . ?
C2 Fe C3 C4 123.38(13) . . . . ?
C14 Fe C3 C4 -95.9(2) . . . . ?
C13 Fe C3 C4 -80.29(11) . . . . ?
C1 Fe C3 C4 93.36(11) . . . . ?
C12 Fe C3 C4 -112.89(10) . . . . ?
C15 Fe C3 C4 -179.07(9) . . . . ?
C11 Fe C3 C4 -152.91(10) . . . . ?
C2 C3 C4 C9 174.00(13) . . . . ?
Fe C3 C4 C9 93.56(13) . . . . ?
C2 C3 C4 C5 -7.3(2) . . . . ?
Fe C3 C4 C5 -87.69(15) . . . . ?
C9 C4 C5 C6 -1.4(2) . . . . ?
C3 C4 C5 C6 179.86(12) . . . . ?
C4 C5 C6 C7 0.8(2) . . . . ?
C5 C6 C7 C8 0.1(2) . . . . ?
C6 C7 C8 C9 -0.4(2) . . . . ?
C7 C8 C9 C4 -0.3(2) . . . . ?
C5 C4 C9 C8 1.1(2) . . . . ?
C3 C4 C9 C8 179.95(12) . . . . ?
C21 Fe C11 C15 72.28(15) . . . . ?
C2 Fe C11 C15 -112.92(8) . . . . ?
C14 Fe C11 C15 37.87(8) . . . . ?
C13 Fe C11 C15 82.44(8) . . . . ?
C3 Fe C11 C15 -153.63(8) . . . . ?
C1 Fe C11 C15 -75.02(9) . . . . ?
C12 Fe C11 C15 120.51(11) . . . . ?
C21 Fe C11 C12 -48.23(16) . . . . ?
C2 Fe C11 C12 126.57(8) . . . . ?
C14 Fe C11 C12 -82.64(8) . . . . ?
C13 Fe C11 C12 -38.06(8) . . . . ?
C3 Fe C11 C12 85.86(9) . . . . ?
C1 Fe C11 C12 164.48(8) . . . . ?
C15 Fe C11 C12 -120.51(11) . . . . ?
C21 Fe C11 C16 -166.73(14) . . . . ?
C2 Fe C11 C16 8.07(15) . . . . ?
C14 Fe C11 C16 158.85(16) . . . . ?
C13 Fe C11 C16 -156.57(16) . . . . ?
C3 Fe C11 C16 -32.64(15) . . . . ?
C1 Fe C11 C16 45.97(16) . . . . ?
C12 Fe C11 C16 -118.51(17) . . . . ?
C15 Fe C11 C16 120.99(17) . . . . ?
C15 C11 C12 C13 1.90(15) . . . . ?
C16 C11 C12 C13 -166.66(12) . . . . ?
Fe C11 C12 C13 60.29(9) . . . . ?
C15 C11 C12 C17 177.16(12) . . . . ?
C16 C11 C12 C17 8.6(2) . . . . ?
Fe C11 C12 C17 -124.46(13) . . . . ?
C15 C11 C12 Fe -58.38(9) . . . . ?
C16 C11 C12 Fe 133.05(13) . . . . ?
C21 Fe C12 C13 39.17(10) . . . . ?
C2 Fe C12 C13 176.17(7) . . . . ?
C14 Fe C12 C13 -38.20(7) . . . . ?
C3 Fe C12 C13 137.84(8) . . . . ?
C1 Fe C12 C13 -150.40(11) . . . . ?
C15 Fe C12 C13 -81.55(8) . . . . ?
C11 Fe C12 C13 -117.93(11) . . . . ?
C21 Fe C12 C11 157.11(8) . . . . ?
C2 Fe C12 C11 -65.89(9) . . . . ?
C14 Fe C12 C11 79.73(8) . . . . ?
C13 Fe C12 C11 117.93(11) . . . . ?
C3 Fe C12 C11 -104.22(8) . . . . ?
C1 Fe C12 C11 -32.46(16) . . . . ?
C15 Fe C12 C11 36.39(8) . . . . ?
C21 Fe C12 C17 -81.00(13) . . . . ?
C2 Fe C12 C17 56.00(14) . . . . ?
C14 Fe C12 C17 -158.38(14) . . . . ?
C13 Fe C12 C17 -120.18(15) . . . . ?
C3 Fe C12 C17 17.67(13) . . . . ?
C1 Fe C12 C17 89.43(17) . . . . ?
C15 Fe C12 C17 158.28(14) . . . . ?
C11 Fe C12 C17 121.89(16) . . . . ?
C11 C12 C13 C14 -1.92(15) . . . . ?
C17 C12 C13 C14 -177.19(12) . . . . ?
Fe C12 C13 C14 59.71(9) . . . . ?
C11 C12 C13 C18 173.39(12) . . . . ?
C17 C12 C13 C18 -1.9(2) . . . . ?
Fe C12 C13 C18 -124.98(13) . . . . ?
C11 C12 C13 Fe -61.63(9) . . . . ?
C17 C12 C13 Fe 123.10(13) . . . . ?
C21 Fe C13 C12 -146.79(8) . . . . ?
C2 Fe C13 C12 -9.35(18) . . . . ?
C14 Fe C13 C12 118.71(11) . . . . ?
C3 Fe C13 C12 -56.13(10) . . . . ?
C1 Fe C13 C12 141.34(15) . . . . ?
C15 Fe C13 C12 80.71(8) . . . . ?
C11 Fe C13 C12 37.79(8) . . . . ?
C21 Fe C13 C14 94.50(8) . . . . ?
C2 Fe C13 C14 -128.06(15) . . . . ?
C3 Fe C13 C14 -174.85(7) . . . . ?
C1 Fe C13 C14 22.63(19) . . . . ?
C12 Fe C13 C14 -118.71(11) . . . . ?
C15 Fe C13 C14 -38.00(8) . . . . ?
C11 Fe C13 C14 -80.92(8) . . . . ?
C21 Fe C13 C18 -25.65(13) . . . . ?
C2 Fe C13 C18 111.79(17) . . . . ?
C14 Fe C13 C18 -120.15(16) . . . . ?
C3 Fe C13 C18 65.00(14) . . . . ?
C1 Fe C13 C18 -97.53(19) . . . . ?
C12 Fe C13 C18 121.14(16) . . . . ?
C15 Fe C13 C18 -158.15(14) . . . . ?
C11 Fe C13 C18 158.92(14) . . . . ?
C12 C13 C14 C15 1.23(15) . . . . ?
C18 C13 C14 C15 -174.08(12) . . . . ?
Fe C13 C14 C15 61.93(9) . . . . ?
C12 C13 C14 C19 177.73(13) . . . . ?
C18 C13 C14 C19 2.4(2) . . . . ?
Fe C13 C14 C19 -121.57(14) . . . . ?
C12 C13 C14 Fe -60.70(9) . . . . ?
C18 C13 C14 Fe 123.99(13) . . . . ?
C21 Fe C14 C15 157.43(8) . . . . ?
C2 Fe C14 C15 29.86(14) . . . . ?
C13 Fe C14 C15 -117.60(11) . . . . ?
C3 Fe C14 C15 -98.4(2) . . . . ?
C1 Fe C14 C15 71.37(9) . . . . ?
C12 Fe C14 C15 -80.30(8) . . . . ?
C11 Fe C14 C15 -37.37(8) . . . . ?
C21 Fe C14 C13 -84.97(8) . . . . ?
C2 Fe C14 C13 147.47(10) . . . . ?
C3 Fe C14 C13 19.2(3) . . . . ?
C1 Fe C14 C13 -171.03(8) . . . . ?
C12 Fe C14 C13 37.30(7) . . . . ?
C15 Fe C14 C13 117.60(11) . . . . ?
C11 Fe C14 C13 80.23(8) . . . . ?
C21 Fe C14 C19 34.83(12) . . . . ?
C2 Fe C14 C19 -92.73(15) . . . . ?
C13 Fe C14 C19 119.80(15) . . . . ?
C3 Fe C14 C19 139.0(2) . . . . ?
C1 Fe C14 C19 -51.23(14) . . . . ?
C12 Fe C14 C19 157.10(13) . . . . ?
C15 Fe C14 C19 -122.60(15) . . . . ?
C11 Fe C14 C19 -159.97(13) . . . . ?
C13 C14 C15 C11 -0.06(15) . . . . ?
C19 C14 C15 C11 -176.49(13) . . . . ?
Fe C14 C15 C11 60.93(9) . . . . ?
C13 C14 C15 C20 175.99(13) . . . . ?
C19 C14 C15 C20 -0.4(2) . . . . ?
Fe C14 C15 C20 -123.02(14) . . . . ?
C13 C14 C15 Fe -60.99(9) . . . . ?
C19 C14 C15 Fe 122.58(14) . . . . ?
C12 C11 C15 C14 -1.14(15) . . . . ?
C16 C11 C15 C14 167.22(13) . . . . ?
Fe C11 C15 C14 -59.32(9) . . . . ?
C12 C11 C15 C20 -177.22(12) . . . . ?
C16 C11 C15 C20 -8.9(2) . . . . ?
Fe C11 C15 C20 124.60(13) . . . . ?
C12 C11 C15 Fe 58.18(9) . . . . ?
C16 C11 C15 Fe -133.47(14) . . . . ?
C21 Fe C15 C14 -28.79(11) . . . . ?
C2 Fe C15 C14 -163.76(8) . . . . ?
C13 Fe C15 C14 38.79(8) . . . . ?
C3 Fe C15 C14 160.26(9) . . . . ?
C1 Fe C15 C14 -123.00(8) . . . . ?
C12 Fe C15 C14 82.04(8) . . . . ?
C11 Fe C15 C14 118.51(11) . . . . ?
C21 Fe C15 C11 -147.30(8) . . . . ?
C2 Fe C15 C11 77.73(8) . . . . ?
C14 Fe C15 C11 -118.51(11) . . . . ?
C13 Fe C15 C11 -79.72(8) . . . . ?
C3 Fe C15 C11 41.75(12) . . . . ?
C1 Fe C15 C11 118.49(8) . . . . ?
C12 Fe C15 C11 -36.47(8) . . . . ?
C21 Fe C15 C20 91.53(14) . . . . ?
C2 Fe C15 C20 -43.44(14) . . . . ?
C14 Fe C15 C20 120.32(16) . . . . ?
C13 Fe C15 C20 159.11(14) . . . . ?
C3 Fe C15 C20 -79.41(15) . . . . ?
C1 Fe C15 C20 -2.67(14) . . . . ?
C12 Fe C15 C20 -157.64(14) . . . . ?
C11 Fe C15 C20 -121.17(16) . . . . ?
C2 Fe C21 O 148.0(13) . . . . ?
C14 Fe C21 O -6.2(14) . . . . ?
C13 Fe C21 O -46.6(14) . . . . ?
C3 Fe C21 O -174.0(14) . . . . ?
C1 Fe C21 O 113.8(14) . . . . ?
C12 Fe C21 O -70.4(14) . . . . ?
C15 Fe C21 O 11.7(14) . . . . ?
C11 Fe C21 O -37.4(14) . . . . ?

_diffrn_measured_fraction_theta_max    0.997
_diffrn_reflns_theta_full              72.50
_diffrn_measured_fraction_theta_full   1.000
_refine_diff_density_max    0.235
_refine_diff_density_min   -0.404
_refine_diff_density_rms    0.044


#=============================================================================
#  end of cif data for "andyg41" (compound anti-2)
#=============================================================================

#=============================================================================
#  cif data for "andyg69" (compound syn-2)
#=============================================================================


data_andyg69

_audit_creation_method            SHELXL-97
_chemical_name_systematic
;
 ?
;
_chemical_name_common             ?
_chemical_melting_point           ?
_chemical_formula_moiety          ?
_chemical_formula_sum
 'C21 H26 Fe O'
_chemical_formula_weight          350.27

loop_
 _atom_type_symbol
 _atom_type_description
 _atom_type_scat_dispersion_real
 _atom_type_scat_dispersion_imag
 _atom_type_scat_source
 'C'  'C'   0.0181   0.0091
 'International Tables Vol C Tables 4.2.6.8 and 6.1.1.4'
 'H'  'H'   0.0000   0.0000
 'International Tables Vol C Tables 4.2.6.8 and 6.1.1.4'
 'O'  'O'   0.0492   0.0322
 'International Tables Vol C Tables 4.2.6.8 and 6.1.1.4'
 'Fe'  'Fe'  -1.1336   3.1974
 'International Tables Vol C Tables 4.2.6.8 and 6.1.1.4'

_symmetry_cell_setting            monoclinic
_symmetry_space_group_name_H-M    'P 21/c'

loop_
 _symmetry_equiv_pos_as_xyz
 'x, y, z'
 '-x, y+1/2, -z+1/2'
 '-x, -y, -z'
 'x, -y-1/2, z-1/2'

_cell_length_a                    12.3722(2)
_cell_length_b                    9.2362(2)
_cell_length_c                    15.8669(2)
_cell_angle_alpha                 90.00
_cell_angle_beta                  97.385(2)
_cell_angle_gamma                 90.00
_cell_volume                      1798.10(5)
_cell_formula_units_Z             4
_cell_measurement_temperature     100(2)
_cell_measurement_reflns_used     17647
_cell_measurement_theta_min       3.5994
_cell_measurement_theta_max       75.7931

_exptl_crystal_description        prism
_exptl_crystal_colour             orange
_exptl_crystal_size_max           0.12
_exptl_crystal_size_mid           0.10
_exptl_crystal_size_min           0.06
_exptl_crystal_density_meas       ?
_exptl_crystal_density_diffrn     1.294
_exptl_crystal_density_method     'not measured'
_exptl_crystal_F_000              744
_exptl_absorpt_coefficient_mu     6.720
_exptl_absorpt_correction_type    multi-scan
_exptl_absorpt_correction_T_min   0.60372
_exptl_absorpt_correction_T_max   1.00000
_exptl_absorpt_process_details
;
CrysAlisPro, Agilent Technologies,
Version 1.171.34.49 (release 20-01-2011 CrysAlis171 .NET)
(compiled Jan 20 2011,15:58:25)
;

_exptl_special_details
;
 ?
;

_diffrn_ambient_temperature       100(2)
_diffrn_radiation_wavelength      1.54184
_diffrn_radiation_type            'Cu K\a'
_diffrn_radiation_source          'Nova (Cu) X-ray Source'
_diffrn_radiation_monochromator   mirror
_diffrn_measurement_device_type   'Oxford Diffraction Xcalibur, Atlas, Nova'
_diffrn_measurement_method        '\w scans'
_diffrn_detector_area_resol_mean  10.3543
_diffrn_standards_number          ?
_diffrn_standards_interval_count  ?
_diffrn_standards_interval_time   ?
_diffrn_standards_decay_%         ?
_diffrn_reflns_number             28475
_diffrn_reflns_av_R_equivalents   0.0349
_diffrn_reflns_av_sigmaI/netI     0.0155
_diffrn_reflns_limit_h_min        -15
_diffrn_reflns_limit_h_max        15
_diffrn_reflns_limit_k_min        -11
_diffrn_reflns_limit_k_max        11
_diffrn_reflns_limit_l_min        -18
_diffrn_reflns_limit_l_max        19
_diffrn_reflns_theta_min          3.60
_diffrn_reflns_theta_max          70.07
_reflns_number_total              3415
_reflns_number_gt                 3267
_reflns_threshold_expression      >2sigma(I)

_computing_data_collection
;
CrysAlisPro, Agilent Technologies,
Version 1.171.34.49 (release 20-01-2011 CrysAlis171 .NET)
(compiled Jan 20 2011,15:58:25)
;
_computing_cell_refinement
;
CrysAlisPro, Agilent Technologies,
Version 1.171.34.49 (release 20-01-2011 CrysAlis171 .NET)
(compiled Jan 20 2011,15:58:25)
;
_computing_data_reduction
;
CrysAlisPro, Agilent Technologies,
Version 1.171.34.49 (release 20-01-2011 CrysAlis171 .NET)
(compiled Jan 20 2011,15:58:25)
;
_computing_structure_solution     'SHELXS-97 (Sheldrick, 1990)'
_computing_structure_refinement   'SHELXL-97 (Sheldrick, 1997)'
_computing_molecular_graphics     'BRUKER XP'
_computing_publication_material   'SHELXL-97'

_refine_special_details
;
 Refinement of F^2^ against ALL reflections.  The weighted R-factor wR and
 goodness of fit S are based on F^2^, conventional R-factors R are based
 on F, with F set to zero for negative F^2^. The threshold expression of
 F^2^ > 2sigma(F^2^) is used only for calculating R-factors(gt) etc. and is
 not relevant to the choice of reflections for refinement.  R-factors based
 on F^2^ are statistically about twice as large as those based on F, and R-
 factors based on ALL data will be even larger.

 The hydrogens of the C1 and C3 atoms were refined freely, but with C-H
 distance for C1 atom restraints (SADI).
;

_refine_ls_structure_factor_coef  Fsqd
_refine_ls_matrix_type            full
_refine_ls_weighting_scheme       calc
_refine_ls_weighting_details
 'calc w=1/[\s^2^(Fo^2^)+(0.0435P)^2^+1.6194P] where P=(Fo^2^+2Fc^2^)/3'
_atom_sites_solution_primary      direct
_atom_sites_solution_secondary    difmap
_atom_sites_solution_hydrogens    geom
_refine_ls_hydrogen_treatment     mixed
_refine_ls_extinction_method      none
_refine_ls_extinction_coef        ?
_refine_ls_number_reflns          3415
_refine_ls_number_parameters      226
_refine_ls_number_restraints      1
_refine_ls_R_factor_all           0.0357
_refine_ls_R_factor_gt            0.0342
_refine_ls_wR_factor_ref          0.0887
_refine_ls_wR_factor_gt           0.0876
_refine_ls_goodness_of_fit_ref    1.023
_refine_ls_restrained_S_all       1.024
_refine_ls_shift/su_max           0.075
_refine_ls_shift/su_mean          0.002

loop_
 _atom_site_label
 _atom_site_type_symbol
 _atom_site_fract_x
 _atom_site_fract_y
 _atom_site_fract_z
 _atom_site_U_iso_or_equiv
 _atom_site_adp_type
 _atom_site_occupancy
 _atom_site_symmetry_multiplicity
 _atom_site_calc_flag
 _atom_site_refinement_flags
 _atom_site_disorder_assembly
 _atom_site_disorder_group
Fe Fe 0.22514(2) 0.34634(3) 0.144620(18) 0.02106(11) Uani 1 1 d . . .
O O 0.33978(14) 0.43389(18) 0.30631(10) 0.0424(4) Uani 1 1 d . . .
C1 C 0.06115(19) 0.3843(3) 0.15147(17) 0.0378(5) Uani 1 1 d D . .
H1A H 0.015(2) 0.369(3) 0.1088(17) 0.061(10) Uiso 1 1 d D . .
H1B H 0.037(2) 0.380(3) 0.2003(15) 0.046(8) Uiso 1 1 d D . .
C2 C 0.11576(17) 0.5159(2) 0.14527(14) 0.0326(5) Uani 1 1 d . . .
C3 C 0.17095(16) 0.5311(2) 0.07267(14) 0.0303(4) Uani 1 1 d . . .
H3 H 0.131(2) 0.482(3) 0.0170(16) 0.036(6) Uiso 1 1 d . . .
C4 C 0.23893(17) 0.6559(2) 0.05313(14) 0.0295(4) Uani 1 1 d . . .
C5 C 0.21830(17) 0.7199(3) -0.02720(15) 0.0392(5) Uani 1 1 d . . .
H5 H 0.1623 0.6818 -0.0677 0.047 Uiso 1 1 calc R . .
C6 C 0.27854(19) 0.8386(3) -0.04870(17) 0.0442(6) Uani 1 1 d . . .
H6 H 0.2626 0.8820 -0.1032 0.053 Uiso 1 1 calc R . .
C7 C 0.36105(18) 0.8931(2) 0.00888(16) 0.0375(5) Uani 1 1 d . . .
H7 H 0.4013 0.9753 -0.0051 0.045 Uiso 1 1 calc R . .
C8 C 0.38488(18) 0.8277(2) 0.08678(15) 0.0351(5) Uani 1 1 d . . .
H8 H 0.4431 0.8638 0.1260 0.042 Uiso 1 1 calc R . .
C9 C 0.32559(18) 0.7101(2) 0.10900(14) 0.0325(5) Uani 1 1 d . . .
H9 H 0.3441 0.6658 0.1630 0.039 Uiso 1 1 calc R . .
C10 C 0.1197(2) 0.6269(3) 0.21558(16) 0.0388(5) Uani 1 1 d . . .
H10A H 0.0603 0.6966 0.2022 0.058 Uiso 1 1 calc R . .
H10B H 0.1897 0.6779 0.2209 0.058 Uiso 1 1 calc R . .
H10C H 0.1117 0.5782 0.2693 0.058 Uiso 1 1 calc R . .
C11 C 0.36381(16) 0.2221(2) 0.13234(13) 0.0290(4) Uani 1 1 d . . .
C12 C 0.31725(16) 0.2701(2) 0.05084(12) 0.0261(4) Uani 1 1 d . . .
C13 C 0.20904(16) 0.2116(2) 0.03494(12) 0.0254(4) Uani 1 1 d . . .
C14 C 0.18998(17) 0.1278(2) 0.10702(13) 0.0272(4) Uani 1 1 d . . .
C15 C 0.28422(17) 0.1351(2) 0.16793(13) 0.0282(4) Uani 1 1 d . . .
C16 C 0.47909(18) 0.2460(3) 0.17192(17) 0.0458(6) Uani 1 1 d . . .
H16A H 0.5247 0.1656 0.1569 0.069 Uiso 1 1 calc R . .
H16B H 0.4817 0.2510 0.2338 0.069 Uiso 1 1 calc R . .
H16C H 0.5063 0.3370 0.1508 0.069 Uiso 1 1 calc R . .
C17 C 0.3732(2) 0.3562(3) -0.01085(16) 0.0392(5) Uani 1 1 d . . .
H17A H 0.4327 0.4124 0.0202 0.059 Uiso 1 1 calc R . .
H17B H 0.3207 0.4221 -0.0425 0.059 Uiso 1 1 calc R . .
H17C H 0.4028 0.2903 -0.0506 0.059 Uiso 1 1 calc R . .
C18 C 0.13347(19) 0.2240(3) -0.04651(14) 0.0383(5) Uani 1 1 d . . .
H18A H 0.1352 0.1338 -0.0788 0.057 Uiso 1 1 calc R . .
H18B H 0.1566 0.3046 -0.0801 0.057 Uiso 1 1 calc R . .
H18C H 0.0591 0.2416 -0.0338 0.057 Uiso 1 1 calc R . .
C19 C 0.09126(19) 0.0373(3) 0.11393(16) 0.0410(5) Uani 1 1 d . . .
H19A H 0.1019 -0.0596 0.0912 0.062 Uiso 1 1 calc R . .
H19B H 0.0274 0.0826 0.0814 0.062 Uiso 1 1 calc R . .
H19C H 0.0798 0.0296 0.1737 0.062 Uiso 1 1 calc R . .
C20 C 0.3006(2) 0.0562(3) 0.25101(15) 0.0438(6) Uani 1 1 d . . .
H20A H 0.2316 0.0528 0.2751 0.066 Uiso 1 1 calc R . .
H20B H 0.3555 0.1068 0.2904 0.066 Uiso 1 1 calc R . .
H20C H 0.3255 -0.0426 0.2419 0.066 Uiso 1 1 calc R . .
C21 C 0.28897(17) 0.4072(2) 0.24206(14) 0.0302(4) Uani 1 1 d . . .

loop_
 _atom_site_aniso_label
 _atom_site_aniso_U_11
 _atom_site_aniso_U_22
 _atom_site_aniso_U_33
 _atom_site_aniso_U_23
 _atom_site_aniso_U_13
 _atom_site_aniso_U_12
Fe 0.01924(16) 0.02072(17) 0.02278(17) -0.00135(11) 0.00103(11) 0.00058(11)
O 0.0520(10) 0.0393(9) 0.0333(8) -0.0086(7) -0.0046(7) 0.0098(8)
C1 0.0294(11) 0.0392(13) 0.0448(14) 0.0056(11) 0.0052(10) 0.0021(10)
C2 0.0264(10) 0.0321(11) 0.0389(12) 0.0041(9) 0.0028(8) 0.0060(8)
C3 0.0252(10) 0.0318(11) 0.0327(11) 0.0010(9) -0.0010(8) 0.0029(8)
C4 0.0292(10) 0.0244(10) 0.0368(11) 0.0014(8) 0.0108(9) 0.0042(8)
C5 0.0254(10) 0.0547(15) 0.0367(12) 0.0054(11) 0.0007(9) -0.0008(10)
C6 0.0327(12) 0.0566(16) 0.0441(13) 0.0255(12) 0.0074(10) 0.0047(10)
C7 0.0334(11) 0.0280(11) 0.0540(14) 0.0058(10) 0.0174(10) 0.0024(9)
C8 0.0308(11) 0.0360(12) 0.0393(12) -0.0068(9) 0.0077(9) -0.0011(9)
C9 0.0344(11) 0.0331(11) 0.0299(10) 0.0020(9) 0.0042(8) 0.0062(9)
C10 0.0443(13) 0.0317(12) 0.0433(13) 0.0035(10) 0.0172(10) 0.0119(10)
C11 0.0223(9) 0.0306(11) 0.0329(10) -0.0111(9) -0.0016(8) 0.0055(8)
C12 0.0236(9) 0.0259(10) 0.0292(10) -0.0072(8) 0.0047(8) -0.0031(8)
C13 0.0253(9) 0.0245(10) 0.0256(9) -0.0050(8) 0.0003(7) -0.0036(8)
C14 0.0297(10) 0.0207(9) 0.0312(10) -0.0037(8) 0.0037(8) -0.0021(8)
C15 0.0345(11) 0.0229(10) 0.0265(10) -0.0041(8) 0.0013(8) 0.0076(8)
C16 0.0241(11) 0.0570(16) 0.0534(15) -0.0222(13) -0.0067(10) 0.0096(10)
C17 0.0386(12) 0.0406(13) 0.0418(13) -0.0079(10) 0.0177(10) -0.0087(10)
C18 0.0411(12) 0.0393(13) 0.0310(11) -0.0032(9) -0.0085(9) -0.0073(10)
C19 0.0403(13) 0.0331(12) 0.0506(14) -0.0009(10) 0.0094(11) -0.0107(10)
C20 0.0673(16) 0.0314(12) 0.0311(11) 0.0008(9) 0.0001(11) 0.0180(11)
C21 0.0300(10) 0.0229(10) 0.0372(11) -0.0010(9) 0.0026(9) 0.0058(8)

_geom_special_details
;
 All esds (except the esd in the dihedral angle between two l.s. planes)
 are estimated using the full covariance matrix.  The cell esds are taken
 into account individually in the estimation of esds in distances, angles
 and torsion angles; correlations between esds in cell parameters are only
 used when they are defined by crystal symmetry.  An approximate (isotropic)
 treatment of cell esds is used for estimating esds involving l.s. planes.
;

loop_
 _geom_bond_atom_site_label_1
 _geom_bond_atom_site_label_2
 _geom_bond_distance
 _geom_bond_site_symmetry_2
 _geom_bond_publ_flag
Fe C21 1.737(2) . ?
Fe C2 2.070(2) . ?
Fe C1 2.076(2) . ?
Fe C11 2.0941(19) . ?
Fe C15 2.099(2) . ?
Fe C12 2.1082(19) . ?
Fe C3 2.114(2) . ?
Fe C13 2.1278(19) . ?
Fe C14 2.134(2) . ?
O C21 1.153(3) . ?
C1 C2 1.400(3) . ?
C2 C3 1.420(3) . ?
C2 C10 1.512(3) . ?
C3 C4 1.483(3) . ?
C4 C9 1.394(3) . ?
C4 C5 1.399(3) . ?
C5 C6 1.393(3) . ?
C6 C7 1.375(4) . ?
C7 C8 1.373(3) . ?
C8 C9 1.381(3) . ?
C11 C12 1.418(3) . ?
C11 C15 1.441(3) . ?
C11 C16 1.499(3) . ?
C12 C13 1.436(3) . ?
C12 C17 1.498(3) . ?
C13 C14 1.425(3) . ?
C13 C18 1.499(3) . ?
C14 C15 1.417(3) . ?
C14 C19 1.496(3) . ?
C15 C20 1.497(3) . ?

loop_
 _geom_angle_atom_site_label_1
 _geom_angle_atom_site_label_2
 _geom_angle_atom_site_label_3
 _geom_angle
 _geom_angle_site_symmetry_1
 _geom_angle_site_symmetry_3
 _geom_angle_publ_flag
C21 Fe C2 88.49(9) . . ?
C21 Fe C1 103.56(10) . . ?
C2 Fe C1 39.46(9) . . ?
C21 Fe C11 88.62(9) . . ?
C2 Fe C11 163.51(9) . . ?
C1 Fe C11 156.29(9) . . ?
C21 Fe C15 92.04(9) . . ?
C2 Fe C15 156.19(9) . . ?
C1 Fe C15 117.93(9) . . ?
C11 Fe C15 40.19(9) . . ?
C21 Fe C12 120.74(9) . . ?
C2 Fe C12 131.99(8) . . ?
C1 Fe C12 135.57(9) . . ?
C11 Fe C12 39.43(8) . . ?
C15 Fe C12 66.83(8) . . ?
C21 Fe C3 107.22(9) . . ?
C2 Fe C3 39.65(8) . . ?
C1 Fe C3 69.36(9) . . ?
C11 Fe C3 126.80(9) . . ?
C15 Fe C3 157.59(8) . . ?
C12 Fe C3 92.93(8) . . ?
C21 Fe C13 154.34(9) . . ?
C2 Fe C13 116.99(8) . . ?
C1 Fe C13 98.76(9) . . ?
C11 Fe C13 66.11(8) . . ?
C15 Fe C13 66.08(8) . . ?
C12 Fe C13 39.62(7) . . ?
C3 Fe C13 92.33(8) . . ?
C21 Fe C14 127.45(9) . . ?
C2 Fe C14 127.37(8) . . ?
C1 Fe C14 90.52(9) . . ?
C11 Fe C14 66.13(8) . . ?
C15 Fe C14 39.11(8) . . ?
C12 Fe C14 66.17(8) . . ?
C3 Fe C14 125.00(8) . . ?
C13 Fe C14 39.08(8) . . ?
C2 C1 Fe 70.07(13) . . ?
C1 C2 C3 115.5(2) . . ?
C1 C2 C10 120.5(2) . . ?
C3 C2 C10 123.9(2) . . ?
C1 C2 Fe 70.47(13) . . ?
C3 C2 Fe 71.84(12) . . ?
C10 C2 Fe 123.89(15) . . ?
C2 C3 C4 126.3(2) . . ?
C2 C3 Fe 68.51(12) . . ?
C4 C3 Fe 126.25(14) . . ?
C9 C4 C5 117.6(2) . . ?
C9 C4 C3 123.9(2) . . ?
C5 C4 C3 118.5(2) . . ?
C6 C5 C4 121.0(2) . . ?
C7 C6 C5 120.0(2) . . ?
C8 C7 C6 119.5(2) . . ?
C7 C8 C9 121.1(2) . . ?
C8 C9 C4 120.7(2) . . ?
C12 C11 C15 108.30(17) . . ?
C12 C11 C16 126.1(2) . . ?
C15 C11 C16 125.4(2) . . ?
C12 C11 Fe 70.82(11) . . ?
C15 C11 Fe 70.10(11) . . ?
C16 C11 Fe 128.83(15) . . ?
C11 C12 C13 107.62(18) . . ?
C11 C12 C17 126.48(19) . . ?
C13 C12 C17 125.72(19) . . ?
C11 C12 Fe 69.75(11) . . ?
C13 C12 Fe 70.92(11) . . ?
C17 C12 Fe 128.41(15) . . ?
C14 C13 C12 108.06(17) . . ?
C14 C13 C18 125.73(18) . . ?
C12 C13 C18 125.95(19) . . ?
C14 C13 Fe 70.68(11) . . ?
C12 C13 Fe 69.46(11) . . ?
C18 C13 Fe 130.03(15) . . ?
C15 C14 C13 108.35(18) . . ?
C15 C14 C19 125.8(2) . . ?
C13 C14 C19 125.67(19) . . ?
C15 C14 Fe 69.13(11) . . ?
C13 C14 Fe 70.24(11) . . ?
C19 C14 Fe 130.34(16) . . ?
C14 C15 C11 107.65(18) . . ?
C14 C15 C20 125.7(2) . . ?
C11 C15 C20 126.5(2) . . ?
C14 C15 Fe 71.76(11) . . ?
C11 C15 Fe 69.71(11) . . ?
C20 C15 Fe 127.76(15) . . ?
O C21 Fe 171.82(18) . . ?

loop_
 _geom_torsion_atom_site_label_1
 _geom_torsion_atom_site_label_2
 _geom_torsion_atom_site_label_3
 _geom_torsion_atom_site_label_4
 _geom_torsion
 _geom_torsion_site_symmetry_1
 _geom_torsion_site_symmetry_2
 _geom_torsion_site_symmetry_3
 _geom_torsion_site_symmetry_4
 _geom_torsion_publ_flag
C21 Fe C1 C2 70.39(16) . . . . ?
C11 Fe C1 C2 -170.43(19) . . . . ?
C15 Fe C1 C2 170.14(13) . . . . ?
C12 Fe C1 C2 -105.34(16) . . . . ?
C3 Fe C1 C2 -33.17(13) . . . . ?
C13 Fe C1 C2 -122.36(14) . . . . ?
C14 Fe C1 C2 -160.73(14) . . . . ?
Fe C1 C2 C3 57.63(17) . . . . ?
Fe C1 C2 C10 -118.54(19) . . . . ?
C21 Fe C2 C1 -113.64(16) . . . . ?
C11 Fe C2 C1 166.4(3) . . . . ?
C15 Fe C2 C1 -22.0(3) . . . . ?
C12 Fe C2 C1 114.73(16) . . . . ?
C3 Fe C2 C1 126.6(2) . . . . ?
C13 Fe C2 C1 69.53(16) . . . . ?
C14 Fe C2 C1 24.53(18) . . . . ?
C21 Fe C2 C3 119.72(14) . . . . ?
C1 Fe C2 C3 -126.6(2) . . . . ?
C11 Fe C2 C3 39.7(3) . . . . ?
C15 Fe C2 C3 -148.65(19) . . . . ?
C12 Fe C2 C3 -11.91(17) . . . . ?
C13 Fe C2 C3 -57.10(14) . . . . ?
C14 Fe C2 C3 -102.10(14) . . . . ?
C21 Fe C2 C10 0.55(19) . . . . ?
C1 Fe C2 C10 114.2(2) . . . . ?
C11 Fe C2 C10 -79.4(4) . . . . ?
C15 Fe C2 C10 92.2(3) . . . . ?
C12 Fe C2 C10 -131.08(17) . . . . ?
C3 Fe C2 C10 -119.2(2) . . . . ?
C13 Fe C2 C10 -176.27(17) . . . . ?
C14 Fe C2 C10 138.73(17) . . . . ?
C1 C2 C3 C4 -176.9(2) . . . . ?
C10 C2 C3 C4 -0.8(3) . . . . ?
Fe C2 C3 C4 -120.0(2) . . . . ?
C1 C2 C3 Fe -56.91(17) . . . . ?
C10 C2 C3 Fe 119.1(2) . . . . ?
C21 Fe C3 C2 -65.35(14) . . . . ?
C1 Fe C3 C2 33.02(14) . . . . ?
C11 Fe C3 C2 -166.90(12) . . . . ?
C15 Fe C3 C2 146.6(2) . . . . ?
C12 Fe C3 C2 171.17(13) . . . . ?
C13 Fe C3 C2 131.51(13) . . . . ?
C14 Fe C3 C2 108.43(14) . . . . ?
C21 Fe C3 C4 54.7(2) . . . . ?
C2 Fe C3 C4 120.0(2) . . . . ?
C1 Fe C3 C4 153.0(2) . . . . ?
C11 Fe C3 C4 -46.9(2) . . . . ?
C15 Fe C3 C4 -93.4(3) . . . . ?
C12 Fe C3 C4 -68.82(19) . . . . ?
C13 Fe C3 C4 -108.48(19) . . . . ?
C14 Fe C3 C4 -131.56(17) . . . . ?
C2 C3 C4 C9 53.4(3) . . . . ?
Fe C3 C4 C9 -35.2(3) . . . . ?
C2 C3 C4 C5 -129.3(2) . . . . ?
Fe C3 C4 C5 142.13(18) . . . . ?
C9 C4 C5 C6 -3.4(3) . . . . ?
C3 C4 C5 C6 179.1(2) . . . . ?
C4 C5 C6 C7 1.2(4) . . . . ?
C5 C6 C7 C8 1.4(4) . . . . ?
C6 C7 C8 C9 -1.6(3) . . . . ?
C7 C8 C9 C4 -0.8(3) . . . . ?
C5 C4 C9 C8 3.2(3) . . . . ?
C3 C4 C9 C8 -179.4(2) . . . . ?
C21 Fe C11 C12 -146.55(13) . . . . ?
C2 Fe C11 C12 -66.6(3) . . . . ?
C1 Fe C11 C12 91.5(3) . . . . ?
C15 Fe C11 C12 118.65(16) . . . . ?
C3 Fe C11 C12 -35.96(15) . . . . ?
C13 Fe C11 C12 38.02(11) . . . . ?
C14 Fe C11 C12 80.94(12) . . . . ?
C21 Fe C11 C15 94.80(13) . . . . ?
C2 Fe C11 C15 174.8(3) . . . . ?
C1 Fe C11 C15 -27.1(3) . . . . ?
C12 Fe C11 C15 -118.65(16) . . . . ?
C3 Fe C11 C15 -154.61(12) . . . . ?
C13 Fe C11 C15 -80.63(12) . . . . ?
C14 Fe C11 C15 -37.72(12) . . . . ?
C21 Fe C11 C16 -25.2(2) . . . . ?
C2 Fe C11 C16 54.8(4) . . . . ?
C1 Fe C11 C16 -147.1(3) . . . . ?
C15 Fe C11 C16 -120.0(3) . . . . ?
C12 Fe C11 C16 121.4(3) . . . . ?
C3 Fe C11 C16 85.4(2) . . . . ?
C13 Fe C11 C16 159.4(2) . . . . ?
C14 Fe C11 C16 -157.7(2) . . . . ?
C15 C11 C12 C13 -0.8(2) . . . . ?
C16 C11 C12 C13 174.3(2) . . . . ?
Fe C11 C12 C13 -61.14(14) . . . . ?
C15 C11 C12 C17 -176.22(19) . . . . ?
C16 C11 C12 C17 -1.2(3) . . . . ?
Fe C11 C12 C17 123.4(2) . . . . ?
C15 C11 C12 Fe 60.35(14) . . . . ?
C16 C11 C12 Fe -124.6(2) . . . . ?
C21 Fe C12 C11 39.87(16) . . . . ?
C2 Fe C12 C11 159.49(13) . . . . ?
C1 Fe C12 C11 -144.96(14) . . . . ?
C15 Fe C12 C11 -38.03(12) . . . . ?
C3 Fe C12 C11 151.91(13) . . . . ?
C13 Fe C12 C11 -117.97(17) . . . . ?
C14 Fe C12 C11 -80.84(13) . . . . ?
C21 Fe C12 C13 157.85(13) . . . . ?
C2 Fe C12 C13 -82.54(15) . . . . ?
C1 Fe C12 C13 -26.98(18) . . . . ?
C11 Fe C12 C13 117.97(17) . . . . ?
C15 Fe C12 C13 79.95(13) . . . . ?
C3 Fe C12 C13 -90.11(12) . . . . ?
C14 Fe C12 C13 37.14(12) . . . . ?
C21 Fe C12 C17 -81.2(2) . . . . ?
C2 Fe C12 C17 38.4(2) . . . . ?
C1 Fe C12 C17 94.0(2) . . . . ?
C11 Fe C12 C17 -121.1(2) . . . . ?
C15 Fe C12 C17 -159.1(2) . . . . ?
C3 Fe C12 C17 30.8(2) . . . . ?
C13 Fe C12 C17 120.9(2) . . . . ?
C14 Fe C12 C17 158.1(2) . . . . ?
C11 C12 C13 C14 0.0(2) . . . . ?
C17 C12 C13 C14 175.47(19) . . . . ?
Fe C12 C13 C14 -60.40(14) . . . . ?
C11 C12 C13 C18 -174.4(2) . . . . ?
C17 C12 C13 C18 1.1(3) . . . . ?
Fe C12 C13 C18 125.2(2) . . . . ?
C11 C12 C13 Fe 60.39(14) . . . . ?
C17 C12 C13 Fe -124.1(2) . . . . ?
C21 Fe C13 C14 70.4(2) . . . . ?
C2 Fe C13 C14 -116.96(13) . . . . ?
C1 Fe C13 C14 -79.91(13) . . . . ?
C11 Fe C13 C14 80.99(13) . . . . ?
C15 Fe C13 C14 36.85(12) . . . . ?
C12 Fe C13 C14 118.84(17) . . . . ?
C3 Fe C13 C14 -149.38(12) . . . . ?
C21 Fe C13 C12 -48.5(3) . . . . ?
C2 Fe C13 C12 124.21(13) . . . . ?
C1 Fe C13 C12 161.25(13) . . . . ?
C11 Fe C13 C12 -37.84(12) . . . . ?
C15 Fe C13 C12 -81.99(13) . . . . ?
C3 Fe C13 C12 91.78(12) . . . . ?
C14 Fe C13 C12 -118.84(17) . . . . ?
C21 Fe C13 C18 -168.7(2) . . . . ?
C2 Fe C13 C18 3.9(2) . . . . ?
C1 Fe C13 C18 41.0(2) . . . . ?
C11 Fe C13 C18 -158.1(2) . . . . ?
C15 Fe C13 C18 157.7(2) . . . . ?
C12 Fe C13 C18 -120.3(2) . . . . ?
C3 Fe C13 C18 -28.5(2) . . . . ?
C14 Fe C13 C18 120.9(2) . . . . ?
C12 C13 C14 C15 0.8(2) . . . . ?
C18 C13 C14 C15 175.2(2) . . . . ?
Fe C13 C14 C15 -58.81(14) . . . . ?
C12 C13 C14 C19 -174.3(2) . . . . ?
C18 C13 C14 C19 0.1(3) . . . . ?
Fe C13 C14 C19 126.1(2) . . . . ?
C12 C13 C14 Fe 59.63(14) . . . . ?
C18 C13 C14 Fe -126.0(2) . . . . ?
C21 Fe C14 C15 -29.42(17) . . . . ?
C2 Fe C14 C15 -152.32(13) . . . . ?
C1 Fe C14 C15 -137.01(14) . . . . ?
C11 Fe C14 C15 38.74(13) . . . . ?
C12 Fe C14 C15 82.03(13) . . . . ?
C3 Fe C14 C15 158.08(12) . . . . ?
C13 Fe C14 C15 119.66(17) . . . . ?
C21 Fe C14 C13 -149.08(13) . . . . ?
C2 Fe C14 C13 88.02(14) . . . . ?
C1 Fe C14 C13 103.32(13) . . . . ?
C11 Fe C14 C13 -80.93(13) . . . . ?
C15 Fe C14 C13 -119.66(17) . . . . ?
C12 Fe C14 C13 -37.64(11) . . . . ?
C3 Fe C14 C13 38.41(15) . . . . ?
C21 Fe C14 C19 90.4(2) . . . . ?
C2 Fe C14 C19 -32.5(2) . . . . ?
C1 Fe C14 C19 -17.2(2) . . . . ?
C11 Fe C14 C19 158.6(2) . . . . ?
C15 Fe C14 C19 119.8(3) . . . . ?
C12 Fe C14 C19 -158.2(2) . . . . ?
C3 Fe C14 C19 -82.1(2) . . . . ?
C13 Fe C14 C19 -120.5(3) . . . . ?
C13 C14 C15 C11 -1.3(2) . . . . ?
C19 C14 C15 C11 173.8(2) . . . . ?
Fe C14 C15 C11 -60.80(13) . . . . ?
C13 C14 C15 C20 -176.66(19) . . . . ?
C19 C14 C15 C20 -1.5(3) . . . . ?
Fe C14 C15 C20 123.9(2) . . . . ?
C13 C14 C15 Fe 59.49(14) . . . . ?
C19 C14 C15 Fe -125.4(2) . . . . ?
C12 C11 C15 C14 1.3(2) . . . . ?
C16 C11 C15 C14 -173.78(19) . . . . ?
Fe C11 C15 C14 62.11(13) . . . . ?
C12 C11 C15 C20 176.60(19) . . . . ?
C16 C11 C15 C20 1.5(3) . . . . ?
Fe C11 C15 C20 -122.6(2) . . . . ?
C12 C11 C15 Fe -60.81(14) . . . . ?
C16 C11 C15 Fe 124.1(2) . . . . ?
C21 Fe C15 C14 157.03(13) . . . . ?
C2 Fe C15 C14 66.2(2) . . . . ?
C1 Fe C15 C14 50.51(16) . . . . ?
C11 Fe C15 C14 -117.53(17) . . . . ?
C12 Fe C15 C14 -80.20(13) . . . . ?
C3 Fe C15 C14 -53.3(3) . . . . ?
C13 Fe C15 C14 -36.82(12) . . . . ?
C21 Fe C15 C11 -85.44(13) . . . . ?
C2 Fe C15 C11 -176.32(19) . . . . ?
C1 Fe C15 C11 168.03(13) . . . . ?
C12 Fe C15 C11 37.32(11) . . . . ?
C3 Fe C15 C11 64.2(3) . . . . ?
C13 Fe C15 C11 80.71(12) . . . . ?
C14 Fe C15 C11 117.53(17) . . . . ?
C21 Fe C15 C20 35.6(2) . . . . ?
C2 Fe C15 C20 -55.3(3) . . . . ?
C1 Fe C15 C20 -71.0(2) . . . . ?
C11 Fe C15 C20 121.0(3) . . . . ?
C12 Fe C15 C20 158.3(2) . . . . ?
C3 Fe C15 C20 -174.8(2) . . . . ?
C13 Fe C15 C20 -158.3(2) . . . . ?
C14 Fe C15 C20 -121.5(3) . . . . ?
C2 Fe C21 O -180(100) . . . . ?
C1 Fe C21 O 143.3(14) . . . . ?
C11 Fe C21 O -16.1(14) . . . . ?
C15 Fe C21 O 23.9(14) . . . . ?
C12 Fe C21 O -40.2(15) . . . . ?
C3 Fe C21 O -144.4(14) . . . . ?
C13 Fe C21 O -6.4(16) . . . . ?
C14 Fe C21 O 42.0(15) . . . . ?

_diffrn_measured_fraction_theta_max    1.000
_diffrn_reflns_theta_full              70.07
_diffrn_measured_fraction_theta_full   1.000
_refine_diff_density_max    0.551
_refine_diff_density_min   -0.223
_refine_diff_density_rms    0.049


#=============================================================================
#  end of cif data for "andyg69" (compound syn-2)
#=============================================================================

#=============================================================================
#  cif data for "andyg52" (compound syn-3)
#=============================================================================


data_andyg52

_audit_creation_method            SHELXL-97
_chemical_name_systematic
;
 ?
;
_chemical_name_common             ?
_chemical_melting_point           ?
_chemical_formula_moiety          ?
_chemical_formula_sum
 'C27 H38 Fe N2'
_chemical_formula_weight          446.44

loop_
 _atom_type_symbol
 _atom_type_description
 _atom_type_scat_dispersion_real
 _atom_type_scat_dispersion_imag
 _atom_type_scat_source
 'C'  'C'   0.0033   0.0016
 'International Tables Vol C Tables 4.2.6.8 and 6.1.1.4'
 'H'  'H'   0.0000   0.0000
 'International Tables Vol C Tables 4.2.6.8 and 6.1.1.4'
 'Fe'  'Fe'   0.3463   0.8444
 'International Tables Vol C Tables 4.2.6.8 and 6.1.1.4'
 'N'  'N'   0.0061   0.0033
 'International Tables Vol C Tables 4.2.6.8 and 6.1.1.4'

_symmetry_cell_setting            monoclinic
_symmetry_space_group_name_H-M    'P 21/n'

loop_
 _symmetry_equiv_pos_as_xyz
 'x, y, z'
 '-x+1/2, y+1/2, -z+1/2'
 '-x, -y, -z'
 'x-1/2, -y-1/2, z-1/2'

_cell_length_a                    14.6168(2)
_cell_length_b                    8.2424(2)
_cell_length_c                    19.4457(4)
_cell_angle_alpha                 90.00
_cell_angle_beta                  91.592(2)
_cell_angle_gamma                 90.00
_cell_volume                      2341.86(8)
_cell_formula_units_Z             4
_cell_measurement_temperature     100(2)
_cell_measurement_reflns_used     38561
_cell_measurement_theta_min       2.4660
_cell_measurement_theta_max       29.2913

_exptl_crystal_description        prism
_exptl_crystal_colour             'wine red'
_exptl_crystal_size_max           0.24
_exptl_crystal_size_mid           0.12
_exptl_crystal_size_min           0.10
_exptl_crystal_density_meas       ?
_exptl_crystal_density_diffrn     1.266
_exptl_crystal_density_method     'not measured'
_exptl_crystal_F_000              960
_exptl_absorpt_coefficient_mu     0.660
_exptl_absorpt_correction_type    multi-scan
_exptl_absorpt_correction_T_min   0.95120
_exptl_absorpt_correction_T_max   1.00000
_exptl_absorpt_process_details
;
CrysAlisPro, Oxford Diffraction Ltd.,
Version 1.171.34.44 (release 25-10-2010 CrysAlis171 .NET)
(compiled Oct 25 2010,18:11:34)
;

_exptl_special_details
;
 ?
;

_diffrn_ambient_temperature       100(2)
_diffrn_radiation_wavelength      0.71073
_diffrn_radiation_type            'Mo K\a'
_diffrn_radiation_source          'Enhance (Mo) X-ray Source'
_diffrn_radiation_monochromator   graphite
_diffrn_measurement_device_type   'Oxford Diffraction Xcalibur, Eos'
_diffrn_measurement_method        '\w scans'
_diffrn_detector_area_resol_mean  16.1419
_diffrn_standards_number          ?
_diffrn_standards_interval_count  ?
_diffrn_standards_interval_time   ?
_diffrn_standards_decay_%         ?
_diffrn_reflns_number             92882
_diffrn_reflns_av_R_equivalents   0.0344
_diffrn_reflns_av_sigmaI/netI     0.0139
_diffrn_reflns_limit_h_min        -18
_diffrn_reflns_limit_h_max        18
_diffrn_reflns_limit_k_min        -10
_diffrn_reflns_limit_k_max        10
_diffrn_reflns_limit_l_min        -25
_diffrn_reflns_limit_l_max        25
_diffrn_reflns_theta_min          2.68
_diffrn_reflns_theta_max          27.48
_reflns_number_total              5363
_reflns_number_gt                 4921
_reflns_threshold_expression      >2sigma(I)

_computing_data_collection
;
CrysAlisPro, Oxford Diffraction Ltd.,
Version 1.171.34.44 (release 25-10-2010 CrysAlis171 .NET)
(compiled Oct 25 2010,18:11:34)
;
_computing_cell_refinement
;
CrysAlisPro, Oxford Diffraction Ltd.,
Version 1.171.34.44 (release 25-10-2010 CrysAlis171 .NET)
(compiled Oct 25 2010,18:11:34)
;
_computing_data_reduction
;
CrysAlisPro, Oxford Diffraction Ltd.,
Version 1.171.34.44 (release 25-10-2010 CrysAlis171 .NET)
(compiled Oct 25 2010,18:11:34)
;
_computing_structure_solution     'SHELXS-97 (Sheldrick, 1990)'
_computing_structure_refinement   'SHELXL-97 (Sheldrick, 1997)'
_computing_molecular_graphics     'BRUKER XP'
_computing_publication_material   'SHELXL-97'

_refine_special_details
;
 Refinement of F^2^ against ALL reflections.  The weighted R-factor wR and
 goodness of fit S are based on F^2^, conventional R-factors R are based
 on F, with F set to zero for negative F^2^. The threshold expression of
 F^2^ > 2sigma(F^2^) is used only for calculating R-factors(gt) etc. and is
 not relevant to the choice of reflections for refinement.  R-factors based
 on F^2^ are statistically about twice as large as those based on F, and R-
 factors based on ALL data will be even larger.

 The hydrogens of the C1 and C3 atoms were refined freely.
;

_refine_ls_structure_factor_coef  Fsqd
_refine_ls_matrix_type            full
_refine_ls_weighting_scheme       calc
_refine_ls_weighting_details
 'calc w=1/[\s^2^(Fo^2^)+(0.0320P)^2^+1.1580P] where P=(Fo^2^+2Fc^2^)/3'
_atom_sites_solution_primary      direct
_atom_sites_solution_secondary    difmap
_atom_sites_solution_hydrogens    geom
_refine_ls_hydrogen_treatment     mixed
_refine_ls_extinction_method      none
_refine_ls_extinction_coef        ?
_refine_ls_number_reflns          5363
_refine_ls_number_parameters      293
_refine_ls_number_restraints      0
_refine_ls_R_factor_all           0.0297
_refine_ls_R_factor_gt            0.0261
_refine_ls_wR_factor_ref          0.0672
_refine_ls_wR_factor_gt           0.0652
_refine_ls_goodness_of_fit_ref    1.047
_refine_ls_restrained_S_all       1.047
_refine_ls_shift/su_max           0.002
_refine_ls_shift/su_mean          0.000

loop_
 _atom_site_label
 _atom_site_type_symbol
 _atom_site_fract_x
 _atom_site_fract_y
 _atom_site_fract_z
 _atom_site_U_iso_or_equiv
 _atom_site_adp_type
 _atom_site_occupancy
 _atom_site_symmetry_multiplicity
 _atom_site_calc_flag
 _atom_site_refinement_flags
 _atom_site_disorder_assembly
 _atom_site_disorder_group
Fe Fe 0.773450(11) 0.78322(2) 0.523679(8) 0.01065(6) Uani 1 1 d . . .
N1 N 0.74198(7) 0.87323(13) 0.37388(5) 0.0150(2) Uani 1 1 d . . .
N2 N 0.62757(7) 0.74515(13) 0.41291(5) 0.0156(2) Uani 1 1 d . . .
C1 C 0.79553(9) 1.03140(15) 0.52487(6) 0.0170(2) Uani 1 1 d . . .
H1A H 0.7619(11) 1.0821(19) 0.4867(8) 0.021(4) Uiso 1 1 d . . .
H1B H 0.8570(11) 1.0759(19) 0.5323(8) 0.022(4) Uiso 1 1 d . . .
C2 C 0.74652(8) 0.97871(15) 0.58301(6) 0.0160(2) Uani 1 1 d . . .
C3 C 0.65854(8) 0.91054(15) 0.56740(6) 0.0154(2) Uani 1 1 d . . .
H3 H 0.6280(9) 0.9570(17) 0.5259(7) 0.012(3) Uiso 1 1 d . . .
C4 C 0.59051(8) 0.85152(15) 0.61579(6) 0.0164(2) Uani 1 1 d . . .
C5 C 0.49732(9) 0.86727(16) 0.59684(7) 0.0194(3) Uani 1 1 d . . .
H5 H 0.4813 0.9155 0.5538 0.023 Uiso 1 1 calc R . .
C6 C 0.42804(9) 0.81505(17) 0.63866(8) 0.0244(3) Uani 1 1 d . . .
H6 H 0.3659 0.8262 0.6237 0.029 Uiso 1 1 calc R . .
C7 C 0.44906(10) 0.7468(2) 0.70205(9) 0.0322(3) Uani 1 1 d . . .
H7 H 0.4018 0.7124 0.7312 0.039 Uiso 1 1 calc R . .
C8 C 0.54002(11) 0.7292(2) 0.72237(8) 0.0332(4) Uani 1 1 d . . .
H8 H 0.5551 0.6827 0.7659 0.040 Uiso 1 1 calc R . .
C9 C 0.60957(9) 0.77858(18) 0.67987(7) 0.0254(3) Uani 1 1 d . . .
H9 H 0.6715 0.7627 0.6945 0.030 Uiso 1 1 calc R . .
C10 C 0.78506(10) 1.01343(17) 0.65444(7) 0.0233(3) Uani 1 1 d . . .
H10A H 0.8521 1.0154 0.6535 0.035 Uiso 1 1 calc R . .
H10B H 0.7654 0.9285 0.6861 0.035 Uiso 1 1 calc R . .
H10C H 0.7627 1.1189 0.6700 0.035 Uiso 1 1 calc R . .
C11 C 0.90300(8) 0.70389(15) 0.55727(6) 0.0166(2) Uani 1 1 d . . .
C12 C 0.88438(8) 0.64904(15) 0.48897(6) 0.0162(2) Uani 1 1 d . . .
C13 C 0.80520(8) 0.54599(15) 0.49128(6) 0.0164(2) Uani 1 1 d . . .
C14 C 0.77578(8) 0.53832(15) 0.56004(6) 0.0162(2) Uani 1 1 d . . .
C15 C 0.83731(8) 0.63380(15) 0.60133(6) 0.0166(2) Uani 1 1 d . . .
C16 C 0.98492(9) 0.80222(18) 0.57991(8) 0.0263(3) Uani 1 1 d . . .
H16A H 1.0377 0.7303 0.5870 0.040 Uiso 1 1 calc R . .
H16B H 0.9720 0.8580 0.6231 0.040 Uiso 1 1 calc R . .
H16C H 0.9985 0.8825 0.5444 0.040 Uiso 1 1 calc R . .
C17 C 0.94706(10) 0.66561(18) 0.42927(7) 0.0250(3) Uani 1 1 d . . .
H17A H 0.9775 0.7715 0.4314 0.037 Uiso 1 1 calc R . .
H17B H 0.9113 0.6568 0.3860 0.037 Uiso 1 1 calc R . .
H17C H 0.9932 0.5793 0.4315 0.037 Uiso 1 1 calc R . .
C18 C 0.76703(10) 0.45097(17) 0.43143(7) 0.0245(3) Uani 1 1 d . . .
H18A H 0.8042 0.3535 0.4249 0.037 Uiso 1 1 calc R . .
H18B H 0.7681 0.5179 0.3898 0.037 Uiso 1 1 calc R . .
H18C H 0.7038 0.4193 0.4404 0.037 Uiso 1 1 calc R . .
C19 C 0.70039(9) 0.43426(17) 0.58684(8) 0.0252(3) Uani 1 1 d . . .
H19A H 0.7269 0.3450 0.6141 0.038 Uiso 1 1 calc R . .
H19B H 0.6641 0.3899 0.5481 0.038 Uiso 1 1 calc R . .
H19C H 0.6610 0.4999 0.6158 0.038 Uiso 1 1 calc R . .
C20 C 0.84578(10) 0.62713(19) 0.67838(7) 0.0266(3) Uani 1 1 d . . .
H20A H 0.7863 0.5998 0.6973 0.040 Uiso 1 1 calc R . .
H20B H 0.8658 0.7330 0.6961 0.040 Uiso 1 1 calc R . .
H20C H 0.8908 0.5442 0.6921 0.040 Uiso 1 1 calc R . .
C21 C 0.71083(8) 0.80637(14) 0.43352(6) 0.0134(2) Uani 1 1 d . . .
C22 C 0.67986(9) 0.85245(16) 0.31853(6) 0.0185(2) Uani 1 1 d . . .
C23 C 0.60782(9) 0.77184(16) 0.34331(6) 0.0198(3) Uani 1 1 d . . .
C24 C 0.82581(9) 0.96617(16) 0.36773(6) 0.0186(2) Uani 1 1 d . . .
H24A H 0.8106 1.0797 0.3578 0.028 Uiso 1 1 calc R . .
H24B H 0.8617 0.9216 0.3303 0.028 Uiso 1 1 calc R . .
H24C H 0.8617 0.9598 0.4110 0.028 Uiso 1 1 calc R . .
C25 C 0.69583(10) 0.91715(18) 0.24846(7) 0.0262(3) Uani 1 1 d . . .
H25A H 0.6406 0.9017 0.2194 0.039 Uiso 1 1 calc R . .
H25B H 0.7472 0.8593 0.2283 0.039 Uiso 1 1 calc R . .
H25C H 0.7102 1.0331 0.2515 0.039 Uiso 1 1 calc R . .
C26 C 0.51887(10) 0.7242(2) 0.30989(8) 0.0305(3) Uani 1 1 d . . .
H26A H 0.4693 0.7871 0.3299 0.046 Uiso 1 1 calc R . .
H26B H 0.5081 0.6083 0.3174 0.046 Uiso 1 1 calc R . .
H26C H 0.5207 0.7458 0.2604 0.046 Uiso 1 1 calc R . .
C27 C 0.56588(8) 0.65517(16) 0.45627(7) 0.0200(3) Uani 1 1 d . . .
H27A H 0.5928 0.6463 0.5028 0.030 Uiso 1 1 calc R . .
H27B H 0.5561 0.5463 0.4372 0.030 Uiso 1 1 calc R . .
H27C H 0.5072 0.7122 0.4580 0.030 Uiso 1 1 calc R . .

loop_
 _atom_site_aniso_label
 _atom_site_aniso_U_11
 _atom_site_aniso_U_22
 _atom_site_aniso_U_33
 _atom_site_aniso_U_23
 _atom_site_aniso_U_13
 _atom_site_aniso_U_12
Fe 0.01042(9) 0.01167(9) 0.00981(9) 0.00012(6) -0.00072(6) 0.00006(6)
N1 0.0170(5) 0.0165(5) 0.0115(5) 0.0003(4) -0.0006(4) 0.0014(4)
N2 0.0147(5) 0.0173(5) 0.0147(5) -0.0005(4) -0.0033(4) -0.0006(4)
C1 0.0201(6) 0.0135(6) 0.0173(6) -0.0020(5) 0.0009(5) -0.0020(5)
C2 0.0207(6) 0.0130(5) 0.0143(6) -0.0023(4) 0.0005(4) 0.0016(5)
C3 0.0174(6) 0.0160(6) 0.0130(5) 0.0013(4) 0.0010(4) 0.0047(5)
C4 0.0175(6) 0.0153(6) 0.0164(6) 0.0002(5) 0.0028(4) 0.0038(5)
C5 0.0196(6) 0.0195(6) 0.0190(6) 0.0007(5) 0.0014(5) 0.0049(5)
C6 0.0169(6) 0.0239(7) 0.0325(7) 0.0004(6) 0.0043(5) 0.0037(5)
C7 0.0249(7) 0.0359(8) 0.0365(8) 0.0136(7) 0.0138(6) 0.0028(6)
C8 0.0299(8) 0.0436(9) 0.0266(7) 0.0189(7) 0.0072(6) 0.0066(7)
C9 0.0194(6) 0.0341(8) 0.0228(7) 0.0095(6) 0.0022(5) 0.0060(6)
C10 0.0305(7) 0.0221(7) 0.0170(6) -0.0058(5) -0.0020(5) -0.0015(5)
C11 0.0116(5) 0.0176(6) 0.0206(6) 0.0016(5) -0.0022(4) 0.0023(4)
C12 0.0141(5) 0.0164(6) 0.0181(6) 0.0010(5) 0.0015(4) 0.0037(5)
C13 0.0158(6) 0.0132(5) 0.0200(6) -0.0012(5) -0.0012(5) 0.0035(4)
C14 0.0147(6) 0.0131(5) 0.0208(6) 0.0024(5) 0.0007(5) 0.0021(4)
C15 0.0163(6) 0.0178(6) 0.0156(6) 0.0032(5) -0.0018(4) 0.0041(5)
C16 0.0155(6) 0.0308(7) 0.0323(7) -0.0024(6) -0.0053(5) -0.0025(5)
C17 0.0238(7) 0.0253(7) 0.0262(7) 0.0043(6) 0.0099(5) 0.0083(5)
C18 0.0249(7) 0.0200(6) 0.0283(7) -0.0104(5) -0.0029(5) 0.0035(5)
C19 0.0215(6) 0.0174(6) 0.0369(8) 0.0066(6) 0.0058(6) -0.0014(5)
C20 0.0299(7) 0.0334(8) 0.0161(6) 0.0056(5) -0.0028(5) 0.0102(6)
C21 0.0138(5) 0.0124(5) 0.0141(5) -0.0010(4) 0.0010(4) 0.0017(4)
C22 0.0233(6) 0.0195(6) 0.0125(6) -0.0015(5) -0.0044(5) 0.0041(5)
C23 0.0221(6) 0.0216(6) 0.0154(6) -0.0018(5) -0.0056(5) 0.0028(5)
C24 0.0200(6) 0.0200(6) 0.0160(6) 0.0015(5) 0.0038(5) -0.0017(5)
C25 0.0334(7) 0.0311(7) 0.0139(6) 0.0029(5) -0.0020(5) 0.0059(6)
C26 0.0273(7) 0.0387(8) 0.0246(7) -0.0022(6) -0.0127(6) -0.0018(6)
C27 0.0149(6) 0.0238(6) 0.0214(6) -0.0002(5) -0.0006(5) -0.0051(5)

_geom_special_details
;
 All esds (except the esd in the dihedral angle between two l.s. planes)
 are estimated using the full covariance matrix.  The cell esds are taken
 into account individually in the estimation of esds in distances, angles
 and torsion angles; correlations between esds in cell parameters are only
 used when they are defined by crystal symmetry.  An approximate (isotropic)
 treatment of cell esds is used for estimating esds involving l.s. planes.
;

loop_
 _geom_bond_atom_site_label_1
 _geom_bond_atom_site_label_2
 _geom_bond_distance
 _geom_bond_site_symmetry_2
 _geom_bond_publ_flag
Fe C21 1.9644(12) . ?
Fe C2 2.0267(12) . ?
Fe C1 2.0709(13) . ?
Fe C12 2.0901(12) . ?
Fe C11 2.0907(12) . ?
Fe C13 2.1100(12) . ?
Fe C14 2.1388(12) . ?
Fe C15 2.1423(12) . ?
Fe C3 2.1736(12) . ?
N1 C21 1.3732(15) . ?
N1 C22 1.3993(15) . ?
N1 C24 1.4527(16) . ?
N2 C21 1.3672(15) . ?
N2 C23 1.3935(16) . ?
N2 C27 1.4547(16) . ?
C1 C2 1.4229(17) . ?
C2 C3 1.4283(17) . ?
C2 C10 1.5118(17) . ?
C3 C4 1.4705(16) . ?
C4 C9 1.4045(18) . ?
C4 C5 1.4073(17) . ?
C5 C6 1.3847(19) . ?
C6 C7 1.382(2) . ?
C7 C8 1.384(2) . ?
C8 C9 1.389(2) . ?
C11 C12 1.4222(17) . ?
C11 C15 1.4265(17) . ?
C11 C16 1.5018(18) . ?
C12 C13 1.4373(17) . ?
C12 C17 1.5049(17) . ?
C13 C14 1.4172(17) . ?
C13 C18 1.4978(17) . ?
C14 C15 1.4257(17) . ?
C14 C19 1.5012(17) . ?
C15 C20 1.5010(17) . ?
C22 C23 1.3455(19) . ?
C22 C25 1.4877(17) . ?
C23 C26 1.4900(18) . ?

loop_
 _geom_angle_atom_site_label_1
 _geom_angle_atom_site_label_2
 _geom_angle_atom_site_label_3
 _geom_angle
 _geom_angle_site_symmetry_1
 _geom_angle_site_symmetry_3
 _geom_angle_publ_flag
C21 Fe C2 109.74(5) . . ?
C21 Fe C1 89.01(5) . . ?
C2 Fe C1 40.62(5) . . ?
C21 Fe C12 96.29(5) . . ?
C2 Fe C12 140.28(5) . . ?
C1 Fe C12 113.84(5) . . ?
C21 Fe C11 134.81(5) . . ?
C2 Fe C11 105.03(5) . . ?
C1 Fe C11 99.55(5) . . ?
C12 Fe C11 39.77(5) . . ?
C21 Fe C13 85.67(5) . . ?
C2 Fe C13 162.66(5) . . ?
C1 Fe C13 152.03(5) . . ?
C12 Fe C13 40.02(5) . . ?
C11 Fe C13 66.34(5) . . ?
C21 Fe C14 112.92(5) . . ?
C2 Fe C14 124.32(5) . . ?
C1 Fe C14 158.05(5) . . ?
C12 Fe C14 66.55(5) . . ?
C11 Fe C14 66.14(5) . . ?
C13 Fe C14 38.96(5) . . ?
C21 Fe C15 150.22(5) . . ?
C2 Fe C15 98.26(5) . . ?
C1 Fe C15 119.69(5) . . ?
C12 Fe C15 66.21(5) . . ?
C11 Fe C15 39.36(5) . . ?
C13 Fe C15 65.32(5) . . ?
C14 Fe C15 38.90(5) . . ?
C21 Fe C3 87.49(5) . . ?
C2 Fe C3 39.57(5) . . ?
C1 Fe C3 68.94(5) . . ?
C12 Fe C3 175.27(5) . . ?
C11 Fe C3 137.03(5) . . ?
C13 Fe C3 137.98(5) . . ?
C14 Fe C3 109.37(5) . . ?
C15 Fe C3 109.16(5) . . ?
C21 N1 C22 112.15(10) . . ?
C21 N1 C24 125.55(10) . . ?
C22 N1 C24 122.15(10) . . ?
C21 N2 C23 112.65(10) . . ?
C21 N2 C27 125.40(10) . . ?
C23 N2 C27 121.90(11) . . ?
C2 C1 Fe 68.02(7) . . ?
C1 C2 C3 114.93(11) . . ?
C1 C2 C10 119.29(11) . . ?
C3 C2 C10 125.45(11) . . ?
C1 C2 Fe 71.36(7) . . ?
C3 C2 Fe 75.77(7) . . ?
C10 C2 Fe 126.89(9) . . ?
C2 C3 C4 127.96(11) . . ?
C2 C3 Fe 64.66(6) . . ?
C4 C3 Fe 129.36(9) . . ?
C9 C4 C5 116.01(11) . . ?
C9 C4 C3 126.03(11) . . ?
C5 C4 C3 117.96(11) . . ?
C6 C5 C4 122.40(12) . . ?
C7 C6 C5 120.15(13) . . ?
C6 C7 C8 119.04(13) . . ?
C7 C8 C9 120.83(14) . . ?
C8 C9 C4 121.54(13) . . ?
C12 C11 C15 108.52(11) . . ?
C12 C11 C16 125.15(12) . . ?
C15 C11 C16 125.94(12) . . ?
C12 C11 Fe 70.09(7) . . ?
C15 C11 Fe 72.27(7) . . ?
C16 C11 Fe 129.10(9) . . ?
C11 C12 C13 106.97(10) . . ?
C11 C12 C17 125.93(12) . . ?
C13 C12 C17 125.86(12) . . ?
C11 C12 Fe 70.14(7) . . ?
C13 C12 Fe 70.73(7) . . ?
C17 C12 Fe 134.06(9) . . ?
C14 C13 C12 108.76(11) . . ?
C14 C13 C18 126.42(12) . . ?
C12 C13 C18 124.58(11) . . ?
C14 C13 Fe 71.62(7) . . ?
C12 C13 Fe 69.25(7) . . ?
C18 C13 Fe 129.52(9) . . ?
C13 C14 C15 107.67(10) . . ?
C13 C14 C19 126.72(12) . . ?
C15 C14 C19 125.28(12) . . ?
C13 C14 Fe 69.42(7) . . ?
C15 C14 Fe 70.68(7) . . ?
C19 C14 Fe 130.46(9) . . ?
C14 C15 C11 108.06(11) . . ?
C14 C15 C20 125.11(12) . . ?
C11 C15 C20 125.17(12) . . ?
C14 C15 Fe 70.41(7) . . ?
C11 C15 Fe 68.37(7) . . ?
C20 C15 Fe 138.31(9) . . ?
N2 C21 N1 102.35(10) . . ?
N2 C21 Fe 127.93(9) . . ?
N1 C21 Fe 129.46(9) . . ?
C23 C22 N1 106.42(11) . . ?
C23 C22 C25 130.49(12) . . ?
N1 C22 C25 123.06(12) . . ?
C22 C23 N2 106.42(11) . . ?
C22 C23 C26 131.00(12) . . ?
N2 C23 C26 122.45(12) . . ?

loop_
 _geom_torsion_atom_site_label_1
 _geom_torsion_atom_site_label_2
 _geom_torsion_atom_site_label_3
 _geom_torsion_atom_site_label_4
 _geom_torsion
 _geom_torsion_site_symmetry_1
 _geom_torsion_site_symmetry_2
 _geom_torsion_site_symmetry_3
 _geom_torsion_site_symmetry_4
 _geom_torsion_publ_flag
C21 Fe C1 C2 122.62(8) . . . . ?
C12 Fe C1 C2 -140.94(7) . . . . ?
C11 Fe C1 C2 -101.99(8) . . . . ?
C13 Fe C1 C2 -158.55(10) . . . . ?
C14 Fe C1 C2 -54.81(16) . . . . ?
C15 Fe C1 C2 -65.75(8) . . . . ?
C3 Fe C1 C2 34.93(7) . . . . ?
Fe C1 C2 C3 -63.72(9) . . . . ?
Fe C1 C2 C10 122.49(11) . . . . ?
C21 Fe C2 C1 -63.47(8) . . . . ?
C12 Fe C2 C1 64.42(10) . . . . ?
C11 Fe C2 C1 87.18(8) . . . . ?
C13 Fe C2 C1 144.88(15) . . . . ?
C14 Fe C2 C1 158.29(7) . . . . ?
C15 Fe C2 C1 126.83(8) . . . . ?
C3 Fe C2 C1 -122.99(10) . . . . ?
C21 Fe C2 C3 59.51(8) . . . . ?
C1 Fe C2 C3 122.99(10) . . . . ?
C12 Fe C2 C3 -172.59(7) . . . . ?
C11 Fe C2 C3 -149.83(7) . . . . ?
C13 Fe C2 C3 -92.14(17) . . . . ?
C14 Fe C2 C3 -78.72(8) . . . . ?
C15 Fe C2 C3 -110.18(7) . . . . ?
C21 Fe C2 C10 -176.58(11) . . . . ?
C1 Fe C2 C10 -113.11(14) . . . . ?
C12 Fe C2 C10 -48.69(15) . . . . ?
C11 Fe C2 C10 -25.93(12) . . . . ?
C13 Fe C2 C10 31.8(2) . . . . ?
C14 Fe C2 C10 45.18(13) . . . . ?
C15 Fe C2 C10 13.72(12) . . . . ?
C3 Fe C2 C10 123.90(14) . . . . ?
C1 C2 C3 C4 -177.41(12) . . . . ?
C10 C2 C3 C4 -4.1(2) . . . . ?
Fe C2 C3 C4 121.37(12) . . . . ?
C1 C2 C3 Fe 61.22(9) . . . . ?
C10 C2 C3 Fe -125.43(13) . . . . ?
C21 Fe C3 C2 -125.72(8) . . . . ?
C1 Fe C3 C2 -35.82(7) . . . . ?
C12 Fe C3 C2 91.0(6) . . . . ?
C11 Fe C3 C2 45.41(10) . . . . ?
C13 Fe C3 C2 153.58(8) . . . . ?
C14 Fe C3 C2 120.84(7) . . . . ?
C15 Fe C3 C2 79.53(8) . . . . ?
C21 Fe C3 C4 114.82(11) . . . . ?
C2 Fe C3 C4 -119.46(14) . . . . ?
C1 Fe C3 C4 -155.27(12) . . . . ?
C12 Fe C3 C4 -28.5(6) . . . . ?
C11 Fe C3 C4 -74.05(13) . . . . ?
C13 Fe C3 C4 34.12(14) . . . . ?
C14 Fe C3 C4 1.38(12) . . . . ?
C15 Fe C3 C4 -39.93(12) . . . . ?
C2 C3 C4 C9 -32.6(2) . . . . ?
Fe C3 C4 C9 53.83(18) . . . . ?
C2 C3 C4 C5 147.95(13) . . . . ?
Fe C3 C4 C5 -125.62(11) . . . . ?
C9 C4 C5 C6 0.29(19) . . . . ?
C3 C4 C5 C6 179.79(12) . . . . ?
C4 C5 C6 C7 1.0(2) . . . . ?
C5 C6 C7 C8 -1.0(2) . . . . ?
C6 C7 C8 C9 -0.2(3) . . . . ?
C7 C8 C9 C4 1.6(3) . . . . ?
C5 C4 C9 C8 -1.6(2) . . . . ?
C3 C4 C9 C8 178.96(14) . . . . ?
C21 Fe C11 C12 -17.83(10) . . . . ?
C2 Fe C11 C12 -157.27(7) . . . . ?
C1 Fe C11 C12 -116.01(7) . . . . ?
C13 Fe C11 C12 38.69(7) . . . . ?
C14 Fe C11 C12 81.43(8) . . . . ?
C15 Fe C11 C12 118.06(10) . . . . ?
C3 Fe C11 C12 174.72(7) . . . . ?
C21 Fe C11 C15 -135.89(8) . . . . ?
C2 Fe C11 C15 84.67(8) . . . . ?
C1 Fe C11 C15 125.92(7) . . . . ?
C12 Fe C11 C15 -118.06(10) . . . . ?
C13 Fe C11 C15 -79.37(8) . . . . ?
C14 Fe C11 C15 -36.63(7) . . . . ?
C3 Fe C11 C15 56.66(10) . . . . ?
C21 Fe C11 C16 101.82(13) . . . . ?
C2 Fe C11 C16 -37.63(13) . . . . ?
C1 Fe C11 C16 3.63(13) . . . . ?
C12 Fe C11 C16 119.64(15) . . . . ?
C13 Fe C11 C16 158.34(13) . . . . ?
C14 Fe C11 C16 -158.92(13) . . . . ?
C15 Fe C11 C16 -122.29(15) . . . . ?
C3 Fe C11 C16 -65.64(14) . . . . ?
C15 C11 C12 C13 0.92(13) . . . . ?
C16 C11 C12 C13 174.07(12) . . . . ?
Fe C11 C12 C13 -61.51(8) . . . . ?
C15 C11 C12 C17 -166.93(12) . . . . ?
C16 C11 C12 C17 6.2(2) . . . . ?
Fe C11 C12 C17 130.65(13) . . . . ?
C15 C11 C12 Fe 62.42(8) . . . . ?
C16 C11 C12 Fe -124.42(13) . . . . ?
C21 Fe C12 C11 167.38(7) . . . . ?
C2 Fe C12 C11 35.73(11) . . . . ?
C1 Fe C12 C11 75.68(8) . . . . ?
C13 Fe C12 C11 -117.07(10) . . . . ?
C14 Fe C12 C11 -80.33(8) . . . . ?
C15 Fe C12 C11 -37.71(7) . . . . ?
C3 Fe C12 C11 -49.6(6) . . . . ?
C21 Fe C12 C13 -75.55(8) . . . . ?
C2 Fe C12 C13 152.80(8) . . . . ?
C1 Fe C12 C13 -167.25(7) . . . . ?
C11 Fe C12 C13 117.07(10) . . . . ?
C14 Fe C12 C13 36.74(7) . . . . ?
C15 Fe C12 C13 79.36(8) . . . . ?
C3 Fe C12 C13 67.5(6) . . . . ?
C21 Fe C12 C17 46.14(14) . . . . ?
C2 Fe C12 C17 -85.51(15) . . . . ?
C1 Fe C12 C17 -45.56(14) . . . . ?
C11 Fe C12 C17 -121.24(16) . . . . ?
C13 Fe C12 C17 121.69(16) . . . . ?
C14 Fe C12 C17 158.43(15) . . . . ?
C15 Fe C12 C17 -158.95(15) . . . . ?
C3 Fe C12 C17 -170.8(5) . . . . ?
C11 C12 C13 C14 0.12(13) . . . . ?
C17 C12 C13 C14 167.98(12) . . . . ?
Fe C12 C13 C14 -61.00(8) . . . . ?
C11 C12 C13 C18 -174.46(11) . . . . ?
C17 C12 C13 C18 -6.6(2) . . . . ?
Fe C12 C13 C18 124.42(12) . . . . ?
C11 C12 C13 Fe 61.12(8) . . . . ?
C17 C12 C13 Fe -131.02(13) . . . . ?
C21 Fe C13 C14 -135.63(8) . . . . ?
C2 Fe C13 C14 17.74(19) . . . . ?
C1 Fe C13 C14 144.73(10) . . . . ?
C12 Fe C13 C14 119.23(10) . . . . ?
C11 Fe C13 C14 80.77(8) . . . . ?
C15 Fe C13 C14 37.46(7) . . . . ?
C3 Fe C13 C14 -54.24(10) . . . . ?
C21 Fe C13 C12 105.14(8) . . . . ?
C2 Fe C13 C12 -101.49(17) . . . . ?
C1 Fe C13 C12 25.50(14) . . . . ?
C11 Fe C13 C12 -38.46(7) . . . . ?
C14 Fe C13 C12 -119.23(10) . . . . ?
C15 Fe C13 C12 -81.77(8) . . . . ?
C3 Fe C13 C12 -173.47(7) . . . . ?
C21 Fe C13 C18 -13.16(12) . . . . ?
C2 Fe C13 C18 140.21(16) . . . . ?
C1 Fe C13 C18 -92.81(15) . . . . ?
C12 Fe C13 C18 -118.30(15) . . . . ?
C11 Fe C13 C18 -156.76(13) . . . . ?
C14 Fe C13 C18 122.47(15) . . . . ?
C15 Fe C13 C18 159.92(13) . . . . ?
C3 Fe C13 C18 68.23(14) . . . . ?
C12 C13 C14 C15 -1.11(13) . . . . ?
C18 C13 C14 C15 173.34(12) . . . . ?
Fe C13 C14 C15 -60.63(8) . . . . ?
C12 C13 C14 C19 -174.70(12) . . . . ?
C18 C13 C14 C19 -0.2(2) . . . . ?
Fe C13 C14 C19 125.78(12) . . . . ?
C12 C13 C14 Fe 59.52(8) . . . . ?
C18 C13 C14 Fe -126.02(12) . . . . ?
C21 Fe C14 C13 49.21(8) . . . . ?
C2 Fe C14 C13 -173.69(7) . . . . ?
C1 Fe C14 C13 -133.58(13) . . . . ?
C12 Fe C14 C13 -37.71(7) . . . . ?
C11 Fe C14 C13 -81.31(8) . . . . ?
C15 Fe C14 C13 -118.36(10) . . . . ?
C3 Fe C14 C13 144.85(7) . . . . ?
C21 Fe C14 C15 167.57(7) . . . . ?
C2 Fe C14 C15 -55.32(9) . . . . ?
C1 Fe C14 C15 -15.21(16) . . . . ?
C12 Fe C14 C15 80.65(7) . . . . ?
C11 Fe C14 C15 37.05(7) . . . . ?
C13 Fe C14 C15 118.36(10) . . . . ?
C3 Fe C14 C15 -96.79(7) . . . . ?
C21 Fe C14 C19 -72.07(13) . . . . ?
C2 Fe C14 C19 65.04(14) . . . . ?
C1 Fe C14 C19 105.15(16) . . . . ?
C12 Fe C14 C19 -158.99(14) . . . . ?
C11 Fe C14 C19 157.41(14) . . . . ?
C13 Fe C14 C19 -121.27(15) . . . . ?
C15 Fe C14 C19 120.36(15) . . . . ?
C3 Fe C14 C19 23.57(13) . . . . ?
C13 C14 C15 C11 1.68(13) . . . . ?
C19 C14 C15 C11 175.38(11) . . . . ?
Fe C14 C15 C11 -58.16(8) . . . . ?
C13 C14 C15 C20 -164.21(12) . . . . ?
C19 C14 C15 C20 9.5(2) . . . . ?
Fe C14 C15 C20 135.96(12) . . . . ?
C13 C14 C15 Fe 59.83(8) . . . . ?
C19 C14 C15 Fe -126.47(12) . . . . ?
C12 C11 C15 C14 -1.62(14) . . . . ?
C16 C11 C15 C14 -174.70(12) . . . . ?
Fe C11 C15 C14 59.43(8) . . . . ?
C12 C11 C15 C20 164.26(12) . . . . ?
C16 C11 C15 C20 -8.8(2) . . . . ?
Fe C11 C15 C20 -134.70(13) . . . . ?
C12 C11 C15 Fe -61.04(8) . . . . ?
C16 C11 C15 Fe 125.87(13) . . . . ?
C21 Fe C15 C14 -23.52(13) . . . . ?
C2 Fe C15 C14 136.66(7) . . . . ?
C1 Fe C15 C14 173.52(7) . . . . ?
C12 Fe C15 C14 -81.58(8) . . . . ?
C11 Fe C15 C14 -119.67(10) . . . . ?
C13 Fe C15 C14 -37.51(7) . . . . ?
C3 Fe C15 C14 97.39(7) . . . . ?
C21 Fe C15 C11 96.15(11) . . . . ?
C2 Fe C15 C11 -103.67(8) . . . . ?
C1 Fe C15 C11 -66.81(8) . . . . ?
C12 Fe C15 C11 38.09(7) . . . . ?
C13 Fe C15 C11 82.16(8) . . . . ?
C14 Fe C15 C11 119.67(10) . . . . ?
C3 Fe C15 C11 -142.93(7) . . . . ?
C21 Fe C15 C20 -144.74(14) . . . . ?
C2 Fe C15 C20 15.44(15) . . . . ?
C1 Fe C15 C20 52.30(16) . . . . ?
C12 Fe C15 C20 157.20(16) . . . . ?
C11 Fe C15 C20 119.11(17) . . . . ?
C13 Fe C15 C20 -158.73(16) . . . . ?
C14 Fe C15 C20 -121.22(17) . . . . ?
C3 Fe C15 C20 -23.83(16) . . . . ?
C23 N2 C21 N1 0.32(13) . . . . ?
C27 N2 C21 N1 177.80(11) . . . . ?
C23 N2 C21 Fe -174.24(9) . . . . ?
C27 N2 C21 Fe 3.23(18) . . . . ?
C22 N1 C21 N2 -0.38(13) . . . . ?
C24 N1 C21 N2 175.22(11) . . . . ?
C22 N1 C21 Fe 174.08(9) . . . . ?
C24 N1 C21 Fe -10.33(17) . . . . ?
C2 Fe C21 N2 -95.20(11) . . . . ?
C1 Fe C21 N2 -130.84(11) . . . . ?
C12 Fe C21 N2 115.28(11) . . . . ?
C11 Fe C21 N2 126.65(10) . . . . ?
C13 Fe C21 N2 76.64(11) . . . . ?
C14 Fe C21 N2 48.12(12) . . . . ?
C15 Fe C21 N2 63.91(15) . . . . ?
C3 Fe C21 N2 -61.88(11) . . . . ?
C2 Fe C21 N1 91.67(11) . . . . ?
C1 Fe C21 N1 56.04(11) . . . . ?
C12 Fe C21 N1 -57.84(11) . . . . ?
C11 Fe C21 N1 -46.47(14) . . . . ?
C13 Fe C21 N1 -96.48(11) . . . . ?
C14 Fe C21 N1 -125.00(10) . . . . ?
C15 Fe C21 N1 -109.21(13) . . . . ?
C3 Fe C21 N1 125.00(11) . . . . ?
C21 N1 C22 C23 0.30(14) . . . . ?
C24 N1 C22 C23 -175.47(11) . . . . ?
C21 N1 C22 C25 178.38(12) . . . . ?
C24 N1 C22 C25 2.62(19) . . . . ?
N1 C22 C23 N2 -0.08(14) . . . . ?
C25 C22 C23 N2 -177.97(13) . . . . ?
N1 C22 C23 C26 175.90(14) . . . . ?
C25 C22 C23 C26 -2.0(3) . . . . ?
C21 N2 C23 C22 -0.16(15) . . . . ?
C27 N2 C23 C22 -177.73(11) . . . . ?
C21 N2 C23 C26 -176.56(12) . . . . ?
C27 N2 C23 C26 5.86(19) . . . . ?

_diffrn_measured_fraction_theta_max    0.998
_diffrn_reflns_theta_full              27.48
_diffrn_measured_fraction_theta_full   0.998
_refine_diff_density_max    0.315
_refine_diff_density_min   -0.273
_refine_diff_density_rms    0.044


#=============================================================================
#  end of cif data for "andyg52" (compound syn-3)
#=============================================================================

#=============================================================================
#  cif data for "andyg57" (compound 5)
#=============================================================================


data_andyg57

_audit_creation_method            SHELXL-97
_chemical_name_systematic
;
 ?
;
_chemical_name_common             ?
_chemical_melting_point           ?
_chemical_formula_moiety          ?
_chemical_formula_sum
 'C26 H42 Fe P2'
_chemical_formula_weight          472.39

loop_
 _atom_type_symbol
 _atom_type_description
 _atom_type_scat_dispersion_real
 _atom_type_scat_dispersion_imag
 _atom_type_scat_source
 'C'  'C'   0.0033   0.0016
 'International Tables Vol C Tables 4.2.6.8 and 6.1.1.4'
 'H'  'H'   0.0000   0.0000
 'International Tables Vol C Tables 4.2.6.8 and 6.1.1.4'
 'P'  'P'   0.1023   0.0942
 'International Tables Vol C Tables 4.2.6.8 and 6.1.1.4'
 'Fe'  'Fe'   0.3463   0.8444
 'International Tables Vol C Tables 4.2.6.8 and 6.1.1.4'

_symmetry_cell_setting            triclinic
_symmetry_space_group_name_H-M    'P -1'

loop_
 _symmetry_equiv_pos_as_xyz
 'x, y, z'
 '-x, -y, -z'

_cell_length_a                    9.8454(2)
_cell_length_b                    15.7886(4)
_cell_length_c                    16.6900(4)
_cell_angle_alpha                 76.568(2)
_cell_angle_beta                  85.622(2)
_cell_angle_gamma                 87.456(2)
_cell_volume                      2515.10(10)
_cell_formula_units_Z             4
_cell_measurement_temperature     100(2)
_cell_measurement_reflns_used     20038
_cell_measurement_theta_min       2.3478
_cell_measurement_theta_max       29.3017

_exptl_crystal_description        prism
_exptl_crystal_colour             red
_exptl_crystal_size_max           0.13
_exptl_crystal_size_mid           0.13
_exptl_crystal_size_min           0.07
_exptl_crystal_density_meas       ?
_exptl_crystal_density_diffrn     1.248
_exptl_crystal_density_method     'not measured'
_exptl_crystal_F_000              1016
_exptl_absorpt_coefficient_mu     0.737
_exptl_absorpt_correction_type    multi-scan
_exptl_absorpt_correction_T_min   0.95347
_exptl_absorpt_correction_T_max   1.00000
_exptl_absorpt_process_details
;
CrysAlisPro, Oxford Diffraction Ltd.,
Version 1.171.34.44 (release 25-10-2010 CrysAlis171 .NET)
(compiled Oct 25 2010,18:11:34)
;

_exptl_special_details
;
 ?
;

_diffrn_ambient_temperature       100(2)
_diffrn_radiation_wavelength      0.71073
_diffrn_radiation_type            'Mo K\a'
_diffrn_radiation_source          'Enhance (Mo) X-ray Source'
_diffrn_radiation_monochromator   graphite
_diffrn_measurement_device_type   'Oxford Diffraction Xcalibur, Eos'
_diffrn_measurement_method        '\w scans'
_diffrn_detector_area_resol_mean  16.1419
_diffrn_standards_number          ?
_diffrn_standards_interval_count  ?
_diffrn_standards_interval_time   ?
_diffrn_standards_decay_%         ?
_diffrn_reflns_number             87159
_diffrn_reflns_av_R_equivalents   0.0639
_diffrn_reflns_av_sigmaI/netI     0.0441
_diffrn_reflns_limit_h_min        -12
_diffrn_reflns_limit_h_max        12
_diffrn_reflns_limit_k_min        -20
_diffrn_reflns_limit_k_max        20
_diffrn_reflns_limit_l_min        -21
_diffrn_reflns_limit_l_max        21
_diffrn_reflns_theta_min          2.35
_diffrn_reflns_theta_max          27.10
_reflns_number_total              11098
_reflns_number_gt                 8865
_reflns_threshold_expression      >2sigma(I)

_computing_data_collection
;
CrysAlisPro, Oxford Diffraction Ltd.,
Version 1.171.34.44 (release 25-10-2010 CrysAlis171 .NET)
(compiled Oct 25 2010,18:11:34)
;
_computing_cell_refinement
;
CrysAlisPro, Oxford Diffraction Ltd.,
Version 1.171.34.44 (release 25-10-2010 CrysAlis171 .NET)
(compiled Oct 25 2010,18:11:34)
;
_computing_data_reduction
;
CrysAlisPro, Oxford Diffraction Ltd.,
Version 1.171.34.44 (release 25-10-2010 CrysAlis171 .NET)
(compiled Oct 25 2010,18:11:34)
;
_computing_structure_solution     'SHELXS-97 (Sheldrick, 1990)'
_computing_structure_refinement   'SHELXL-97 (Sheldrick, 1997)'
_computing_molecular_graphics     'BRUKER XP'
_computing_publication_material   'SHELXL-97'

_refine_special_details
;
 Refinement of F^2^ against ALL reflections.  The weighted R-factor wR and
 goodness of fit S are based on F^2^, conventional R-factors R are based
 on F, with F set to zero for negative F^2^. The threshold expression of
 F^2^ > 2sigma(F^2^) is used only for calculating R-factors(gt) etc. and is
 not relevant to the choice of reflections for refinement.  R-factors based
 on F^2^ are statistically about twice as large as those based on F, and R-
 factors based on ALL data will be even larger.

 The hydrogens of the C1, C3, C1' and C3' atoms were refined freely.
;

_refine_ls_structure_factor_coef  Fsqd
_refine_ls_matrix_type            full
_refine_ls_weighting_scheme       calc
_refine_ls_weighting_details
 'calc w=1/[\s^2^(Fo^2^)+(0.0358P)^2^+1.5178P] where P=(Fo^2^+2Fc^2^)/3'
_atom_sites_solution_primary      direct
_atom_sites_solution_secondary    difmap
_atom_sites_solution_hydrogens    geom
_refine_ls_hydrogen_treatment     mixed
_refine_ls_extinction_method      none
_refine_ls_extinction_coef        ?
_refine_ls_number_reflns          11098
_refine_ls_number_parameters      567
_refine_ls_number_restraints      0
_refine_ls_R_factor_all           0.0582
_refine_ls_R_factor_gt            0.0401
_refine_ls_wR_factor_ref          0.0885
_refine_ls_wR_factor_gt           0.0817
_refine_ls_goodness_of_fit_ref    1.026
_refine_ls_restrained_S_all       1.026
_refine_ls_shift/su_max           0.001
_refine_ls_shift/su_mean          0.000

loop_
 _atom_site_label
 _atom_site_type_symbol
 _atom_site_fract_x
 _atom_site_fract_y
 _atom_site_fract_z
 _atom_site_U_iso_or_equiv
 _atom_site_adp_type
 _atom_site_occupancy
 _atom_site_symmetry_multiplicity
 _atom_site_calc_flag
 _atom_site_refinement_flags
 _atom_site_disorder_assembly
 _atom_site_disorder_group
Fe Fe 0.56393(3) 0.90987(2) 0.251599(17) 0.01340(7) Uani 1 1 d . . .
P1 P 0.56428(6) 0.76824(4) 0.28714(3) 0.01900(13) Uani 1 1 d . . .
P2 P 0.77588(5) 0.89133(4) 0.27701(3) 0.01585(12) Uani 1 1 d . . .
C1 C 0.6291(2) 0.91824(15) 0.12354(13) 0.0175(4) Uani 1 1 d . . .
H1A H 0.716(2) 0.9302(15) 0.1165(13) 0.014(6) Uiso 1 1 d . . .
H1B H 0.582(2) 0.9682(16) 0.1012(14) 0.021(6) Uiso 1 1 d . . .
C2 C 0.5966(2) 0.84926(15) 0.08371(13) 0.0197(5) Uani 1 1 d . . .
C3 C 0.6852(2) 0.79512(16) 0.05237(13) 0.0216(5) Uani 1 1 d . . .
H3 H 0.648(2) 0.7474(16) 0.0347(14) 0.023(6) Uiso 1 1 d . . .
C4 C 0.8350(2) 0.79702(15) 0.04252(12) 0.0185(5) Uani 1 1 d . . .
C5 C 0.9048(2) 0.87472(15) 0.01539(12) 0.0198(5) Uani 1 1 d . . .
H5 H 0.8547 0.9284 0.0030 0.024 Uiso 1 1 calc R . .
C6 C 1.0459(2) 0.87477(15) 0.00620(13) 0.0230(5) Uani 1 1 d . . .
H6 H 1.0915 0.9284 -0.0111 0.028 Uiso 1 1 calc R . .
C7 C 1.1205(2) 0.79737(17) 0.02198(15) 0.0277(5) Uani 1 1 d . . .
H7 H 1.2173 0.7975 0.0161 0.033 Uiso 1 1 calc R . .
C8 C 1.0532(2) 0.71941(16) 0.04644(15) 0.0279(5) Uani 1 1 d . . .
H8 H 1.1038 0.6658 0.0563 0.033 Uiso 1 1 calc R . .
C9 C 0.9125(2) 0.71960(15) 0.05651(14) 0.0231(5) Uani 1 1 d . . .
H9 H 0.8676 0.6657 0.0734 0.028 Uiso 1 1 calc R . .
C10 C 0.4468(2) 0.84002(17) 0.07421(14) 0.0250(5) Uani 1 1 d . . .
H10A H 0.4150 0.8889 0.0314 0.038 Uiso 1 1 calc R . .
H10B H 0.3950 0.8400 0.1267 0.038 Uiso 1 1 calc R . .
H10C H 0.4333 0.7852 0.0583 0.038 Uiso 1 1 calc R . .
C11 C 0.3874(2) 0.99003(14) 0.21805(13) 0.0176(4) Uani 1 1 d . . .
C12 C 0.3616(2) 0.93252(15) 0.29621(13) 0.0196(5) Uani 1 1 d . . .
C13 C 0.4552(2) 0.94944(15) 0.35164(12) 0.0189(5) Uani 1 1 d . . .
C14 C 0.5391(2) 1.01820(14) 0.30665(13) 0.0182(5) Uani 1 1 d . . .
C15 C 0.4997(2) 1.04239(14) 0.22390(13) 0.0182(5) Uani 1 1 d . . .
C16 C 0.2990(2) 1.00601(16) 0.14614(13) 0.0250(5) Uani 1 1 d . . .
H16A H 0.2465 0.9540 0.1488 0.037 Uiso 1 1 calc R . .
H16B H 0.3565 1.0188 0.0944 0.037 Uiso 1 1 calc R . .
H16C H 0.2364 1.0556 0.1483 0.037 Uiso 1 1 calc R . .
C17 C 0.2438(2) 0.87256(17) 0.31953(15) 0.0280(5) Uani 1 1 d . . .
H17A H 0.1655 0.9034 0.3406 0.042 Uiso 1 1 calc R . .
H17B H 0.2694 0.8218 0.3624 0.042 Uiso 1 1 calc R . .
H17C H 0.2196 0.8533 0.2708 0.042 Uiso 1 1 calc R . .
C18 C 0.4499(2) 0.91413(17) 0.44359(13) 0.0259(5) Uani 1 1 d . . .
H18A H 0.5428 0.9063 0.4619 0.039 Uiso 1 1 calc R . .
H18B H 0.4050 0.8579 0.4577 0.039 Uiso 1 1 calc R . .
H18C H 0.3986 0.9552 0.4711 0.039 Uiso 1 1 calc R . .
C19 C 0.6347(2) 1.06999(16) 0.34132(14) 0.0253(5) Uani 1 1 d . . .
H19A H 0.7124 1.0872 0.3014 0.038 Uiso 1 1 calc R . .
H19B H 0.6673 1.0343 0.3928 0.038 Uiso 1 1 calc R . .
H19C H 0.5867 1.1222 0.3523 0.038 Uiso 1 1 calc R . .
C20 C 0.5556(2) 1.11699(15) 0.15907(14) 0.0249(5) Uani 1 1 d . . .
H20A H 0.5466 1.1703 0.1798 0.037 Uiso 1 1 calc R . .
H20B H 0.5049 1.1246 0.1095 0.037 Uiso 1 1 calc R . .
H20C H 0.6521 1.1050 0.1454 0.037 Uiso 1 1 calc R . .
C21 C 0.4596(3) 0.69481(16) 0.24841(16) 0.0309(6) Uani 1 1 d . . .
H21A H 0.4762 0.6346 0.2787 0.046 Uiso 1 1 calc R . .
H21B H 0.4838 0.6999 0.1895 0.046 Uiso 1 1 calc R . .
H21C H 0.3630 0.7108 0.2564 0.046 Uiso 1 1 calc R . .
C22 C 0.5302(2) 0.71783(16) 0.39789(14) 0.0282(5) Uani 1 1 d . . .
H22A H 0.4339 0.7271 0.4140 0.042 Uiso 1 1 calc R . .
H22B H 0.5872 0.7444 0.4305 0.042 Uiso 1 1 calc R . .
H22C H 0.5515 0.6552 0.4079 0.042 Uiso 1 1 calc R . .
C23 C 0.7376(2) 0.72118(15) 0.26833(15) 0.0254(5) Uani 1 1 d . . .
H23A H 0.7604 0.6756 0.3175 0.030 Uiso 1 1 calc R . .
H23B H 0.7378 0.6934 0.2209 0.030 Uiso 1 1 calc R . .
C24 C 0.8458(2) 0.79063(15) 0.25035(14) 0.0217(5) Uani 1 1 d . . .
H24A H 0.8770 0.8029 0.1911 0.026 Uiso 1 1 calc R . .
H24B H 0.9253 0.7690 0.2829 0.026 Uiso 1 1 calc R . .
C25 C 0.9021(2) 0.97094(16) 0.22360(14) 0.0256(5) Uani 1 1 d . . .
H25A H 0.9940 0.9468 0.2346 0.038 Uiso 1 1 calc R . .
H25B H 0.8883 1.0245 0.2436 0.038 Uiso 1 1 calc R . .
H25C H 0.8914 0.9840 0.1640 0.038 Uiso 1 1 calc R . .
C26 C 0.8271(2) 0.87420(17) 0.38348(13) 0.0255(5) Uani 1 1 d . . .
H26A H 0.9253 0.8611 0.3844 0.038 Uiso 1 1 calc R . .
H26B H 0.7775 0.8254 0.4189 0.038 Uiso 1 1 calc R . .
H26C H 0.8059 0.9271 0.4038 0.038 Uiso 1 1 calc R . .
Fe' Fe 0.94604(3) 0.67530(2) 0.669017(17) 0.01470(8) Uani 1 1 d . . .
P1' P 0.90939(6) 0.54333(4) 0.73889(3) 0.01812(12) Uani 1 1 d . . .
P2' P 0.92024(6) 0.70559(4) 0.78932(3) 0.01664(12) Uani 1 1 d . . .
C1' C 1.1641(2) 0.66569(15) 0.68644(14) 0.0176(4) Uani 1 1 d . . .
H1A' H 1.192(2) 0.7044(16) 0.6407(15) 0.023(6) Uiso 1 1 d . . .
H1B' H 1.178(2) 0.6896(17) 0.7307(16) 0.030(7) Uiso 1 1 d . . .
C2' C 1.2476(2) 0.58453(16) 0.69271(14) 0.0244(5) Uani 1 1 d . . .
C3' C 1.3127(2) 0.53932(17) 0.75812(16) 0.0281(5) Uani 1 1 d . . .
H3' H 1.355(3) 0.4841(18) 0.7533(15) 0.035(7) Uiso 1 1 d . . .
C4' C 1.3280(2) 0.55970(16) 0.83925(14) 0.0238(5) Uani 1 1 d . . .
C5' C 1.3569(2) 0.64258(16) 0.84858(14) 0.0241(5) Uani 1 1 d . . .
H5' H 1.3669 0.6893 0.8012 0.029 Uiso 1 1 calc R . .
C6' C 1.3711(2) 0.65750(17) 0.92604(14) 0.0269(5) Uani 1 1 d . . .
H6' H 1.3903 0.7145 0.9309 0.032 Uiso 1 1 calc R . .
C7' C 1.3579(2) 0.59116(18) 0.99638(15) 0.0321(6) Uani 1 1 d . . .
H7' H 1.3658 0.6023 1.0494 0.038 Uiso 1 1 calc R . .
C8' C 1.3330(2) 0.50810(19) 0.98797(16) 0.0351(6) Uani 1 1 d . . .
H8' H 1.3250 0.4614 1.0355 0.042 Uiso 1 1 calc R . .
C9' C 1.3198(2) 0.49299(17) 0.91052(16) 0.0302(6) Uani 1 1 d . . .
H9' H 1.3047 0.4354 0.9058 0.036 Uiso 1 1 calc R . .
C10' C 1.2644(3) 0.54960(17) 0.61503(16) 0.0326(6) Uani 1 1 d . . .
H10D H 1.3201 0.5892 0.5725 0.049 Uiso 1 1 calc R . .
H10E H 1.1746 0.5452 0.5949 0.049 Uiso 1 1 calc R . .
H10F H 1.3093 0.4919 0.6275 0.049 Uiso 1 1 calc R . .
C11' C 0.9770(2) 0.70893(15) 0.53838(12) 0.0193(5) Uani 1 1 d . . .
C12' C 0.8526(2) 0.66495(15) 0.56139(13) 0.0199(5) Uani 1 1 d . . .
C13' C 0.7647(2) 0.71498(15) 0.60679(13) 0.0207(5) Uani 1 1 d . . .
C14' C 0.8371(2) 0.78985(15) 0.61070(13) 0.0198(5) Uani 1 1 d . . .
C15' C 0.9687(2) 0.78619(14) 0.56985(13) 0.0189(5) Uani 1 1 d . . .
C16' C 1.0869(3) 0.68827(17) 0.47758(14) 0.0290(6) Uani 1 1 d . . .
H16D H 1.0895 0.6256 0.4801 0.044 Uiso 1 1 calc R . .
H16E H 1.1751 0.7054 0.4912 0.044 Uiso 1 1 calc R . .
H16F H 1.0676 0.7203 0.4217 0.044 Uiso 1 1 calc R . .
C17' C 0.8148(3) 0.58664(16) 0.53230(15) 0.0304(6) Uani 1 1 d . . .
H17D H 0.7887 0.6048 0.4752 0.046 Uiso 1 1 calc R . .
H17E H 0.7381 0.5582 0.5677 0.046 Uiso 1 1 calc R . .
H17F H 0.8930 0.5457 0.5350 0.046 Uiso 1 1 calc R . .
C18' C 0.6163(2) 0.70059(18) 0.63234(15) 0.0310(6) Uani 1 1 d . . .
H18D H 0.5956 0.7137 0.6866 0.047 Uiso 1 1 calc R . .
H18E H 0.5956 0.6397 0.6353 0.047 Uiso 1 1 calc R . .
H18F H 0.5608 0.7390 0.5917 0.047 Uiso 1 1 calc R . .
C19' C 0.7767(3) 0.86890(16) 0.63757(15) 0.0305(6) Uani 1 1 d . . .
H19D H 0.8428 0.8912 0.6680 0.046 Uiso 1 1 calc R . .
H19E H 0.6938 0.8530 0.6733 0.046 Uiso 1 1 calc R . .
H19F H 0.7543 0.9140 0.5889 0.046 Uiso 1 1 calc R . .
C20' C 1.0713(3) 0.85650(16) 0.55432(15) 0.0283(5) Uani 1 1 d . . .
H20D H 1.0496 0.9013 0.5053 0.042 Uiso 1 1 calc R . .
H20E H 1.1625 0.8315 0.5454 0.042 Uiso 1 1 calc R . .
H20F H 1.0690 0.8827 0.6022 0.042 Uiso 1 1 calc R . .
C21' C 0.9798(3) 0.44313(15) 0.71176(15) 0.0288(5) Uani 1 1 d . . .
H21D H 0.9495 0.3925 0.7545 0.043 Uiso 1 1 calc R . .
H21E H 1.0796 0.4443 0.7077 0.043 Uiso 1 1 calc R . .
H21F H 0.9479 0.4392 0.6586 0.043 Uiso 1 1 calc R . .
C22' C 0.7314(2) 0.51003(16) 0.76070(15) 0.0276(5) Uani 1 1 d . . .
H22D H 0.6918 0.5085 0.7089 0.041 Uiso 1 1 calc R . .
H22E H 0.6794 0.5518 0.7870 0.041 Uiso 1 1 calc R . .
H22F H 0.7281 0.4520 0.7978 0.041 Uiso 1 1 calc R . .
C23' C 0.9670(2) 0.52659(15) 0.84460(13) 0.0224(5) Uani 1 1 d . . .
H23C H 0.9011 0.4899 0.8841 0.027 Uiso 1 1 calc R . .
H23D H 1.0564 0.4952 0.8474 0.027 Uiso 1 1 calc R . .
C24' C 0.9798(2) 0.61329(14) 0.86988(13) 0.0211(5) Uani 1 1 d . . .
H24C H 1.0762 0.6213 0.8789 0.025 Uiso 1 1 calc R . .
H24D H 0.9251 0.6119 0.9224 0.025 Uiso 1 1 calc R . .
C25' C 1.0070(2) 0.79720(15) 0.81085(14) 0.0233(5) Uani 1 1 d . . .
H25D H 0.9684 0.8520 0.7794 0.035 Uiso 1 1 calc R . .
H25E H 1.1045 0.7930 0.7947 0.035 Uiso 1 1 calc R . .
H25F H 0.9947 0.7956 0.8700 0.035 Uiso 1 1 calc R . .
C26' C 0.7488(2) 0.72671(16) 0.83327(14) 0.0250(5) Uani 1 1 d . . .
H26D H 0.7545 0.7338 0.8897 0.038 Uiso 1 1 calc R . .
H26E H 0.6909 0.6776 0.8342 0.038 Uiso 1 1 calc R . .
H26F H 0.7096 0.7800 0.7994 0.038 Uiso 1 1 calc R . .

loop_
 _atom_site_aniso_label
 _atom_site_aniso_U_11
 _atom_site_aniso_U_22
 _atom_site_aniso_U_33
 _atom_site_aniso_U_23
 _atom_site_aniso_U_13
 _atom_site_aniso_U_12
Fe 0.01474(15) 0.01470(16) 0.01084(14) -0.00328(12) -0.00165(11) 0.00202(12)
P1 0.0204(3) 0.0157(3) 0.0203(3) -0.0031(2) -0.0009(2) -0.0002(2)
P2 0.0163(3) 0.0178(3) 0.0136(3) -0.0035(2) -0.0033(2) 0.0018(2)
C1 0.0137(11) 0.0182(12) 0.0196(11) -0.0033(9) -0.0010(9) 0.0048(9)
C2 0.0190(11) 0.0269(13) 0.0130(10) -0.0045(9) -0.0013(8) 0.0013(9)
C3 0.0252(12) 0.0233(13) 0.0189(11) -0.0098(10) -0.0024(9) -0.0023(10)
C4 0.0239(11) 0.0213(12) 0.0124(10) -0.0084(9) -0.0003(8) 0.0008(9)
C5 0.0263(12) 0.0202(12) 0.0134(10) -0.0055(9) -0.0018(9) 0.0029(9)
C6 0.0285(12) 0.0211(13) 0.0210(11) -0.0075(10) 0.0001(9) -0.0079(10)
C7 0.0183(11) 0.0366(15) 0.0310(13) -0.0128(11) -0.0029(10) -0.0012(10)
C8 0.0268(12) 0.0235(13) 0.0321(13) -0.0051(11) -0.0033(10) 0.0075(10)
C9 0.0271(12) 0.0183(12) 0.0247(12) -0.0073(10) 0.0021(10) -0.0017(10)
C10 0.0221(11) 0.0349(15) 0.0218(12) -0.0135(11) -0.0042(9) 0.0013(10)
C11 0.0167(10) 0.0200(12) 0.0158(10) -0.0046(9) -0.0015(8) 0.0067(9)
C12 0.0149(10) 0.0228(12) 0.0204(11) -0.0051(9) 0.0004(8) 0.0059(9)
C13 0.0217(11) 0.0218(12) 0.0127(10) -0.0054(9) 0.0010(8) 0.0080(9)
C14 0.0224(11) 0.0169(12) 0.0167(10) -0.0082(9) -0.0006(9) 0.0056(9)
C15 0.0220(11) 0.0172(12) 0.0149(10) -0.0046(9) 0.0013(9) 0.0060(9)
C16 0.0245(12) 0.0292(14) 0.0203(11) -0.0044(10) -0.0050(9) 0.0089(10)
C17 0.0197(11) 0.0328(15) 0.0278(13) -0.0001(11) -0.0011(10) 0.0011(10)
C18 0.0308(13) 0.0317(14) 0.0138(11) -0.0044(10) 0.0009(9) 0.0046(11)
C19 0.0304(13) 0.0258(14) 0.0231(12) -0.0127(10) -0.0008(10) -0.0001(10)
C20 0.0320(13) 0.0191(13) 0.0220(12) -0.0029(10) 0.0011(10) 0.0027(10)
C21 0.0329(14) 0.0203(13) 0.0410(15) -0.0090(11) -0.0041(11) -0.0043(11)
C22 0.0297(13) 0.0225(13) 0.0272(13) 0.0031(10) 0.0036(10) 0.0014(10)
C23 0.0279(12) 0.0178(12) 0.0284(12) -0.0031(10) 0.0000(10) 0.0067(10)
C24 0.0209(11) 0.0240(13) 0.0209(11) -0.0071(10) -0.0042(9) 0.0073(9)
C25 0.0210(11) 0.0275(14) 0.0277(12) -0.0037(10) -0.0035(10) -0.0040(10)
C26 0.0228(12) 0.0357(15) 0.0188(11) -0.0075(10) -0.0061(9) 0.0040(10)
Fe' 0.01852(15) 0.01299(16) 0.01299(15) -0.00412(12) -0.00075(12) 0.00079(12)
P1' 0.0225(3) 0.0140(3) 0.0184(3) -0.0043(2) -0.0019(2) -0.0014(2)
P2' 0.0203(3) 0.0155(3) 0.0147(3) -0.0053(2) 0.0004(2) -0.0003(2)
C1' 0.0184(11) 0.0183(12) 0.0164(11) -0.0046(10) 0.0000(9) -0.0007(9)
C2' 0.0201(11) 0.0246(13) 0.0303(13) -0.0107(11) 0.0012(10) -0.0021(10)
C3' 0.0247(12) 0.0195(13) 0.0418(15) -0.0106(11) -0.0048(11) 0.0034(10)
C4' 0.0159(11) 0.0223(13) 0.0308(13) -0.0009(10) -0.0035(9) 0.0014(9)
C5' 0.0211(11) 0.0233(13) 0.0252(12) -0.0008(10) -0.0017(9) 0.0035(10)
C6' 0.0253(12) 0.0304(14) 0.0249(12) -0.0068(11) -0.0013(10) 0.0026(10)
C7' 0.0273(13) 0.0396(17) 0.0250(13) -0.0004(11) -0.0002(10) 0.0045(12)
C8' 0.0230(12) 0.0399(17) 0.0322(14) 0.0128(12) -0.0034(11) -0.0017(11)
C9' 0.0221(12) 0.0206(13) 0.0436(15) 0.0036(11) -0.0089(11) -0.0007(10)
C10' 0.0320(14) 0.0307(15) 0.0394(15) -0.0181(12) -0.0043(11) 0.0097(11)
C11' 0.0271(12) 0.0180(12) 0.0121(10) -0.0023(9) -0.0016(9) 0.0015(9)
C12' 0.0267(12) 0.0195(12) 0.0141(10) -0.0044(9) -0.0055(9) 0.0013(9)
C13' 0.0219(11) 0.0229(13) 0.0166(11) -0.0023(9) -0.0056(9) 0.0039(9)
C14' 0.0268(12) 0.0182(12) 0.0136(10) -0.0024(9) -0.0051(9) 0.0084(9)
C15' 0.0249(11) 0.0149(11) 0.0148(10) 0.0008(9) -0.0032(9) 0.0011(9)
C16' 0.0354(14) 0.0321(15) 0.0177(11) -0.0048(10) 0.0042(10) 0.0048(11)
C17' 0.0442(15) 0.0269(14) 0.0233(12) -0.0092(11) -0.0103(11) -0.0036(12)
C18' 0.0230(12) 0.0413(16) 0.0262(13) -0.0027(11) -0.0033(10) 0.0021(11)
C19' 0.0409(15) 0.0232(14) 0.0269(13) -0.0067(11) -0.0050(11) 0.0155(11)
C20' 0.0373(14) 0.0204(13) 0.0260(12) -0.0015(10) -0.0043(11) -0.0056(11)
C21' 0.0406(14) 0.0154(12) 0.0319(13) -0.0086(10) -0.0026(11) 0.0009(11)
C22' 0.0279(12) 0.0225(13) 0.0308(13) -0.0001(10) -0.0053(10) -0.0092(10)
C23' 0.0272(12) 0.0178(12) 0.0202(11) 0.0005(9) -0.0023(9) -0.0011(10)
C24' 0.0276(12) 0.0190(12) 0.0156(11) -0.0020(9) -0.0013(9) -0.0011(10)
C25' 0.0310(13) 0.0188(12) 0.0219(11) -0.0086(10) -0.0005(10) -0.0014(10)
C26' 0.0240(12) 0.0304(14) 0.0218(12) -0.0104(10) 0.0028(9) 0.0043(10)

_geom_special_details
;
 All esds (except the esd in the dihedral angle between two l.s. planes)
 are estimated using the full covariance matrix.  The cell esds are taken
 into account individually in the estimation of esds in distances, angles
 and torsion angles; correlations between esds in cell parameters are only
 used when they are defined by crystal symmetry.  An approximate (isotropic)
 treatment of cell esds is used for estimating esds involving l.s. planes.
;

loop_
 _geom_bond_atom_site_label_1
 _geom_bond_atom_site_label_2
 _geom_bond_distance
 _geom_bond_site_symmetry_2
 _geom_bond_publ_flag
Fe C15 2.114(2) . ?
Fe C13 2.116(2) . ?
Fe C12 2.118(2) . ?
Fe C14 2.119(2) . ?
Fe C11 2.135(2) . ?
Fe P2 2.1548(6) . ?
Fe C1 2.160(2) . ?
Fe P1 2.1761(7) . ?
P1 C21 1.838(2) . ?
P1 C22 1.846(2) . ?
P1 C23 1.865(2) . ?
P2 C25 1.835(2) . ?
P2 C24 1.840(2) . ?
P2 C26 1.840(2) . ?
C1 C2 1.460(3) . ?
C2 C3 1.355(3) . ?
C2 C10 1.512(3) . ?
C3 C4 1.473(3) . ?
C4 C9 1.394(3) . ?
C4 C5 1.397(3) . ?
C5 C6 1.386(3) . ?
C6 C7 1.379(3) . ?
C7 C8 1.385(3) . ?
C8 C9 1.383(3) . ?
C11 C12 1.418(3) . ?
C11 C15 1.432(3) . ?
C11 C16 1.504(3) . ?
C12 C13 1.429(3) . ?
C12 C17 1.500(3) . ?
C13 C14 1.425(3) . ?
C13 C18 1.504(3) . ?
C14 C15 1.424(3) . ?
C14 C19 1.504(3) . ?
C15 C20 1.495(3) . ?
C23 C24 1.526(3) . ?
Fe' C15' 2.118(2) . ?
Fe' C12' 2.122(2) . ?
Fe' C11' 2.122(2) . ?
Fe' C13' 2.131(2) . ?
Fe' C14' 2.131(2) . ?
Fe' P2' 2.1638(6) . ?
Fe' P1' 2.1692(7) . ?
Fe' C1' 2.182(2) . ?
P1' C22' 1.837(2) . ?
P1' C21' 1.837(2) . ?
P1' C23' 1.851(2) . ?
P2' C25' 1.830(2) . ?
P2' C26' 1.837(2) . ?
P2' C24' 1.846(2) . ?
C1' C2' 1.479(3) . ?
C2' C3' 1.348(3) . ?
C2' C10' 1.518(3) . ?
C3' C4' 1.482(3) . ?
C4' C9' 1.393(3) . ?
C4' C5' 1.397(3) . ?
C5' C6' 1.385(3) . ?
C6' C7' 1.382(3) . ?
C7' C8' 1.385(4) . ?
C8' C9' 1.384(4) . ?
C11' C12' 1.418(3) . ?
C11' C15' 1.433(3) . ?
C11' C16' 1.504(3) . ?
C12' C13' 1.437(3) . ?
C12' C17' 1.500(3) . ?
C13' C14' 1.423(3) . ?
C13' C18' 1.503(3) . ?
C14' C15' 1.423(3) . ?
C14' C19' 1.505(3) . ?
C15' C20' 1.499(3) . ?
C23' C24' 1.536(3) . ?

loop_
 _geom_angle_atom_site_label_1
 _geom_angle_atom_site_label_2
 _geom_angle_atom_site_label_3
 _geom_angle
 _geom_angle_site_symmetry_1
 _geom_angle_site_symmetry_3
 _geom_angle_publ_flag
C15 Fe C13 66.32(8) . . ?
C15 Fe C12 65.93(9) . . ?
C13 Fe C12 39.47(8) . . ?
C15 Fe C14 39.31(8) . . ?
C13 Fe C14 39.33(8) . . ?
C12 Fe C14 65.69(9) . . ?
C15 Fe C11 39.38(8) . . ?
C13 Fe C11 65.94(8) . . ?
C12 Fe C11 38.95(8) . . ?
C14 Fe C11 65.63(8) . . ?
C15 Fe P2 113.03(6) . . ?
C13 Fe P2 108.64(6) . . ?
C12 Fe P2 147.49(6) . . ?
C14 Fe P2 92.71(6) . . ?
C11 Fe P2 152.39(6) . . ?
C15 Fe C1 90.72(8) . . ?
C13 Fe C1 155.68(9) . . ?
C12 Fe C1 124.91(8) . . ?
C14 Fe C1 124.38(9) . . ?
C11 Fe C1 91.43(8) . . ?
P2 Fe C1 87.09(6) . . ?
C15 Fe P1 162.71(6) . . ?
C13 Fe P1 104.25(6) . . ?
C12 Fe P1 97.41(7) . . ?
C14 Fe P1 139.55(6) . . ?
C11 Fe P1 124.16(6) . . ?
P2 Fe P1 83.39(2) . . ?
C1 Fe P1 95.71(6) . . ?
C21 P1 C22 96.43(12) . . ?
C21 P1 C23 100.28(11) . . ?
C22 P1 C23 100.42(11) . . ?
C21 P1 Fe 127.53(9) . . ?
C22 P1 Fe 116.99(9) . . ?
C23 P1 Fe 110.92(8) . . ?
C25 P2 C24 101.71(11) . . ?
C25 P2 C26 99.80(11) . . ?
C24 P2 C26 100.37(11) . . ?
C25 P2 Fe 120.88(8) . . ?
C24 P2 Fe 110.41(7) . . ?
C26 P2 Fe 120.39(8) . . ?
C2 C1 Fe 120.04(16) . . ?
C3 C2 C1 127.4(2) . . ?
C3 C2 C10 117.0(2) . . ?
C1 C2 C10 115.55(19) . . ?
C2 C3 C4 128.8(2) . . ?
C9 C4 C5 117.4(2) . . ?
C9 C4 C3 120.3(2) . . ?
C5 C4 C3 122.2(2) . . ?
C6 C5 C4 121.1(2) . . ?
C7 C6 C5 120.4(2) . . ?
C6 C7 C8 119.5(2) . . ?
C9 C8 C7 120.0(2) . . ?
C8 C9 C4 121.6(2) . . ?
C12 C11 C15 107.80(18) . . ?
C12 C11 C16 126.7(2) . . ?
C15 C11 C16 124.6(2) . . ?
C12 C11 Fe 69.87(12) . . ?
C15 C11 Fe 69.52(12) . . ?
C16 C11 Fe 134.40(15) . . ?
C11 C12 C13 108.68(19) . . ?
C11 C12 C17 125.3(2) . . ?
C13 C12 C17 125.6(2) . . ?
C11 C12 Fe 71.18(12) . . ?
C13 C12 Fe 70.19(12) . . ?
C17 C12 Fe 130.67(16) . . ?
C14 C13 C12 107.21(18) . . ?
C14 C13 C18 125.3(2) . . ?
C12 C13 C18 126.5(2) . . ?
C14 C13 Fe 70.43(11) . . ?
C12 C13 Fe 70.34(12) . . ?
C18 C13 Fe 132.98(16) . . ?
C15 C14 C13 108.62(19) . . ?
C15 C14 C19 123.3(2) . . ?
C13 C14 C19 127.07(19) . . ?
C15 C14 Fe 70.17(12) . . ?
C13 C14 Fe 70.23(12) . . ?
C19 C14 Fe 134.23(15) . . ?
C14 C15 C11 107.66(19) . . ?
C14 C15 C20 125.0(2) . . ?
C11 C15 C20 126.93(19) . . ?
C14 C15 Fe 70.51(12) . . ?
C11 C15 Fe 71.10(12) . . ?
C20 C15 Fe 129.61(15) . . ?
C24 C23 P1 111.71(16) . . ?
C23 C24 P2 110.27(15) . . ?
C15' Fe' C12' 66.01(8) . . ?
C15' Fe' C11' 39.49(8) . . ?
C12' Fe' C11' 39.03(8) . . ?
C15' Fe' C13' 66.07(9) . . ?
C12' Fe' C13' 39.49(8) . . ?
C11' Fe' C13' 65.89(8) . . ?
C15' Fe' C14' 39.12(8) . . ?
C12' Fe' C14' 65.54(8) . . ?
C11' Fe' C14' 65.50(8) . . ?
C13' Fe' C14' 39.03(9) . . ?
C15' Fe' P2' 113.92(6) . . ?
C12' Fe' P2' 147.00(6) . . ?
C11' Fe' P2' 153.41(6) . . ?
C13' Fe' P2' 108.38(6) . . ?
C14' Fe' P2' 93.36(6) . . ?
C15' Fe' P1' 161.87(6) . . ?
C12' Fe' P1' 96.76(6) . . ?
C11' Fe' P1' 123.04(6) . . ?
C13' Fe' P1' 104.74(7) . . ?
C14' Fe' P1' 140.26(7) . . ?
P2' Fe' P1' 83.49(2) . . ?
C15' Fe' C1' 92.39(9) . . ?
C12' Fe' C1' 126.36(9) . . ?
C11' Fe' C1' 93.09(9) . . ?
C13' Fe' C1' 157.28(9) . . ?
C14' Fe' C1' 125.62(9) . . ?
P2' Fe' C1' 86.38(6) . . ?
P1' Fe' C1' 93.81(6) . . ?
C22' P1' C21' 97.48(12) . . ?
C22' P1' C23' 101.24(11) . . ?
C21' P1' C23' 99.86(11) . . ?
C22' P1' Fe' 117.47(8) . . ?
C21' P1' Fe' 126.02(9) . . ?
C23' P1' Fe' 110.89(8) . . ?
C25' P2' C26' 98.83(11) . . ?
C25' P2' C24' 102.08(11) . . ?
C26' P2' C24' 101.16(11) . . ?
C25' P2' Fe' 120.95(8) . . ?
C26' P2' Fe' 119.98(8) . . ?
C24' P2' Fe' 110.76(7) . . ?
C2' C1' Fe' 124.06(16) . . ?
C3' C2' C1' 127.9(2) . . ?
C3' C2' C10' 116.4(2) . . ?
C1' C2' C10' 115.6(2) . . ?
C2' C3' C4' 130.0(2) . . ?
C9' C4' C5' 117.0(2) . . ?
C9' C4' C3' 119.4(2) . . ?
C5' C4' C3' 123.5(2) . . ?
C6' C5' C4' 120.8(2) . . ?
C7' C6' C5' 121.3(2) . . ?
C6' C7' C8' 118.6(2) . . ?
C9' C8' C7' 120.2(2) . . ?
C8' C9' C4' 122.0(2) . . ?
C12' C11' C15' 108.25(19) . . ?
C12' C11' C16' 125.7(2) . . ?
C15' C11' C16' 125.1(2) . . ?
C12' C11' Fe' 70.47(12) . . ?
C15' C11' Fe' 70.10(12) . . ?
C16' C11' Fe' 134.24(16) . . ?
C11' C12' C13' 108.2(2) . . ?
C11' C12' C17' 124.6(2) . . ?
C13' C12' C17' 126.6(2) . . ?
C11' C12' Fe' 70.50(12) . . ?
C13' C12' Fe' 70.58(12) . . ?
C17' C12' Fe' 131.02(16) . . ?
C14' C13' C12' 107.18(19) . . ?
C14' C13' C18' 125.3(2) . . ?
C12' C13' C18' 126.7(2) . . ?
C14' C13' Fe' 70.49(12) . . ?
C12' C13' Fe' 69.93(12) . . ?
C18' C13' Fe' 132.81(16) . . ?
C15' C14' C13' 108.94(19) . . ?
C15' C14' C19' 124.2(2) . . ?
C13' C14' C19' 125.8(2) . . ?
C15' C14' Fe' 69.97(12) . . ?
C13' C14' Fe' 70.48(12) . . ?
C19' C14' Fe' 134.93(15) . . ?
C14' C15' C11' 107.38(19) . . ?
C14' C15' C20' 125.3(2) . . ?
C11' C15' C20' 126.9(2) . . ?
C14' C15' Fe' 70.91(12) . . ?
C11' C15' Fe' 70.41(12) . . ?
C20' C15' Fe' 129.57(15) . . ?
C24' C23' P1' 111.83(15) . . ?
C23' C24' P2' 110.85(15) . . ?

loop_
 _geom_torsion_atom_site_label_1
 _geom_torsion_atom_site_label_2
 _geom_torsion_atom_site_label_3
 _geom_torsion_atom_site_label_4
 _geom_torsion
 _geom_torsion_site_symmetry_1
 _geom_torsion_site_symmetry_2
 _geom_torsion_site_symmetry_3
 _geom_torsion_site_symmetry_4
 _geom_torsion_publ_flag
C15 Fe P1 C21 49.1(2) . . . . ?
C13 Fe P1 C21 103.79(12) . . . . ?
C12 Fe P1 C21 64.16(12) . . . . ?
C14 Fe P1 C21 125.00(14) . . . . ?
C11 Fe P1 C21 33.42(13) . . . . ?
P2 Fe P1 C21 -148.60(11) . . . . ?
C1 Fe P1 C21 -62.21(12) . . . . ?
C15 Fe P1 C22 -74.2(2) . . . . ?
C13 Fe P1 C22 -19.56(11) . . . . ?
C12 Fe P1 C22 -59.19(11) . . . . ?
C14 Fe P1 C22 1.65(13) . . . . ?
C11 Fe P1 C22 -89.92(11) . . . . ?
P2 Fe P1 C22 88.06(9) . . . . ?
C1 Fe P1 C22 174.44(11) . . . . ?
C15 Fe P1 C23 171.5(2) . . . . ?
C13 Fe P1 C23 -133.89(10) . . . . ?
C12 Fe P1 C23 -173.52(10) . . . . ?
C14 Fe P1 C23 -112.68(12) . . . . ?
C11 Fe P1 C23 155.74(11) . . . . ?
P2 Fe P1 C23 -26.28(9) . . . . ?
C1 Fe P1 C23 60.11(10) . . . . ?
C15 Fe P2 C25 -33.78(11) . . . . ?
C13 Fe P2 C25 -105.28(11) . . . . ?
C12 Fe P2 C25 -114.70(15) . . . . ?
C14 Fe P2 C25 -68.54(11) . . . . ?
C11 Fe P2 C25 -31.74(16) . . . . ?
C1 Fe P2 C25 55.77(11) . . . . ?
P1 Fe P2 C25 151.87(9) . . . . ?
C15 Fe P2 C24 -152.12(10) . . . . ?
C13 Fe P2 C24 136.37(10) . . . . ?
C12 Fe P2 C24 126.95(14) . . . . ?
C14 Fe P2 C24 173.12(10) . . . . ?
C11 Fe P2 C24 -150.09(14) . . . . ?
C1 Fe P2 C24 -62.58(10) . . . . ?
P1 Fe P2 C24 33.52(8) . . . . ?
C15 Fe P2 C26 91.72(12) . . . . ?
C13 Fe P2 C26 20.21(12) . . . . ?
C12 Fe P2 C26 10.79(16) . . . . ?
C14 Fe P2 C26 56.96(12) . . . . ?
C11 Fe P2 C26 93.75(16) . . . . ?
C1 Fe P2 C26 -178.74(12) . . . . ?
P1 Fe P2 C26 -82.64(10) . . . . ?
C15 Fe C1 C2 -135.69(18) . . . . ?
C13 Fe C1 C2 -117.1(2) . . . . ?
C12 Fe C1 C2 -74.9(2) . . . . ?
C14 Fe C1 C2 -157.42(16) . . . . ?
C11 Fe C1 C2 -96.31(18) . . . . ?
P2 Fe C1 C2 111.29(17) . . . . ?
P1 Fe C1 C2 28.24(18) . . . . ?
Fe C1 C2 C3 -116.4(2) . . . . ?
Fe C1 C2 C10 65.8(2) . . . . ?
C1 C2 C3 C4 -6.8(4) . . . . ?
C10 C2 C3 C4 170.9(2) . . . . ?
C2 C3 C4 C9 142.0(2) . . . . ?
C2 C3 C4 C5 -41.1(3) . . . . ?
C9 C4 C5 C6 -2.7(3) . . . . ?
C3 C4 C5 C6 -179.66(19) . . . . ?
C4 C5 C6 C7 1.5(3) . . . . ?
C5 C6 C7 C8 0.5(3) . . . . ?
C6 C7 C8 C9 -1.3(4) . . . . ?
C7 C8 C9 C4 0.1(3) . . . . ?
C5 C4 C9 C8 1.9(3) . . . . ?
C3 C4 C9 C8 179.0(2) . . . . ?
C15 Fe C11 C12 -118.98(18) . . . . ?
C13 Fe C11 C12 -37.57(13) . . . . ?
C14 Fe C11 C12 -80.88(14) . . . . ?
P2 Fe C11 C12 -121.93(14) . . . . ?
C1 Fe C11 C12 151.62(14) . . . . ?
P1 Fe C11 C12 53.73(14) . . . . ?
C13 Fe C11 C15 81.41(13) . . . . ?
C12 Fe C11 C15 118.98(18) . . . . ?
C14 Fe C11 C15 38.10(12) . . . . ?
P2 Fe C11 C15 -2.95(19) . . . . ?
C1 Fe C11 C15 -89.40(13) . . . . ?
P1 Fe C11 C15 172.71(9) . . . . ?
C15 Fe C11 C16 118.9(3) . . . . ?
C13 Fe C11 C16 -159.7(3) . . . . ?
C12 Fe C11 C16 -122.1(3) . . . . ?
C14 Fe C11 C16 157.0(3) . . . . ?
P2 Fe C11 C16 115.9(2) . . . . ?
C1 Fe C11 C16 29.5(2) . . . . ?
P1 Fe C11 C16 -68.4(2) . . . . ?
C15 C11 C12 C13 1.1(2) . . . . ?
C16 C11 C12 C13 -168.5(2) . . . . ?
Fe C11 C12 C13 60.46(15) . . . . ?
C15 C11 C12 C17 173.6(2) . . . . ?
C16 C11 C12 C17 4.0(4) . . . . ?
Fe C11 C12 C17 -127.0(2) . . . . ?
C15 C11 C12 Fe -59.39(14) . . . . ?
C16 C11 C12 Fe 131.0(2) . . . . ?
C15 Fe C12 C11 37.44(13) . . . . ?
C13 Fe C12 C11 118.84(19) . . . . ?
C14 Fe C12 C11 80.71(14) . . . . ?
P2 Fe C12 C11 132.96(12) . . . . ?
C1 Fe C12 C11 -35.41(17) . . . . ?
P1 Fe C12 C11 -137.72(12) . . . . ?
C15 Fe C12 C13 -81.40(14) . . . . ?
C14 Fe C12 C13 -38.13(13) . . . . ?
C11 Fe C12 C13 -118.84(19) . . . . ?
P2 Fe C12 C13 14.1(2) . . . . ?
C1 Fe C12 C13 -154.25(13) . . . . ?
P1 Fe C12 C13 103.44(12) . . . . ?
C15 Fe C12 C17 158.2(2) . . . . ?
C13 Fe C12 C17 -120.4(3) . . . . ?
C14 Fe C12 C17 -158.5(2) . . . . ?
C11 Fe C12 C17 120.8(3) . . . . ?
P2 Fe C12 C17 -106.3(2) . . . . ?
C1 Fe C12 C17 85.3(2) . . . . ?
P1 Fe C12 C17 -17.0(2) . . . . ?
C11 C12 C13 C14 0.0(2) . . . . ?
C17 C12 C13 C14 -172.4(2) . . . . ?
Fe C12 C13 C14 61.12(14) . . . . ?
C11 C12 C13 C18 169.4(2) . . . . ?
C17 C12 C13 C18 -3.1(4) . . . . ?
Fe C12 C13 C18 -129.5(2) . . . . ?
C11 C12 C13 Fe -61.08(15) . . . . ?
C17 C12 C13 Fe 126.4(2) . . . . ?
C15 Fe C13 C14 -37.08(12) . . . . ?
C12 Fe C13 C14 -117.41(18) . . . . ?
C11 Fe C13 C14 -80.32(13) . . . . ?
P2 Fe C13 C14 70.54(12) . . . . ?
C1 Fe C13 C14 -57.5(3) . . . . ?
P1 Fe C13 C14 158.27(11) . . . . ?
C15 Fe C13 C12 80.33(14) . . . . ?
C14 Fe C13 C12 117.41(18) . . . . ?
C11 Fe C13 C12 37.09(13) . . . . ?
P2 Fe C13 C12 -172.04(11) . . . . ?
C1 Fe C13 C12 59.9(3) . . . . ?
P1 Fe C13 C12 -84.32(13) . . . . ?
C15 Fe C13 C18 -157.6(3) . . . . ?
C12 Fe C13 C18 122.1(3) . . . . ?
C14 Fe C13 C18 -120.5(3) . . . . ?
C11 Fe C13 C18 159.2(3) . . . . ?
P2 Fe C13 C18 -50.0(2) . . . . ?
C1 Fe C13 C18 -178.0(2) . . . . ?
P1 Fe C13 C18 37.8(2) . . . . ?
C12 C13 C14 C15 -1.2(2) . . . . ?
C18 C13 C14 C15 -170.7(2) . . . . ?
Fe C13 C14 C15 59.91(14) . . . . ?
C12 C13 C14 C19 167.8(2) . . . . ?
C18 C13 C14 C19 -1.7(3) . . . . ?
Fe C13 C14 C19 -131.1(2) . . . . ?
C12 C13 C14 Fe -61.06(14) . . . . ?
C18 C13 C14 Fe 129.4(2) . . . . ?
C13 Fe C14 C15 -119.35(18) . . . . ?
C12 Fe C14 C15 -81.10(13) . . . . ?
C11 Fe C14 C15 -38.17(12) . . . . ?
P2 Fe C14 C15 124.08(12) . . . . ?
C1 Fe C14 C15 35.76(16) . . . . ?
P1 Fe C14 C15 -152.94(10) . . . . ?
C15 Fe C14 C13 119.35(18) . . . . ?
C12 Fe C14 C13 38.25(12) . . . . ?
C11 Fe C14 C13 81.18(13) . . . . ?
P2 Fe C14 C13 -116.57(12) . . . . ?
C1 Fe C14 C13 155.11(12) . . . . ?
P1 Fe C14 C13 -33.59(16) . . . . ?
C15 Fe C14 C19 -117.7(3) . . . . ?
C13 Fe C14 C19 123.0(3) . . . . ?
C12 Fe C14 C19 161.2(2) . . . . ?
C11 Fe C14 C19 -155.9(2) . . . . ?
P2 Fe C14 C19 6.4(2) . . . . ?
C1 Fe C14 C19 -81.9(2) . . . . ?
P1 Fe C14 C19 89.4(2) . . . . ?
C13 C14 C15 C11 1.8(2) . . . . ?
C19 C14 C15 C11 -167.67(19) . . . . ?
Fe C14 C15 C11 61.76(14) . . . . ?
C13 C14 C15 C20 174.8(2) . . . . ?
C19 C14 C15 C20 5.3(3) . . . . ?
Fe C14 C15 C20 -125.3(2) . . . . ?
C13 C14 C15 Fe -59.95(15) . . . . ?
C19 C14 C15 Fe 130.6(2) . . . . ?
C12 C11 C15 C14 -1.8(2) . . . . ?
C16 C11 C15 C14 168.11(19) . . . . ?
Fe C11 C15 C14 -61.38(14) . . . . ?
C12 C11 C15 C20 -174.5(2) . . . . ?
C16 C11 C15 C20 -4.7(3) . . . . ?
Fe C11 C15 C20 125.9(2) . . . . ?
C12 C11 C15 Fe 59.61(15) . . . . ?
C16 C11 C15 Fe -130.5(2) . . . . ?
C13 Fe C15 C14 37.10(12) . . . . ?
C12 Fe C15 C14 80.44(13) . . . . ?
C11 Fe C15 C14 117.47(17) . . . . ?
P2 Fe C15 C14 -64.02(13) . . . . ?
C1 Fe C15 C14 -151.16(13) . . . . ?
P1 Fe C15 C14 96.8(2) . . . . ?
C13 Fe C15 C11 -80.37(13) . . . . ?
C12 Fe C15 C11 -37.03(12) . . . . ?
C14 Fe C15 C11 -117.47(17) . . . . ?
P2 Fe C15 C11 178.51(10) . . . . ?
C1 Fe C15 C11 91.37(12) . . . . ?
P1 Fe C15 C11 -20.7(3) . . . . ?
C13 Fe C15 C20 156.9(2) . . . . ?
C12 Fe C15 C20 -159.8(2) . . . . ?
C14 Fe C15 C20 119.8(3) . . . . ?
C11 Fe C15 C20 -122.8(2) . . . . ?
P2 Fe C15 C20 55.8(2) . . . . ?
C1 Fe C15 C20 -31.4(2) . . . . ?
P1 Fe C15 C20 -143.44(17) . . . . ?
C21 P1 C23 C24 149.39(17) . . . . ?
C22 P1 C23 C24 -112.03(17) . . . . ?
Fe P1 C23 C24 12.33(18) . . . . ?
P1 C23 C24 P2 13.2(2) . . . . ?
C25 P2 C24 C23 -164.31(16) . . . . ?
C26 P2 C24 C23 93.29(17) . . . . ?
Fe P2 C24 C23 -34.79(17) . . . . ?
C15' Fe' P1' C22' -77.7(2) . . . . ?
C12' Fe' P1' C22' -60.12(11) . . . . ?
C11' Fe' P1' C22' -91.25(12) . . . . ?
C13' Fe' P1' C22' -20.69(11) . . . . ?
C14' Fe' P1' C22' -0.76(13) . . . . ?
P2' Fe' P1' C22' 86.65(9) . . . . ?
C1' Fe' P1' C22' 172.56(11) . . . . ?
C15' Fe' P1' C21' 46.3(2) . . . . ?
C12' Fe' P1' C21' 63.90(12) . . . . ?
C11' Fe' P1' C21' 32.77(13) . . . . ?
C13' Fe' P1' C21' 103.33(12) . . . . ?
C14' Fe' P1' C21' 123.26(14) . . . . ?
P2' Fe' P1' C21' -149.32(11) . . . . ?
C1' Fe' P1' C21' -63.42(12) . . . . ?
C15' Fe' P1' C23' 166.6(2) . . . . ?
C12' Fe' P1' C23' -175.82(10) . . . . ?
C11' Fe' P1' C23' 153.05(11) . . . . ?
C13' Fe' P1' C23' -136.39(10) . . . . ?
C14' Fe' P1' C23' -116.46(12) . . . . ?
P2' Fe' P1' C23' -29.05(8) . . . . ?
C1' Fe' P1' C23' 56.86(10) . . . . ?
C15' Fe' P2' C25' -34.48(11) . . . . ?
C12' Fe' P2' C25' -116.81(15) . . . . ?
C11' Fe' P2' C25' -33.13(17) . . . . ?
C13' Fe' P2' C25' -105.80(11) . . . . ?
C14' Fe' P2' C25' -68.98(11) . . . . ?
P1' Fe' P2' C25' 150.79(9) . . . . ?
C1' Fe' P2' C25' 56.54(11) . . . . ?
C15' Fe' P2' C26' 89.07(12) . . . . ?
C12' Fe' P2' C26' 6.74(16) . . . . ?
C11' Fe' P2' C26' 90.42(17) . . . . ?
C13' Fe' P2' C26' 17.74(12) . . . . ?
C14' Fe' P2' C26' 54.57(12) . . . . ?
P1' Fe' P2' C26' -85.66(10) . . . . ?
C1' Fe' P2' C26' -179.92(12) . . . . ?
C15' Fe' P2' C24' -153.70(10) . . . . ?
C12' Fe' P2' C24' 123.97(14) . . . . ?
C11' Fe' P2' C24' -152.35(16) . . . . ?
C13' Fe' P2' C24' 134.97(10) . . . . ?
C14' Fe' P2' C24' 171.80(10) . . . . ?
P1' Fe' P2' C24' 31.57(8) . . . . ?
C1' Fe' P2' C24' -62.69(10) . . . . ?
C15' Fe' C1' C2' -130.28(19) . . . . ?
C12' Fe' C1' C2' -68.6(2) . . . . ?
C11' Fe' C1' C2' -90.74(19) . . . . ?
C13' Fe' C1' C2' -112.3(3) . . . . ?
C14' Fe' C1' C2' -152.57(17) . . . . ?
P2' Fe' C1' C2' 115.89(19) . . . . ?
P1' Fe' C1' C2' 32.68(19) . . . . ?
Fe' C1' C2' C3' -115.4(3) . . . . ?
Fe' C1' C2' C10' 66.3(3) . . . . ?
C1' C2' C3' C4' -4.6(4) . . . . ?
C10' C2' C3' C4' 173.6(2) . . . . ?
C2' C3' C4' C9' 140.4(3) . . . . ?
C2' C3' C4' C5' -42.7(4) . . . . ?
C9' C4' C5' C6' -2.5(3) . . . . ?
C3' C4' C5' C6' -179.5(2) . . . . ?
C4' C5' C6' C7' 0.3(3) . . . . ?
C5' C6' C7' C8' 1.5(4) . . . . ?
C6' C7' C8' C9' -1.0(4) . . . . ?
C7' C8' C9' C4' -1.3(4) . . . . ?
C5' C4' C9' C8' 3.0(3) . . . . ?
C3' C4' C9' C8' -179.9(2) . . . . ?
C15' Fe' C11' C12' -118.80(18) . . . . ?
C13' Fe' C11' C12' -37.76(13) . . . . ?
C14' Fe' C11' C12' -80.76(14) . . . . ?
P2' Fe' C11' C12' -120.74(15) . . . . ?
P1' Fe' C11' C12' 54.61(14) . . . . ?
C1' Fe' C11' C12' 151.19(14) . . . . ?
C12' Fe' C11' C15' 118.80(18) . . . . ?
C13' Fe' C11' C15' 81.04(14) . . . . ?
C14' Fe' C11' C15' 38.04(13) . . . . ?
P2' Fe' C11' C15' -1.9(2) . . . . ?
P1' Fe' C11' C15' 173.41(10) . . . . ?
C1' Fe' C11' C15' -90.02(13) . . . . ?
C15' Fe' C11' C16' 120.0(3) . . . . ?
C12' Fe' C11' C16' -121.2(3) . . . . ?
C13' Fe' C11' C16' -158.9(3) . . . . ?
C14' Fe' C11' C16' 158.1(3) . . . . ?
P2' Fe' C11' C16' 118.1(2) . . . . ?
P1' Fe' C11' C16' -66.6(2) . . . . ?
C1' Fe' C11' C16' 30.0(2) . . . . ?
C15' C11' C12' C13' 0.6(2) . . . . ?
C16' C11' C12' C13' -168.2(2) . . . . ?
Fe' C11' C12' C13' 60.78(15) . . . . ?
C15' C11' C12' C17' 172.8(2) . . . . ?
C16' C11' C12' C17' 4.1(4) . . . . ?
Fe' C11' C12' C17' -127.0(2) . . . . ?
C15' C11' C12' Fe' -60.18(15) . . . . ?
C16' C11' C12' Fe' 131.0(2) . . . . ?
C15' Fe' C12' C11' 37.59(13) . . . . ?
C13' Fe' C12' C11' 118.49(19) . . . . ?
C14' Fe' C12' C11' 80.67(14) . . . . ?
P2' Fe' C12' C11' 135.05(12) . . . . ?
P1' Fe' C12' C11' -136.51(12) . . . . ?
C1' Fe' C12' C11' -36.70(17) . . . . ?
C15' Fe' C12' C13' -80.90(14) . . . . ?
C11' Fe' C12' C13' -118.49(19) . . . . ?
C14' Fe' C12' C13' -37.82(13) . . . . ?
P2' Fe' C12' C13' 16.6(2) . . . . ?
P1' Fe' C12' C13' 105.00(13) . . . . ?
C1' Fe' C12' C13' -155.19(13) . . . . ?
C15' Fe' C12' C17' 157.0(2) . . . . ?
C11' Fe' C12' C17' 119.4(3) . . . . ?
C13' Fe' C12' C17' -122.1(3) . . . . ?
C14' Fe' C12' C17' -159.9(2) . . . . ?
P2' Fe' C12' C17' -105.5(2) . . . . ?
P1' Fe' C12' C17' -17.1(2) . . . . ?
C1' Fe' C12' C17' 82.7(2) . . . . ?
C11' C12' C13' C14' 0.2(2) . . . . ?
C17' C12' C13' C14' -171.8(2) . . . . ?
Fe' C12' C13' C14' 60.98(14) . . . . ?
C11' C12' C13' C18' 170.2(2) . . . . ?
C17' C12' C13' C18' -1.8(4) . . . . ?
Fe' C12' C13' C18' -129.0(2) . . . . ?
C11' C12' C13' Fe' -60.73(15) . . . . ?
C17' C12' C13' Fe' 127.2(2) . . . . ?
C15' Fe' C13' C14' -36.84(12) . . . . ?
C12' Fe' C13' C14' -117.58(18) . . . . ?
C11' Fe' C13' C14' -80.25(13) . . . . ?
P2' Fe' C13' C14' 71.83(12) . . . . ?
P1' Fe' C13' C14' 159.75(11) . . . . ?
C1' Fe' C13' C14' -56.6(3) . . . . ?
C15' Fe' C13' C12' 80.75(14) . . . . ?
C11' Fe' C13' C12' 37.33(13) . . . . ?
C14' Fe' C13' C12' 117.58(18) . . . . ?
P2' Fe' C13' C12' -170.59(11) . . . . ?
P1' Fe' C13' C12' -82.66(13) . . . . ?
C1' Fe' C13' C12' 61.0(3) . . . . ?
C15' Fe' C13' C18' -157.3(3) . . . . ?
C12' Fe' C13' C18' 121.9(3) . . . . ?
C11' Fe' C13' C18' 159.3(3) . . . . ?
C14' Fe' C13' C18' -120.5(3) . . . . ?
P2' Fe' C13' C18' -48.6(2) . . . . ?
P1' Fe' C13' C18' 39.3(2) . . . . ?
C1' Fe' C13' C18' -177.0(2) . . . . ?
C12' C13' C14' C15' -1.0(2) . . . . ?
C18' C13' C14' C15' -171.2(2) . . . . ?
Fe' C13' C14' C15' 59.61(15) . . . . ?
C12' C13' C14' C19' 167.5(2) . . . . ?
C18' C13' C14' C19' -2.7(3) . . . . ?
Fe' C13' C14' C19' -131.9(2) . . . . ?
C12' C13' C14' Fe' -60.62(14) . . . . ?
C18' C13' C14' Fe' 129.2(2) . . . . ?
C12' Fe' C14' C15' -81.46(13) . . . . ?
C11' Fe' C14' C15' -38.39(12) . . . . ?
C13' Fe' C14' C15' -119.72(18) . . . . ?
P2' Fe' C14' C15' 124.86(12) . . . . ?
P1' Fe' C14' C15' -151.29(10) . . . . ?
C1' Fe' C14' C15' 36.92(16) . . . . ?
C15' Fe' C14' C13' 119.72(18) . . . . ?
C12' Fe' C14' C13' 38.26(12) . . . . ?
C11' Fe' C14' C13' 81.33(13) . . . . ?
P2' Fe' C14' C13' -115.42(12) . . . . ?
P1' Fe' C14' C13' -31.57(16) . . . . ?
C1' Fe' C14' C13' 156.64(12) . . . . ?
C15' Fe' C14' C19' -118.7(3) . . . . ?
C12' Fe' C14' C19' 159.8(3) . . . . ?
C11' Fe' C14' C19' -157.1(3) . . . . ?
C13' Fe' C14' C19' 121.6(3) . . . . ?
P2' Fe' C14' C19' 6.1(2) . . . . ?
P1' Fe' C14' C19' 90.0(3) . . . . ?
C1' Fe' C14' C19' -81.8(3) . . . . ?
C13' C14' C15' C11' 1.4(2) . . . . ?
C19' C14' C15' C11' -167.3(2) . . . . ?
Fe' C14' C15' C11' 61.31(14) . . . . ?
C13' C14' C15' C20' 174.6(2) . . . . ?
C19' C14' C15' C20' 5.9(3) . . . . ?
Fe' C14' C15' C20' -125.5(2) . . . . ?
C13' C14' C15' Fe' -59.93(15) . . . . ?
C19' C14' C15' Fe' 131.4(2) . . . . ?
C12' C11' C15' C14' -1.2(2) . . . . ?
C16' C11' C15' C14' 167.6(2) . . . . ?
Fe' C11' C15' C14' -61.63(14) . . . . ?
C12' C11' C15' C20' -174.2(2) . . . . ?
C16' C11' C15' C20' -5.4(4) . . . . ?
Fe' C11' C15' C20' 125.3(2) . . . . ?
C12' C11' C15' Fe' 60.42(15) . . . . ?
C16' C11' C15' Fe' -130.7(2) . . . . ?
C12' Fe' C15' C14' 80.14(13) . . . . ?
C11' Fe' C15' C14' 117.30(18) . . . . ?
C13' Fe' C15' C14' 36.75(12) . . . . ?
P2' Fe' C15' C14' -63.65(13) . . . . ?
P1' Fe' C15' C14' 99.3(2) . . . . ?
C1' Fe' C15' C14' -150.75(13) . . . . ?
C12' Fe' C15' C11' -37.16(13) . . . . ?
C13' Fe' C15' C11' -80.55(14) . . . . ?
C14' Fe' C15' C11' -117.30(18) . . . . ?
P2' Fe' C15' C11' 179.05(11) . . . . ?
P1' Fe' C15' C11' -18.0(3) . . . . ?
C1' Fe' C15' C11' 91.96(13) . . . . ?
C12' Fe' C15' C20' -159.4(2) . . . . ?
C11' Fe' C15' C20' -122.2(3) . . . . ?
C13' Fe' C15' C20' 157.2(2) . . . . ?
C14' Fe' C15' C20' 120.5(3) . . . . ?
P2' Fe' C15' C20' 56.8(2) . . . . ?
P1' Fe' C15' C20' -140.21(18) . . . . ?
C1' Fe' C15' C20' -30.2(2) . . . . ?
C22' P1' C23' C24' -105.38(17) . . . . ?
C21' P1' C23' C24' 154.87(17) . . . . ?
Fe' P1' C23' C24' 20.02(18) . . . . ?
P1' C23' C24' P2' 4.5(2) . . . . ?
C25' P2' C24' C23' -157.72(16) . . . . ?
C26' P2' C24' C23' 100.61(17) . . . . ?
Fe' P2' C24' C23' -27.66(17) . . . . ?

_diffrn_measured_fraction_theta_max    0.999
_diffrn_reflns_theta_full              27.10
_diffrn_measured_fraction_theta_full   0.999
_refine_diff_density_max    0.573
_refine_diff_density_min   -0.255
_refine_diff_density_rms    0.066


#=============================================================================
#  end of cif data for "andyg57" (compound 5)
#=============================================================================

#=============================================================================
#  cif data for "andyg55" (compound syn-6)
#=============================================================================


data_andyg55

_audit_creation_method            SHELXL-97
_chemical_name_systematic
;
 ?
;
_chemical_name_common             ?
_chemical_melting_point           ?
_chemical_formula_moiety          ?
_chemical_formula_sum
 'C20 H26 Fe I'
_chemical_formula_weight          449.16

loop_
 _atom_type_symbol
 _atom_type_description
 _atom_type_scat_dispersion_real
 _atom_type_scat_dispersion_imag
 _atom_type_scat_source
 'C'  'C'   0.0181   0.0091
 'International Tables Vol C Tables 4.2.6.8 and 6.1.1.4'
 'H'  'H'   0.0000   0.0000
 'International Tables Vol C Tables 4.2.6.8 and 6.1.1.4'
 'Fe'  'Fe'  -1.1336   3.1974
 'International Tables Vol C Tables 4.2.6.8 and 6.1.1.4'
 'I'  'I'  -0.3257   6.8362
 'International Tables Vol C Tables 4.2.6.8 and 6.1.1.4'

_symmetry_cell_setting            monoclinic
_symmetry_space_group_name_H-M    'P 21/c'

loop_
 _symmetry_equiv_pos_as_xyz
 'x, y, z'
 '-x, y+1/2, -z+1/2'
 '-x, -y, -z'
 'x, -y-1/2, z-1/2'

_cell_length_a                    8.5902(2)
_cell_length_b                    9.1456(2)
_cell_length_c                    23.3844(6)
_cell_angle_alpha                 90.00
_cell_angle_beta                  95.068(2)
_cell_angle_gamma                 90.00
_cell_volume                      1829.96(7)
_cell_formula_units_Z             4
_cell_measurement_temperature     100(2)
_cell_measurement_reflns_used     16445
_cell_measurement_theta_min       3.7922
_cell_measurement_theta_max       75.9477

_exptl_crystal_description        prism
_exptl_crystal_colour             'dark red'
_exptl_crystal_size_max           0.06
_exptl_crystal_size_mid           0.03
_exptl_crystal_size_min           0.03
_exptl_crystal_density_meas       ?
_exptl_crystal_density_diffrn     1.630
_exptl_crystal_density_method     'not measured'
_exptl_crystal_F_000              900
_exptl_absorpt_coefficient_mu     19.785
_exptl_absorpt_correction_type    multi-scan
_exptl_absorpt_correction_T_min   0.34782
_exptl_absorpt_correction_T_max   1.00000
_exptl_absorpt_process_details
;
CrysAlisPro, Oxford Diffraction Ltd.,
Version 1.171.34.40 (release 27-08-2010 CrysAlis171 .NET)
(compiled Aug 27 2010,11:50:40)
;

_exptl_special_details
;
 ?
;

_diffrn_ambient_temperature       100(2)
_diffrn_radiation_wavelength      1.54184
_diffrn_radiation_type            'Cu K\a'
_diffrn_radiation_source          'Nova (Cu) X-ray Source'
_diffrn_radiation_monochromator   mirror
_diffrn_measurement_device_type   'Oxford Diffraction Xcalibur, Atlas, Nova'
_diffrn_measurement_method        '\w scans'
_diffrn_detector_area_resol_mean  10.3543
_diffrn_standards_number          ?
_diffrn_standards_interval_count  ?
_diffrn_standards_interval_time   ?
_diffrn_standards_decay_%         ?
_diffrn_reflns_number             27352
_diffrn_reflns_av_R_equivalents   0.0590
_diffrn_reflns_av_sigmaI/netI     0.0265
_diffrn_reflns_limit_h_min        -10
_diffrn_reflns_limit_h_max        10
_diffrn_reflns_limit_k_min        -11
_diffrn_reflns_limit_k_max        10
_diffrn_reflns_limit_l_min        -29
_diffrn_reflns_limit_l_max        29
_diffrn_reflns_theta_min          3.80
_diffrn_reflns_theta_max          76.09
_reflns_number_total              3807
_reflns_number_gt                 3558
_reflns_threshold_expression      >2sigma(I)

_computing_data_collection
;
CrysAlisPro, Oxford Diffraction Ltd.,
Version 1.171.34.40 (release 27-08-2010 CrysAlis171 .NET)
(compiled Aug 27 2010,11:50:40)
;
_computing_cell_refinement
;
CrysAlisPro, Oxford Diffraction Ltd.,
Version 1.171.34.40 (release 27-08-2010 CrysAlis171 .NET)
(compiled Aug 27 2010,11:50:40)
;
_computing_data_reduction
;
CrysAlisPro, Oxford Diffraction Ltd.,
Version 1.171.34.40 (release 27-08-2010 CrysAlis171 .NET)
(compiled Aug 27 2010,11:50:40)
;
_computing_structure_solution     'SHELXS-97 (Sheldrick, 1990)'
_computing_structure_refinement   'SHELXL-97 (Sheldrick, 1997)'
_computing_molecular_graphics     'BRUKER XP'
_computing_publication_material   'SHELXL-97'

_refine_special_details
;
 Refinement of F^2^ against ALL reflections.  The weighted R-factor wR and
 goodness of fit S are based on F^2^, conventional R-factors R are based
 on F, with F set to zero for negative F^2^. The threshold expression of
 F^2^ > 2sigma(F^2^) is used only for calculating R-factors(gt) etc. and is
 not relevant to the choice of reflections for refinement.  R-factors based
 on F^2^ are statistically about twice as large as those based on F, and R-
 factors based on ALL data will be even larger.

 The hydrogens of the C1 and C3 atoms were refined freely, but with C-H
 distance restraints (SADI).
;

_refine_ls_structure_factor_coef  Fsqd
_refine_ls_matrix_type            full
_refine_ls_weighting_scheme       calc
_refine_ls_weighting_details
 'calc w=1/[\s^2^(Fo^2^)+(0.0636P)^2^+1.7090P] where P=(Fo^2^+2Fc^2^)/3'
_atom_sites_solution_primary      direct
_atom_sites_solution_secondary    difmap
_atom_sites_solution_hydrogens    geom
_refine_ls_hydrogen_treatment     mixed
_refine_ls_extinction_method      none
_refine_ls_extinction_coef        ?
_refine_ls_number_reflns          3807
_refine_ls_number_parameters      217
_refine_ls_number_restraints      3
_refine_ls_R_factor_all           0.0388
_refine_ls_R_factor_gt            0.0363
_refine_ls_wR_factor_ref          0.0957
_refine_ls_wR_factor_gt           0.0935
_refine_ls_goodness_of_fit_ref    1.048
_refine_ls_restrained_S_all       1.048
_refine_ls_shift/su_max           0.001
_refine_ls_shift/su_mean          0.000

loop_
 _atom_site_label
 _atom_site_type_symbol
 _atom_site_fract_x
 _atom_site_fract_y
 _atom_site_fract_z
 _atom_site_U_iso_or_equiv
 _atom_site_adp_type
 _atom_site_occupancy
 _atom_site_symmetry_multiplicity
 _atom_site_calc_flag
 _atom_site_refinement_flags
 _atom_site_disorder_assembly
 _atom_site_disorder_group
Fe Fe 0.68848(6) 0.63237(5) 0.14803(2) 0.01955(13) Uani 1 1 d . . .
I I 0.40522(2) 0.53608(2) 0.124623(9) 0.02761(10) Uani 1 1 d . . .
C1 C 0.7206(4) 0.6039(4) 0.23752(13) 0.0211(6) Uani 1 1 d D . .
H1A H 0.640(4) 0.618(5) 0.2550(17) 0.029(11) Uiso 1 1 d D . .
H1B H 0.802(4) 0.652(5) 0.2472(19) 0.030(11) Uiso 1 1 d D . .
C2 C 0.7329(4) 0.4685(3) 0.20973(15) 0.0236(7) Uani 1 1 d . . .
C3 C 0.8505(4) 0.4610(3) 0.17073(15) 0.0232(7) Uani 1 1 d D . .
H3 H 0.935(4) 0.508(4) 0.1790(17) 0.020(9) Uiso 1 1 d D . .
C4 C 0.8804(4) 0.3342(3) 0.13399(14) 0.0223(6) Uani 1 1 d . . .
C5 C 1.0342(4) 0.2809(4) 0.13568(15) 0.0270(7) Uani 1 1 d . . .
H5 H 1.1150 0.3294 0.1587 0.032 Uiso 1 1 calc R . .
C6 C 1.0699(5) 0.1587(4) 0.10425(17) 0.0321(8) Uani 1 1 d . . .
H6 H 1.1741 0.1229 0.1066 0.038 Uiso 1 1 calc R . .
C7 C 0.9543(5) 0.0888(4) 0.06951(16) 0.0338(8) Uani 1 1 d . . .
H7 H 0.9783 0.0036 0.0487 0.041 Uiso 1 1 calc R . .
C8 C 0.8033(5) 0.1436(4) 0.06512(15) 0.0319(8) Uani 1 1 d . . .
H8 H 0.7247 0.0975 0.0403 0.038 Uiso 1 1 calc R . .
C9 C 0.7657(4) 0.2655(4) 0.09679(15) 0.0263(7) Uani 1 1 d . . .
H9 H 0.6619 0.3025 0.0932 0.032 Uiso 1 1 calc R . .
C10 C 0.6279(4) 0.3434(4) 0.22172(15) 0.0258(7) Uani 1 1 d . . .
H10A H 0.6781 0.2835 0.2528 0.039 Uiso 1 1 calc R . .
H10B H 0.6084 0.2836 0.1871 0.039 Uiso 1 1 calc R . .
H10C H 0.5285 0.3814 0.2331 0.039 Uiso 1 1 calc R . .
C11 C 0.7507(4) 0.8632(3) 0.15794(14) 0.0234(6) Uani 1 1 d . . .
C12 C 0.6264(4) 0.8486(4) 0.11506(15) 0.0251(7) Uani 1 1 d . . .
C13 C 0.6774(4) 0.7572(4) 0.07037(14) 0.0262(7) Uani 1 1 d . . .
C14 C 0.8325(4) 0.7134(4) 0.08631(14) 0.0240(6) Uani 1 1 d . . .
C15 C 0.8784(4) 0.7778(3) 0.14147(14) 0.0226(6) Uani 1 1 d . . .
C16 C 0.7589(5) 0.9636(3) 0.20902(16) 0.0285(7) Uani 1 1 d . . .
H16A H 0.8217 1.0497 0.2014 0.043 Uiso 1 1 calc R . .
H16B H 0.8072 0.9120 0.2428 0.043 Uiso 1 1 calc R . .
H16C H 0.6532 0.9945 0.2162 0.043 Uiso 1 1 calc R . .
C17 C 0.4706(4) 0.9270(4) 0.11397(16) 0.0275(7) Uani 1 1 d . . .
H17A H 0.4349 0.9274 0.1526 0.041 Uiso 1 1 calc R . .
H17B H 0.3935 0.8764 0.0876 0.041 Uiso 1 1 calc R . .
H17C H 0.4826 1.0279 0.1009 0.041 Uiso 1 1 calc R . .
C18 C 0.5875(5) 0.7249(5) 0.01382(16) 0.0346(8) Uani 1 1 d . . .
H18A H 0.6132 0.7978 -0.0146 0.052 Uiso 1 1 calc R . .
H18B H 0.4752 0.7285 0.0183 0.052 Uiso 1 1 calc R . .
H18C H 0.6153 0.6273 0.0008 0.052 Uiso 1 1 calc R . .
C19 C 0.9351(4) 0.6288(4) 0.04965(16) 0.0309(7) Uani 1 1 d . . .
H19A H 0.8723 0.5558 0.0273 0.046 Uiso 1 1 calc R . .
H19B H 1.0174 0.5794 0.0742 0.046 Uiso 1 1 calc R . .
H19C H 0.9828 0.6958 0.0235 0.046 Uiso 1 1 calc R . .
C20 C 1.0381(4) 0.7795(4) 0.17273(16) 0.0285(7) Uani 1 1 d . . .
H20A H 1.0835 0.8773 0.1703 0.043 Uiso 1 1 calc R . .
H20B H 1.1046 0.7081 0.1553 0.043 Uiso 1 1 calc R . .
H20C H 1.0307 0.7541 0.2131 0.043 Uiso 1 1 calc R . .

loop_
 _atom_site_aniso_label
 _atom_site_aniso_U_11
 _atom_site_aniso_U_22
 _atom_site_aniso_U_33
 _atom_site_aniso_U_23
 _atom_site_aniso_U_13
 _atom_site_aniso_U_12
Fe 0.0210(3) 0.0151(2) 0.0224(2) 0.00022(17) 0.00120(18) 0.00134(17)
I 0.02198(14) 0.02611(14) 0.03429(15) 0.00068(7) -0.00001(9) -0.00044(7)
C1 0.0219(15) 0.0215(15) 0.0199(14) -0.0035(12) 0.0024(11) -0.0006(12)
C2 0.0277(17) 0.0192(16) 0.0235(15) 0.0032(11) 0.0000(12) 0.0027(12)
C3 0.0216(16) 0.0178(15) 0.0296(17) 0.0021(12) -0.0018(13) -0.0005(11)
C4 0.0263(16) 0.0161(14) 0.0250(15) 0.0041(11) 0.0041(12) 0.0034(12)
C5 0.0301(17) 0.0213(15) 0.0300(17) 0.0042(13) 0.0048(13) 0.0007(13)
C6 0.0342(19) 0.0272(17) 0.0363(19) 0.0068(14) 0.0117(15) 0.0096(14)
C7 0.054(2) 0.0190(16) 0.0305(18) -0.0005(13) 0.0180(16) 0.0064(16)
C8 0.047(2) 0.0222(16) 0.0260(17) -0.0016(13) 0.0028(15) -0.0034(15)
C9 0.0327(18) 0.0195(15) 0.0270(16) 0.0009(12) 0.0045(13) 0.0001(13)
C10 0.0291(17) 0.0200(15) 0.0288(16) 0.0020(12) 0.0053(13) 0.0012(13)
C11 0.0301(17) 0.0138(14) 0.0265(16) -0.0004(12) 0.0042(12) -0.0002(12)
C12 0.0288(17) 0.0196(14) 0.0267(16) 0.0041(12) 0.0018(12) 0.0031(13)
C13 0.0322(18) 0.0218(15) 0.0245(16) 0.0031(12) 0.0022(13) -0.0017(13)
C14 0.0299(17) 0.0187(14) 0.0244(15) 0.0034(12) 0.0072(12) 0.0002(13)
C15 0.0221(15) 0.0160(14) 0.0297(16) 0.0023(12) 0.0017(12) 0.0002(12)
C16 0.040(2) 0.0176(16) 0.0287(17) -0.0030(12) 0.0058(15) 0.0005(13)
C17 0.0259(17) 0.0217(15) 0.0345(18) 0.0051(13) 0.0011(13) 0.0079(13)
C18 0.040(2) 0.0370(19) 0.0261(17) 0.0016(15) -0.0024(14) -0.0010(16)
C19 0.0349(19) 0.0256(17) 0.0341(18) -0.0006(14) 0.0135(15) 0.0033(14)
C20 0.0263(17) 0.0220(15) 0.0363(18) -0.0006(14) -0.0026(14) -0.0006(13)

_geom_special_details
;
 All esds (except the esd in the dihedral angle between two l.s. planes)
 are estimated using the full covariance matrix.  The cell esds are taken
 into account individually in the estimation of esds in distances, angles
 and torsion angles; correlations between esds in cell parameters are only
 used when they are defined by crystal symmetry.  An approximate (isotropic)
 treatment of cell esds is used for estimating esds involving l.s. planes.
;

loop_
 _geom_bond_atom_site_label_1
 _geom_bond_atom_site_label_2
 _geom_bond_distance
 _geom_bond_site_symmetry_2
 _geom_bond_publ_flag
Fe C2 2.092(3) . ?
Fe C1 2.102(3) . ?
Fe C14 2.116(3) . ?
Fe C15 2.121(3) . ?
Fe C3 2.132(3) . ?
Fe C13 2.140(3) . ?
Fe C12 2.172(3) . ?
Fe C11 2.185(3) . ?
Fe I 2.6001(5) . ?
C1 C2 1.406(4) . ?
C2 C3 1.421(5) . ?
C2 C10 1.499(5) . ?
C3 C4 1.480(4) . ?
C4 C9 1.404(5) . ?
C4 C5 1.405(5) . ?
C5 C6 1.387(5) . ?
C6 C7 1.383(6) . ?
C7 C8 1.386(6) . ?
C8 C9 1.392(5) . ?
C11 C12 1.405(5) . ?
C11 C15 1.427(5) . ?
C11 C16 1.503(4) . ?
C12 C13 1.437(5) . ?
C12 C17 1.516(5) . ?
C13 C14 1.410(5) . ?
C13 C18 1.501(5) . ?
C14 C15 1.441(5) . ?
C14 C19 1.498(5) . ?
C15 C20 1.496(5) . ?

loop_
 _geom_angle_atom_site_label_1
 _geom_angle_atom_site_label_2
 _geom_angle_atom_site_label_3
 _geom_angle
 _geom_angle_site_symmetry_1
 _geom_angle_site_symmetry_3
 _geom_angle_publ_flag
C2 Fe C1 39.17(13) . . ?
C2 Fe C14 129.73(14) . . ?
C1 Fe C14 133.55(13) . . ?
C2 Fe C15 113.86(13) . . ?
C1 Fe C15 96.64(13) . . ?
C14 Fe C15 39.77(13) . . ?
C2 Fe C3 39.32(14) . . ?
C1 Fe C3 68.63(13) . . ?
C14 Fe C3 91.08(13) . . ?
C15 Fe C3 89.41(13) . . ?
C2 Fe C13 163.58(14) . . ?
C1 Fe C13 154.52(13) . . ?
C14 Fe C13 38.67(14) . . ?
C15 Fe C13 65.21(13) . . ?
C3 Fe C13 125.63(14) . . ?
C2 Fe C12 157.10(13) . . ?
C1 Fe C12 118.21(13) . . ?
C14 Fe C12 65.12(13) . . ?
C15 Fe C12 64.50(13) . . ?
C3 Fe C12 153.15(13) . . ?
C13 Fe C12 38.91(13) . . ?
C2 Fe C11 126.23(13) . . ?
C1 Fe C11 90.28(12) . . ?
C14 Fe C11 65.29(12) . . ?
C15 Fe C11 38.67(12) . . ?
C3 Fe C11 122.39(13) . . ?
C13 Fe C11 64.31(13) . . ?
C12 Fe C11 37.62(13) . . ?
C2 Fe I 90.74(10) . . ?
C1 Fe I 101.87(9) . . ?
C14 Fe I 124.58(10) . . ?
C15 Fe I 155.32(9) . . ?
C3 Fe I 112.45(9) . . ?
C13 Fe I 91.81(10) . . ?
C12 Fe I 92.16(9) . . ?
C11 Fe I 124.40(9) . . ?
C2 C1 Fe 70.00(18) . . ?
C1 C2 C3 115.2(3) . . ?
C1 C2 C10 121.0(3) . . ?
C3 C2 C10 123.8(3) . . ?
C1 C2 Fe 70.83(18) . . ?
C3 C2 Fe 71.87(19) . . ?
C10 C2 Fe 126.8(2) . . ?
C2 C3 C4 125.5(3) . . ?
C2 C3 Fe 68.81(18) . . ?
C4 C3 Fe 125.1(2) . . ?
C9 C4 C5 118.0(3) . . ?
C9 C4 C3 124.2(3) . . ?
C5 C4 C3 117.8(3) . . ?
C6 C5 C4 121.0(3) . . ?
C7 C6 C5 120.2(3) . . ?
C6 C7 C8 119.7(3) . . ?
C7 C8 C9 120.7(4) . . ?
C8 C9 C4 120.3(3) . . ?
C12 C11 C15 108.0(3) . . ?
C12 C11 C16 127.2(3) . . ?
C15 C11 C16 124.4(3) . . ?
C12 C11 Fe 70.69(19) . . ?
C15 C11 Fe 68.23(18) . . ?
C16 C11 Fe 131.9(2) . . ?
C11 C12 C13 108.2(3) . . ?
C11 C12 C17 125.5(3) . . ?
C13 C12 C17 126.0(3) . . ?
C11 C12 Fe 71.69(18) . . ?
C13 C12 Fe 69.34(18) . . ?
C17 C12 Fe 128.7(2) . . ?
C14 C13 C12 108.4(3) . . ?
C14 C13 C18 125.3(3) . . ?
C12 C13 C18 126.1(3) . . ?
C14 C13 Fe 69.74(18) . . ?
C12 C13 Fe 71.74(19) . . ?
C18 C13 Fe 128.5(3) . . ?
C13 C14 C15 107.3(3) . . ?
C13 C14 C19 125.9(3) . . ?
C15 C14 C19 126.5(3) . . ?
C13 C14 Fe 71.58(19) . . ?
C15 C14 Fe 70.29(18) . . ?
C19 C14 Fe 128.2(2) . . ?
C11 C15 C14 108.0(3) . . ?
C11 C15 C20 123.8(3) . . ?
C14 C15 C20 127.4(3) . . ?
C11 C15 Fe 73.10(19) . . ?
C14 C15 Fe 69.93(18) . . ?
C20 C15 Fe 130.4(2) . . ?

loop_
 _geom_torsion_atom_site_label_1
 _geom_torsion_atom_site_label_2
 _geom_torsion_atom_site_label_3
 _geom_torsion_atom_site_label_4
 _geom_torsion
 _geom_torsion_site_symmetry_1
 _geom_torsion_site_symmetry_2
 _geom_torsion_site_symmetry_3
 _geom_torsion_site_symmetry_4
 _geom_torsion_publ_flag
C14 Fe C1 C2 -103.3(2) . . . . ?
C15 Fe C1 C2 -120.1(2) . . . . ?
C3 Fe C1 C2 -33.4(2) . . . . ?
C13 Fe C1 C2 -162.7(3) . . . . ?
C12 Fe C1 C2 175.3(2) . . . . ?
C11 Fe C1 C2 -158.4(2) . . . . ?
I Fe C1 C2 76.29(19) . . . . ?
Fe C1 C2 C3 58.2(3) . . . . ?
Fe C1 C2 C10 -122.1(3) . . . . ?
C14 Fe C2 C1 113.5(2) . . . . ?
C15 Fe C2 C1 69.9(2) . . . . ?
C3 Fe C2 C1 126.0(3) . . . . ?
C13 Fe C2 C1 153.0(4) . . . . ?
C12 Fe C2 C1 -10.7(5) . . . . ?
C11 Fe C2 C1 27.2(3) . . . . ?
I Fe C2 C1 -108.04(19) . . . . ?
C1 Fe C2 C3 -126.0(3) . . . . ?
C14 Fe C2 C3 -12.6(3) . . . . ?
C15 Fe C2 C3 -56.1(2) . . . . ?
C13 Fe C2 C3 27.0(6) . . . . ?
C12 Fe C2 C3 -136.7(3) . . . . ?
C11 Fe C2 C3 -98.8(2) . . . . ?
I Fe C2 C3 125.93(18) . . . . ?
C1 Fe C2 C10 114.8(4) . . . . ?
C14 Fe C2 C10 -131.7(3) . . . . ?
C15 Fe C2 C10 -175.2(3) . . . . ?
C3 Fe C2 C10 -119.1(4) . . . . ?
C13 Fe C2 C10 -92.1(6) . . . . ?
C12 Fe C2 C10 104.1(4) . . . . ?
C11 Fe C2 C10 142.0(3) . . . . ?
I Fe C2 C10 6.8(3) . . . . ?
C1 C2 C3 C4 -176.3(3) . . . . ?
C10 C2 C3 C4 4.0(5) . . . . ?
Fe C2 C3 C4 -118.7(3) . . . . ?
C1 C2 C3 Fe -57.6(3) . . . . ?
C10 C2 C3 Fe 122.7(3) . . . . ?
C1 Fe C3 C2 33.3(2) . . . . ?
C14 Fe C3 C2 170.4(2) . . . . ?
C15 Fe C3 C2 130.6(2) . . . . ?
C13 Fe C3 C2 -170.9(2) . . . . ?
C12 Fe C3 C2 143.8(3) . . . . ?
C11 Fe C3 C2 109.3(2) . . . . ?
I Fe C3 C2 -61.2(2) . . . . ?
C2 Fe C3 C4 119.2(4) . . . . ?
C1 Fe C3 C4 152.5(3) . . . . ?
C14 Fe C3 C4 -70.4(3) . . . . ?
C15 Fe C3 C4 -110.2(3) . . . . ?
C13 Fe C3 C4 -51.7(3) . . . . ?
C12 Fe C3 C4 -97.0(4) . . . . ?
C11 Fe C3 C4 -131.5(3) . . . . ?
I Fe C3 C4 58.0(3) . . . . ?
C2 C3 C4 C9 52.8(5) . . . . ?
Fe C3 C4 C9 -34.7(5) . . . . ?
C2 C3 C4 C5 -128.5(4) . . . . ?
Fe C3 C4 C5 144.0(3) . . . . ?
C9 C4 C5 C6 -3.9(5) . . . . ?
C3 C4 C5 C6 177.3(3) . . . . ?
C4 C5 C6 C7 1.5(5) . . . . ?
C5 C6 C7 C8 1.6(5) . . . . ?
C6 C7 C8 C9 -2.1(5) . . . . ?
C7 C8 C9 C4 -0.4(5) . . . . ?
C5 C4 C9 C8 3.4(5) . . . . ?
C3 C4 C9 C8 -177.9(3) . . . . ?
C2 Fe C11 C12 -156.9(2) . . . . ?
C1 Fe C11 C12 -140.2(2) . . . . ?
C14 Fe C11 C12 80.7(2) . . . . ?
C15 Fe C11 C12 119.5(3) . . . . ?
C3 Fe C11 C12 155.2(2) . . . . ?
C13 Fe C11 C12 37.8(2) . . . . ?
I Fe C11 C12 -35.5(2) . . . . ?
C2 Fe C11 C15 83.5(2) . . . . ?
C1 Fe C11 C15 100.3(2) . . . . ?
C14 Fe C11 C15 -38.83(19) . . . . ?
C3 Fe C11 C15 35.7(2) . . . . ?
C13 Fe C11 C15 -81.7(2) . . . . ?
C12 Fe C11 C15 -119.5(3) . . . . ?
I Fe C11 C15 -155.06(16) . . . . ?
C2 Fe C11 C16 -33.8(4) . . . . ?
C1 Fe C11 C16 -17.1(3) . . . . ?
C14 Fe C11 C16 -156.2(4) . . . . ?
C15 Fe C11 C16 -117.4(4) . . . . ?
C3 Fe C11 C16 -81.7(4) . . . . ?
C13 Fe C11 C16 160.9(4) . . . . ?
C12 Fe C11 C16 123.1(4) . . . . ?
I Fe C11 C16 87.6(3) . . . . ?
C15 C11 C12 C13 -1.8(4) . . . . ?
C16 C11 C12 C13 171.5(3) . . . . ?
Fe C11 C12 C13 -60.0(2) . . . . ?
C15 C11 C12 C17 -176.9(3) . . . . ?
C16 C11 C12 C17 -3.6(6) . . . . ?
Fe C11 C12 C17 125.0(3) . . . . ?
C15 C11 C12 Fe 58.2(2) . . . . ?
C16 C11 C12 Fe -128.5(3) . . . . ?
C2 Fe C12 C11 54.3(4) . . . . ?
C1 Fe C12 C11 46.6(2) . . . . ?
C14 Fe C12 C11 -81.2(2) . . . . ?
C15 Fe C12 C11 -37.0(2) . . . . ?
C3 Fe C12 C11 -51.7(4) . . . . ?
C13 Fe C12 C11 -118.5(3) . . . . ?
I Fe C12 C11 151.33(19) . . . . ?
C2 Fe C12 C13 172.8(3) . . . . ?
C1 Fe C12 C13 165.1(2) . . . . ?
C14 Fe C12 C13 37.3(2) . . . . ?
C15 Fe C12 C13 81.4(2) . . . . ?
C3 Fe C12 C13 66.8(4) . . . . ?
C11 Fe C12 C13 118.5(3) . . . . ?
I Fe C12 C13 -90.20(19) . . . . ?
C2 Fe C12 C17 -67.0(5) . . . . ?
C1 Fe C12 C17 -74.7(3) . . . . ?
C14 Fe C12 C17 157.5(4) . . . . ?
C15 Fe C12 C17 -158.3(4) . . . . ?
C3 Fe C12 C17 -172.9(3) . . . . ?
C13 Fe C12 C17 120.2(4) . . . . ?
C11 Fe C12 C17 -121.3(4) . . . . ?
I Fe C12 C17 30.0(3) . . . . ?
C11 C12 C13 C14 1.1(4) . . . . ?
C17 C12 C13 C14 176.1(3) . . . . ?
Fe C12 C13 C14 -60.4(2) . . . . ?
C11 C12 C13 C18 -173.7(3) . . . . ?
C17 C12 C13 C18 1.4(6) . . . . ?
Fe C12 C13 C18 124.9(4) . . . . ?
C11 C12 C13 Fe 61.5(2) . . . . ?
C17 C12 C13 Fe -123.5(3) . . . . ?
C2 Fe C13 C14 -51.6(6) . . . . ?
C1 Fe C13 C14 86.6(4) . . . . ?
C15 Fe C13 C14 38.9(2) . . . . ?
C3 Fe C13 C14 -30.9(3) . . . . ?
C12 Fe C13 C14 118.4(3) . . . . ?
C11 Fe C13 C14 81.9(2) . . . . ?
I Fe C13 C14 -150.38(19) . . . . ?
C2 Fe C13 C12 -170.0(4) . . . . ?
C1 Fe C13 C12 -31.8(4) . . . . ?
C14 Fe C13 C12 -118.4(3) . . . . ?
C15 Fe C13 C12 -79.5(2) . . . . ?
C3 Fe C13 C12 -149.3(2) . . . . ?
C11 Fe C13 C12 -36.5(2) . . . . ?
I Fe C13 C12 91.20(19) . . . . ?
C2 Fe C13 C18 68.0(6) . . . . ?
C1 Fe C13 C18 -153.8(3) . . . . ?
C14 Fe C13 C18 119.6(4) . . . . ?
C15 Fe C13 C18 158.5(4) . . . . ?
C3 Fe C13 C18 88.7(4) . . . . ?
C12 Fe C13 C18 -122.0(4) . . . . ?
C11 Fe C13 C18 -158.6(4) . . . . ?
I Fe C13 C18 -30.8(3) . . . . ?
C12 C13 C14 C15 0.1(4) . . . . ?
C18 C13 C14 C15 174.9(3) . . . . ?
Fe C13 C14 C15 -61.6(2) . . . . ?
C12 C13 C14 C19 -174.0(3) . . . . ?
C18 C13 C14 C19 0.8(5) . . . . ?
Fe C13 C14 C19 124.3(3) . . . . ?
C12 C13 C14 Fe 61.7(2) . . . . ?
C18 C13 C14 Fe -123.5(3) . . . . ?
C2 Fe C14 C13 163.3(2) . . . . ?
C1 Fe C14 C13 -143.7(2) . . . . ?
C15 Fe C14 C13 -116.9(3) . . . . ?
C3 Fe C14 C13 155.3(2) . . . . ?
C12 Fe C14 C13 -37.52(19) . . . . ?
C11 Fe C14 C13 -79.1(2) . . . . ?
I Fe C14 C13 36.9(2) . . . . ?
C2 Fe C14 C15 -79.9(2) . . . . ?
C1 Fe C14 C15 -26.8(3) . . . . ?
C3 Fe C14 C15 -87.77(19) . . . . ?
C13 Fe C14 C15 116.9(3) . . . . ?
C12 Fe C14 C15 79.4(2) . . . . ?
C11 Fe C14 C15 37.76(18) . . . . ?
I Fe C14 C15 153.75(15) . . . . ?
C2 Fe C14 C19 41.7(4) . . . . ?
C1 Fe C14 C19 94.8(3) . . . . ?
C15 Fe C14 C19 121.5(4) . . . . ?
C3 Fe C14 C19 33.8(3) . . . . ?
C13 Fe C14 C19 -121.6(4) . . . . ?
C12 Fe C14 C19 -159.1(4) . . . . ?
C11 Fe C14 C19 159.3(4) . . . . ?
I Fe C14 C19 -84.7(3) . . . . ?
C12 C11 C15 C14 1.9(4) . . . . ?
C16 C11 C15 C14 -171.7(3) . . . . ?
Fe C11 C15 C14 61.6(2) . . . . ?
C12 C11 C15 C20 172.5(3) . . . . ?
C16 C11 C15 C20 -1.0(5) . . . . ?
Fe C11 C15 C20 -127.8(3) . . . . ?
C12 C11 C15 Fe -59.7(2) . . . . ?
C16 C11 C15 Fe 126.8(3) . . . . ?
C13 C14 C15 C11 -1.2(4) . . . . ?
C19 C14 C15 C11 172.9(3) . . . . ?
Fe C14 C15 C11 -63.6(2) . . . . ?
C13 C14 C15 C20 -171.4(3) . . . . ?
C19 C14 C15 C20 2.6(5) . . . . ?
Fe C14 C15 C20 126.2(3) . . . . ?
C13 C14 C15 Fe 62.4(2) . . . . ?
C19 C14 C15 Fe -123.5(3) . . . . ?
C2 Fe C15 C11 -118.8(2) . . . . ?
C1 Fe C15 C11 -82.1(2) . . . . ?
C14 Fe C15 C11 117.1(3) . . . . ?
C3 Fe C15 C11 -150.5(2) . . . . ?
C13 Fe C15 C11 79.2(2) . . . . ?
C12 Fe C15 C11 36.04(19) . . . . ?
I Fe C15 C11 56.4(3) . . . . ?
C2 Fe C15 C14 124.1(2) . . . . ?
C1 Fe C15 C14 160.81(19) . . . . ?
C3 Fe C15 C14 92.4(2) . . . . ?
C13 Fe C15 C14 -37.87(19) . . . . ?
C12 Fe C15 C14 -81.0(2) . . . . ?
C11 Fe C15 C14 -117.1(3) . . . . ?
I Fe C15 C14 -60.7(3) . . . . ?
C2 Fe C15 C20 1.5(4) . . . . ?
C1 Fe C15 C20 38.2(3) . . . . ?
C14 Fe C15 C20 -122.6(4) . . . . ?
C3 Fe C15 C20 -30.2(3) . . . . ?
C13 Fe C15 C20 -160.5(4) . . . . ?
C12 Fe C15 C20 156.4(4) . . . . ?
C11 Fe C15 C20 120.3(4) . . . . ?
I Fe C15 C20 176.7(2) . . . . ?

_diffrn_measured_fraction_theta_max    0.993
_diffrn_reflns_theta_full              72.50
_diffrn_measured_fraction_theta_full   0.998
_refine_diff_density_max    1.873
_refine_diff_density_min   -0.946
_refine_diff_density_rms    0.129


#=============================================================================
#  end of cif data for "andyg55" (compound syn-6)
#=============================================================================

#=============================================================================
#  cif data for "andyg71" (compound syn-7)
#=============================================================================


data_andyg71

_audit_creation_method            SHELXL-97
_chemical_name_systematic
;
 ?
;
_chemical_name_common             ?
_chemical_melting_point           ?
_chemical_formula_moiety          ?
_chemical_formula_sum
 'C20 H26 Cl Fe'
_chemical_formula_weight          357.71

loop_
 _atom_type_symbol
 _atom_type_description
 _atom_type_scat_dispersion_real
 _atom_type_scat_dispersion_imag
 _atom_type_scat_source
 'C'  'C'   0.0033   0.0016
 'International Tables Vol C Tables 4.2.6.8 and 6.1.1.4'
 'H'  'H'   0.0000   0.0000
 'International Tables Vol C Tables 4.2.6.8 and 6.1.1.4'
 'Cl'  'Cl'   0.1484   0.1585
 'International Tables Vol C Tables 4.2.6.8 and 6.1.1.4'
 'Fe'  'Fe'   0.3463   0.8444
 'International Tables Vol C Tables 4.2.6.8 and 6.1.1.4'

_symmetry_cell_setting            monoclinic
_symmetry_space_group_name_H-M    'P 21/c'

loop_
 _symmetry_equiv_pos_as_xyz
 'x, y, z'
 '-x, y+1/2, -z+1/2'
 '-x, -y, -z'
 'x, -y-1/2, z-1/2'

_cell_length_a                    12.2535(2)
_cell_length_b                    9.2674(2)
_cell_length_c                    15.9496(4)
_cell_angle_alpha                 90.00
_cell_angle_beta                  97.815(2)
_cell_angle_gamma                 90.00
_cell_volume                      1794.38(7)
_cell_formula_units_Z             4
_cell_measurement_temperature     100(2)
_cell_measurement_reflns_used     13959
_cell_measurement_theta_min       2.1932
_cell_measurement_theta_max       29.2645

_exptl_crystal_description        prism
_exptl_crystal_colour             red
_exptl_crystal_size_max           0.20
_exptl_crystal_size_mid           0.17
_exptl_crystal_size_min           0.11
_exptl_crystal_density_meas       ?
_exptl_crystal_density_diffrn     1.324
_exptl_crystal_density_method     'not measured'
_exptl_crystal_F_000              756
_exptl_absorpt_coefficient_mu     0.984
_exptl_absorpt_correction_type    multi-scan
_exptl_absorpt_correction_T_min   0.98360
_exptl_absorpt_correction_T_max   1.00000
_exptl_absorpt_process_details
;
CrysAlisPro, Agilent Technologies,
Version 1.171.34.49 (release 20-01-2011 CrysAlis171 .NET)
(compiled Jan 20 2011,15:58:25)
;

_exptl_special_details
;
 ?
;

_diffrn_ambient_temperature       100(2)
_diffrn_radiation_wavelength      0.71073
_diffrn_radiation_type            'Mo K\a'
_diffrn_radiation_source          'Enhance (Mo) X-ray Source'
_diffrn_radiation_monochromator   graphite
_diffrn_measurement_device_type   'Oxford Diffraction Xcalibur, Eos'
_diffrn_measurement_method        '\w scans'
_diffrn_detector_area_resol_mean  16.1419
_diffrn_standards_number          ?
_diffrn_standards_interval_count  ?
_diffrn_standards_interval_time   ?
_diffrn_standards_decay_%         ?
_diffrn_reflns_number             43233
_diffrn_reflns_av_R_equivalents   0.0363
_diffrn_reflns_av_sigmaI/netI     0.0167
_diffrn_reflns_limit_h_min        -14
_diffrn_reflns_limit_h_max        14
_diffrn_reflns_limit_k_min        -11
_diffrn_reflns_limit_k_max        11
_diffrn_reflns_limit_l_min        -19
_diffrn_reflns_limit_l_max        19
_diffrn_reflns_theta_min          2.55
_diffrn_reflns_theta_max          25.68
_reflns_number_total              3398
_reflns_number_gt                 3122
_reflns_threshold_expression      >2sigma(I)

_computing_data_collection
;
CrysAlisPro, Agilent Technologies,
Version 1.171.34.49 (release 20-01-2011 CrysAlis171 .NET)
(compiled Jan 20 2011,15:58:25)
;
_computing_cell_refinement
;
CrysAlisPro, Agilent Technologies,
Version 1.171.34.49 (release 20-01-2011 CrysAlis171 .NET)
(compiled Jan 20 2011,15:58:25)
;
_computing_data_reduction
;
CrysAlisPro, Agilent Technologies,
Version 1.171.34.49 (release 20-01-2011 CrysAlis171 .NET)
(compiled Jan 20 2011,15:58:25)
;
_computing_structure_solution     'SHELXS-97 (Sheldrick, 1990)'
_computing_structure_refinement   'SHELXL-97 (Sheldrick, 1997)'
_computing_molecular_graphics     'BRUKER XP'
_computing_publication_material   'SHELXL-97'

_refine_special_details
;
 Refinement of F^2^ against ALL reflections.  The weighted R-factor wR and
 goodness of fit S are based on F^2^, conventional R-factors R are based
 on F, with F set to zero for negative F^2^. The threshold expression of
 F^2^ > 2sigma(F^2^) is used only for calculating R-factors(gt) etc. and is
 not relevant to the choice of reflections for refinement.  R-factors based
 on F^2^ are statistically about twice as large as those based on F, and R-
 factors based on ALL data will be even larger.

 The hydrogens of the C1 and C3 atoms were refined freely. The DFIX
 restraint was used in order to improve refinement stability.
;

_refine_ls_structure_factor_coef  Fsqd
_refine_ls_matrix_type            full
_refine_ls_weighting_scheme       calc
_refine_ls_weighting_details
 'calc w=1/[\s^2^(Fo^2^)+(0.0449P)^2^+4.5786P] where P=(Fo^2^+2Fc^2^)/3'
_atom_sites_solution_primary      direct
_atom_sites_solution_secondary    difmap
_atom_sites_solution_hydrogens    geom
_refine_ls_hydrogen_treatment     mixed
_refine_ls_extinction_method      none
_refine_ls_extinction_coef        ?
_refine_ls_number_reflns          3398
_refine_ls_number_parameters      217
_refine_ls_number_restraints      2
_refine_ls_R_factor_all           0.0520
_refine_ls_R_factor_gt            0.0475
_refine_ls_wR_factor_ref          0.1198
_refine_ls_wR_factor_gt           0.1173
_refine_ls_goodness_of_fit_ref    1.110
_refine_ls_restrained_S_all       1.112
_refine_ls_shift/su_max           0.000
_refine_ls_shift/su_mean          0.000

loop_
 _atom_site_label
 _atom_site_type_symbol
 _atom_site_fract_x
 _atom_site_fract_y
 _atom_site_fract_z
 _atom_site_U_iso_or_equiv
 _atom_site_adp_type
 _atom_site_occupancy
 _atom_site_symmetry_multiplicity
 _atom_site_calc_flag
 _atom_site_refinement_flags
 _atom_site_disorder_assembly
 _atom_site_disorder_group
Fe Fe 0.22984(4) 0.35253(5) 0.14645(3) 0.02070(15) Uani 1 1 d . . .
Cl Cl 0.31242(7) 0.42284(8) 0.27890(5) 0.0264(2) Uani 1 1 d . . .
C1 C 0.0571(3) 0.3926(4) 0.1486(3) 0.0368(9) Uani 1 1 d D . .
H1A H 0.038(4) 0.364(5) 0.1961(17) 0.045(12) Uiso 1 1 d D . .
H1B H 0.037(3) 0.335(4) 0.109(2) 0.044(12) Uiso 1 1 d D . .
C2 C 0.1170(3) 0.5174(4) 0.1463(2) 0.0352(8) Uani 1 1 d . . .
C3 C 0.1700(3) 0.5324(4) 0.0730(2) 0.0321(8) Uani 1 1 d . . .
H3 H 0.128(3) 0.486(4) 0.018(3) 0.039(11) Uiso 1 1 d . . .
C4 C 0.2382(3) 0.6575(4) 0.0534(2) 0.0319(8) Uani 1 1 d . . .
C5 C 0.2164(3) 0.7249(5) -0.0249(3) 0.0418(9) Uani 1 1 d . . .
H5 H 0.1586 0.6894 -0.0654 0.050 Uiso 1 1 calc R . .
C6 C 0.2773(3) 0.8430(5) -0.0453(3) 0.0453(10) Uani 1 1 d . . .
H6 H 0.2602 0.8890 -0.0987 0.054 Uiso 1 1 calc R . .
C7 C 0.3620(3) 0.8926(4) 0.0120(3) 0.0395(9) Uani 1 1 d . . .
H7 H 0.4035 0.9743 -0.0009 0.047 Uiso 1 1 calc R . .
C8 C 0.3869(3) 0.8239(4) 0.0884(2) 0.0375(9) Uani 1 1 d . . .
H8 H 0.4469 0.8575 0.1275 0.045 Uiso 1 1 calc R . .
C9 C 0.3265(3) 0.7070(4) 0.1096(2) 0.0340(8) Uani 1 1 d . . .
H9 H 0.3455 0.6605 0.1626 0.041 Uiso 1 1 calc R . .
C10 C 0.1189(4) 0.6318(4) 0.2147(3) 0.0437(10) Uani 1 1 d . . .
H10A H 0.1038 0.5868 0.2675 0.066 Uiso 1 1 calc R . .
H10B H 0.0627 0.7049 0.1971 0.066 Uiso 1 1 calc R . .
H10C H 0.1917 0.6777 0.2238 0.066 Uiso 1 1 calc R . .
C11 C 0.1950(3) 0.1307(4) 0.1098(2) 0.0303(8) Uani 1 1 d . . .
C12 C 0.2072(3) 0.2184(4) 0.0382(2) 0.0262(7) Uani 1 1 d . . .
C13 C 0.3171(3) 0.2753(4) 0.0495(2) 0.0250(7) Uani 1 1 d . . .
C14 C 0.3698(3) 0.2250(4) 0.1282(2) 0.0307(8) Uani 1 1 d . . .
C15 C 0.2937(3) 0.1363(4) 0.1658(2) 0.0322(8) Uani 1 1 d . . .
C16 C 0.0961(4) 0.0390(5) 0.1198(3) 0.0522(11) Uani 1 1 d . . .
H16A H 0.0881 0.0315 0.1800 0.078 Uiso 1 1 calc R . .
H16B H 0.1060 -0.0575 0.0970 0.078 Uiso 1 1 calc R . .
H16C H 0.0299 0.0834 0.0891 0.078 Uiso 1 1 calc R . .
C17 C 0.1270(3) 0.2284(5) -0.0407(2) 0.0417(9) Uani 1 1 d . . .
H17A H 0.1354 0.1443 -0.0765 0.062 Uiso 1 1 calc R . .
H17B H 0.1410 0.3166 -0.0714 0.062 Uiso 1 1 calc R . .
H17C H 0.0519 0.2307 -0.0261 0.062 Uiso 1 1 calc R . .
C18 C 0.3687(3) 0.3600(4) -0.0151(2) 0.0397(9) Uani 1 1 d . . .
H18A H 0.3972 0.2934 -0.0547 0.060 Uiso 1 1 calc R . .
H18B H 0.4293 0.4184 0.0134 0.060 Uiso 1 1 calc R . .
H18C H 0.3133 0.4234 -0.0462 0.060 Uiso 1 1 calc R . .
C19 C 0.4874(3) 0.2541(5) 0.1649(3) 0.0514(12) Uani 1 1 d . . .
H19A H 0.5168 0.3324 0.1333 0.077 Uiso 1 1 calc R . .
H19B H 0.5314 0.1667 0.1609 0.077 Uiso 1 1 calc R . .
H19C H 0.4905 0.2821 0.2244 0.077 Uiso 1 1 calc R . .
C20 C 0.3153(5) 0.0595(5) 0.2492(3) 0.0574(13) Uani 1 1 d . . .
H20A H 0.3226 -0.0443 0.2395 0.086 Uiso 1 1 calc R . .
H20B H 0.2538 0.0763 0.2814 0.086 Uiso 1 1 calc R . .
H20C H 0.3835 0.0962 0.2813 0.086 Uiso 1 1 calc R . .

loop_
 _atom_site_aniso_label
 _atom_site_aniso_U_11
 _atom_site_aniso_U_22
 _atom_site_aniso_U_33
 _atom_site_aniso_U_23
 _atom_site_aniso_U_13
 _atom_site_aniso_U_12
Fe 0.0213(2) 0.0193(2) 0.0214(3) -0.00162(17) 0.00270(17) -0.00044(17)
Cl 0.0352(4) 0.0216(4) 0.0213(4) -0.0081(3) -0.0002(3) 0.0053(3)
C1 0.0325(19) 0.034(2) 0.050(2) -0.0203(18) 0.0297(17) -0.0249(16)
C2 0.0258(17) 0.035(2) 0.044(2) 0.0023(17) 0.0052(15) 0.0059(15)
C3 0.0270(17) 0.0311(18) 0.037(2) 0.0019(15) -0.0002(15) 0.0030(14)
C4 0.0335(18) 0.0268(18) 0.039(2) -0.0004(15) 0.0165(15) 0.0046(14)
C5 0.0245(18) 0.061(3) 0.039(2) 0.0048(19) 0.0018(15) 0.0033(18)
C6 0.035(2) 0.057(3) 0.046(2) 0.029(2) 0.0122(18) 0.0133(19)
C7 0.041(2) 0.0250(18) 0.058(3) 0.0037(17) 0.0258(19) 0.0020(16)
C8 0.0323(19) 0.042(2) 0.039(2) -0.0088(17) 0.0104(16) -0.0007(16)
C9 0.0354(19) 0.0347(19) 0.0327(19) 0.0022(15) 0.0076(15) 0.0090(16)
C10 0.053(2) 0.031(2) 0.052(2) 0.0004(18) 0.026(2) 0.0128(18)
C11 0.0389(19) 0.0177(16) 0.0362(19) -0.0054(14) 0.0118(15) -0.0028(14)
C12 0.0271(16) 0.0236(16) 0.0273(17) -0.0071(13) 0.0012(13) -0.0012(13)
C13 0.0242(16) 0.0275(17) 0.0236(16) -0.0085(13) 0.0039(13) -0.0006(13)
C14 0.0283(17) 0.0318(19) 0.0299(18) -0.0124(15) -0.0029(14) 0.0096(14)
C15 0.049(2) 0.0224(17) 0.0252(17) -0.0051(14) 0.0036(15) 0.0109(15)
C16 0.060(3) 0.031(2) 0.071(3) -0.006(2) 0.027(2) -0.016(2)
C17 0.040(2) 0.042(2) 0.038(2) -0.0082(17) -0.0120(17) -0.0034(17)
C18 0.045(2) 0.040(2) 0.038(2) -0.0050(17) 0.0195(17) -0.0059(18)
C19 0.0268(19) 0.071(3) 0.052(3) -0.026(2) -0.0110(17) 0.015(2)
C20 0.104(4) 0.036(2) 0.031(2) 0.0007(18) 0.005(2) 0.030(2)

_geom_special_details
;
 All esds (except the esd in the dihedral angle between two l.s. planes)
 are estimated using the full covariance matrix.  The cell esds are taken
 into account individually in the estimation of esds in distances, angles
 and torsion angles; correlations between esds in cell parameters are only
 used when they are defined by crystal symmetry.  An approximate (isotropic)
 treatment of cell esds is used for estimating esds involving l.s. planes.
;

loop_
 _geom_bond_atom_site_label_1
 _geom_bond_atom_site_label_2
 _geom_bond_distance
 _geom_bond_site_symmetry_2
 _geom_bond_publ_flag
Fe C2 2.061(4) . ?
Fe C3 2.111(4) . ?
Fe C12 2.115(3) . ?
Fe C13 2.120(3) . ?
Fe C14 2.135(3) . ?
Fe C1 2.154(4) . ?
Fe C15 2.158(3) . ?
Fe C11 2.164(3) . ?
Fe Cl 2.3087(8) . ?
C1 C2 1.373(5) . ?
C2 C3 1.419(5) . ?
C2 C10 1.520(5) . ?
C3 C4 1.487(5) . ?
C4 C9 1.386(5) . ?
C4 C5 1.390(5) . ?
C5 C6 1.387(6) . ?
C6 C7 1.367(6) . ?
C7 C8 1.371(6) . ?
C8 C9 1.379(5) . ?
C11 C15 1.404(5) . ?
C11 C12 1.426(5) . ?
C11 C16 1.506(5) . ?
C12 C13 1.434(4) . ?
C12 C17 1.491(5) . ?
C13 C14 1.410(5) . ?
C13 C18 1.502(5) . ?
C14 C15 1.434(5) . ?
C14 C19 1.504(5) . ?
C15 C20 1.500(5) . ?

loop_
 _geom_angle_atom_site_label_1
 _geom_angle_atom_site_label_2
 _geom_angle_atom_site_label_3
 _geom_angle
 _geom_angle_site_symmetry_1
 _geom_angle_site_symmetry_3
 _geom_angle_publ_flag
C2 Fe C3 39.76(14) . . ?
C2 Fe C12 114.93(14) . . ?
C3 Fe C12 90.80(14) . . ?
C2 Fe C13 130.87(14) . . ?
C3 Fe C13 91.92(14) . . ?
C12 Fe C13 39.59(12) . . ?
C2 Fe C14 164.11(15) . . ?
C3 Fe C14 125.93(15) . . ?
C12 Fe C14 65.28(13) . . ?
C13 Fe C14 38.72(13) . . ?
C2 Fe C1 37.94(14) . . ?
C3 Fe C1 66.69(15) . . ?
C12 Fe C1 95.40(14) . . ?
C13 Fe C1 131.58(14) . . ?
C14 Fe C1 155.06(14) . . ?
C2 Fe C15 156.77(15) . . ?
C3 Fe C15 154.77(14) . . ?
C12 Fe C15 64.91(13) . . ?
C13 Fe C15 65.29(13) . . ?
C14 Fe C15 39.01(15) . . ?
C1 Fe C15 119.73(15) . . ?
C2 Fe C11 126.60(15) . . ?
C3 Fe C11 124.00(15) . . ?
C12 Fe C11 38.91(13) . . ?
C13 Fe C11 65.34(13) . . ?
C14 Fe C11 64.53(14) . . ?
C1 Fe C11 90.54(13) . . ?
C15 Fe C11 37.92(14) . . ?
C2 Fe Cl 90.13(11) . . ?
C3 Fe Cl 111.16(11) . . ?
C12 Fe Cl 154.87(9) . . ?
C13 Fe Cl 124.11(9) . . ?
C14 Fe Cl 91.19(9) . . ?
C1 Fe Cl 104.27(11) . . ?
C15 Fe Cl 91.47(9) . . ?
C11 Fe Cl 124.15(10) . . ?
C2 C1 Fe 67.4(2) . . ?
C1 C2 C3 114.2(3) . . ?
C1 C2 C10 121.7(3) . . ?
C3 C2 C10 124.0(3) . . ?
C1 C2 Fe 74.7(2) . . ?
C3 C2 Fe 72.0(2) . . ?
C10 C2 Fe 124.8(3) . . ?
C2 C3 C4 125.6(3) . . ?
C2 C3 Fe 68.2(2) . . ?
C4 C3 Fe 124.7(2) . . ?
C9 C4 C5 118.0(3) . . ?
C9 C4 C3 122.3(3) . . ?
C5 C4 C3 119.6(3) . . ?
C6 C5 C4 121.4(4) . . ?
C7 C6 C5 119.5(4) . . ?
C6 C7 C8 119.6(4) . . ?
C7 C8 C9 121.3(4) . . ?
C8 C9 C4 120.0(4) . . ?
C15 C11 C12 108.3(3) . . ?
C15 C11 C16 126.1(4) . . ?
C12 C11 C16 125.5(4) . . ?
C15 C11 Fe 70.83(19) . . ?
C12 C11 Fe 68.70(18) . . ?
C16 C11 Fe 129.7(3) . . ?
C11 C12 C13 107.9(3) . . ?
C11 C12 C17 125.6(3) . . ?
C13 C12 C17 125.7(3) . . ?
C11 C12 Fe 72.39(19) . . ?
C13 C12 Fe 70.38(18) . . ?
C17 C12 Fe 130.6(3) . . ?
C14 C13 C12 107.4(3) . . ?
C14 C13 C18 126.8(3) . . ?
C12 C13 C18 125.5(3) . . ?
C14 C13 Fe 71.22(19) . . ?
C12 C13 Fe 70.03(18) . . ?
C18 C13 Fe 128.7(2) . . ?
C13 C14 C15 108.5(3) . . ?
C13 C14 C19 125.8(4) . . ?
C15 C14 C19 125.7(4) . . ?
C13 C14 Fe 70.07(18) . . ?
C15 C14 Fe 71.39(19) . . ?
C19 C14 Fe 126.3(3) . . ?
C11 C15 C14 107.9(3) . . ?
C11 C15 C20 125.4(4) . . ?
C14 C15 C20 126.7(4) . . ?
C11 C15 Fe 71.24(19) . . ?
C14 C15 Fe 69.60(19) . . ?
C20 C15 Fe 125.7(2) . . ?

loop_
 _geom_torsion_atom_site_label_1
 _geom_torsion_atom_site_label_2
 _geom_torsion_atom_site_label_3
 _geom_torsion_atom_site_label_4
 _geom_torsion
 _geom_torsion_site_symmetry_1
 _geom_torsion_site_symmetry_2
 _geom_torsion_site_symmetry_3
 _geom_torsion_site_symmetry_4
 _geom_torsion_publ_flag
C3 Fe C1 C2 -36.0(2) . . . . ?
C12 Fe C1 C2 -124.6(2) . . . . ?
C13 Fe C1 C2 -106.5(3) . . . . ?
C14 Fe C1 C2 -162.1(3) . . . . ?
C15 Fe C1 C2 171.3(2) . . . . ?
C11 Fe C1 C2 -163.2(2) . . . . ?
Cl Fe C1 C2 71.2(2) . . . . ?
Fe C1 C2 C3 61.7(3) . . . . ?
Fe C1 C2 C10 -121.8(4) . . . . ?
C3 Fe C2 C1 122.4(3) . . . . ?
C12 Fe C2 C1 64.7(3) . . . . ?
C13 Fe C2 C1 108.5(3) . . . . ?
C14 Fe C2 C1 151.7(5) . . . . ?
C15 Fe C2 C1 -19.4(5) . . . . ?
C11 Fe C2 C1 21.1(3) . . . . ?
Cl Fe C2 C1 -113.4(2) . . . . ?
C12 Fe C2 C3 -57.7(2) . . . . ?
C13 Fe C2 C3 -13.9(3) . . . . ?
C14 Fe C2 C3 29.4(6) . . . . ?
C1 Fe C2 C3 -122.4(3) . . . . ?
C15 Fe C2 C3 -141.8(3) . . . . ?
C11 Fe C2 C3 -101.3(2) . . . . ?
Cl Fe C2 C3 124.2(2) . . . . ?
C3 Fe C2 C10 -119.4(4) . . . . ?
C12 Fe C2 C10 -177.0(3) . . . . ?
C13 Fe C2 C10 -133.2(3) . . . . ?
C14 Fe C2 C10 -90.0(6) . . . . ?
C1 Fe C2 C10 118.3(4) . . . . ?
C15 Fe C2 C10 98.9(4) . . . . ?
C11 Fe C2 C10 139.3(3) . . . . ?
Cl Fe C2 C10 4.8(3) . . . . ?
C1 C2 C3 C4 178.9(4) . . . . ?
C10 C2 C3 C4 2.5(6) . . . . ?
Fe C2 C3 C4 -117.9(3) . . . . ?
C1 C2 C3 Fe -63.2(3) . . . . ?
C10 C2 C3 Fe 120.4(4) . . . . ?
C12 Fe C3 C2 130.0(2) . . . . ?
C13 Fe C3 C2 169.5(2) . . . . ?
C14 Fe C3 C2 -170.5(2) . . . . ?
C1 Fe C3 C2 34.4(2) . . . . ?
C15 Fe C3 C2 145.1(3) . . . . ?
C11 Fe C3 C2 108.3(2) . . . . ?
Cl Fe C3 C2 -62.5(2) . . . . ?
C2 Fe C3 C4 119.1(4) . . . . ?
C12 Fe C3 C4 -110.9(3) . . . . ?
C13 Fe C3 C4 -71.3(3) . . . . ?
C14 Fe C3 C4 -51.3(4) . . . . ?
C1 Fe C3 C4 153.5(4) . . . . ?
C15 Fe C3 C4 -95.8(4) . . . . ?
C11 Fe C3 C4 -132.6(3) . . . . ?
Cl Fe C3 C4 56.6(3) . . . . ?
C2 C3 C4 C9 53.7(5) . . . . ?
Fe C3 C4 C9 -32.9(5) . . . . ?
C2 C3 C4 C5 -128.8(4) . . . . ?
Fe C3 C4 C5 144.5(3) . . . . ?
C9 C4 C5 C6 -3.2(6) . . . . ?
C3 C4 C5 C6 179.2(4) . . . . ?
C4 C5 C6 C7 1.4(6) . . . . ?
C5 C6 C7 C8 1.0(6) . . . . ?
C6 C7 C8 C9 -1.4(6) . . . . ?
C7 C8 C9 C4 -0.5(6) . . . . ?
C5 C4 C9 C8 2.7(5) . . . . ?
C3 C4 C9 C8 -179.7(3) . . . . ?
C2 Fe C11 C15 -155.4(2) . . . . ?
C3 Fe C11 C15 155.5(2) . . . . ?
C12 Fe C11 C15 119.4(3) . . . . ?
C13 Fe C11 C15 80.8(2) . . . . ?
C14 Fe C11 C15 37.9(2) . . . . ?
C1 Fe C11 C15 -142.6(2) . . . . ?
Cl Fe C11 C15 -34.9(2) . . . . ?
C2 Fe C11 C12 85.2(2) . . . . ?
C3 Fe C11 C12 36.0(3) . . . . ?
C13 Fe C11 C12 -38.61(19) . . . . ?
C14 Fe C11 C12 -81.5(2) . . . . ?
C1 Fe C11 C12 97.9(2) . . . . ?
C15 Fe C11 C12 -119.4(3) . . . . ?
Cl Fe C11 C12 -154.35(16) . . . . ?
C2 Fe C11 C16 -33.9(4) . . . . ?
C3 Fe C11 C16 -83.1(4) . . . . ?
C12 Fe C11 C16 -119.1(5) . . . . ?
C13 Fe C11 C16 -157.7(4) . . . . ?
C14 Fe C11 C16 159.4(4) . . . . ?
C1 Fe C11 C16 -21.2(4) . . . . ?
C15 Fe C11 C16 121.5(5) . . . . ?
Cl Fe C11 C16 86.5(4) . . . . ?
C15 C11 C12 C13 1.8(4) . . . . ?
C16 C11 C12 C13 -173.8(3) . . . . ?
Fe C11 C12 C13 61.8(2) . . . . ?
C15 C11 C12 C17 172.2(3) . . . . ?
C16 C11 C12 C17 -3.4(6) . . . . ?
Fe C11 C12 C17 -127.8(4) . . . . ?
C15 C11 C12 Fe -60.0(2) . . . . ?
C16 C11 C12 Fe 124.4(4) . . . . ?
C2 Fe C12 C11 -118.1(2) . . . . ?
C3 Fe C12 C11 -150.8(2) . . . . ?
C13 Fe C12 C11 117.1(3) . . . . ?
C14 Fe C12 C11 79.4(2) . . . . ?
C1 Fe C12 C11 -84.2(2) . . . . ?
C15 Fe C12 C11 36.2(2) . . . . ?
Cl Fe C12 C11 57.5(3) . . . . ?
C2 Fe C12 C13 124.8(2) . . . . ?
C3 Fe C12 C13 92.1(2) . . . . ?
C14 Fe C12 C13 -37.7(2) . . . . ?
C1 Fe C12 C13 158.7(2) . . . . ?
C15 Fe C12 C13 -80.9(2) . . . . ?
C11 Fe C12 C13 -117.1(3) . . . . ?
Cl Fe C12 C13 -59.6(3) . . . . ?
C2 Fe C12 C17 4.1(4) . . . . ?
C3 Fe C12 C17 -28.6(4) . . . . ?
C13 Fe C12 C17 -120.7(4) . . . . ?
C14 Fe C12 C17 -158.4(4) . . . . ?
C1 Fe C12 C17 38.0(4) . . . . ?
C15 Fe C12 C17 158.4(4) . . . . ?
C11 Fe C12 C17 122.2(4) . . . . ?
Cl Fe C12 C17 179.7(2) . . . . ?
C11 C12 C13 C14 -1.3(4) . . . . ?
C17 C12 C13 C14 -171.7(3) . . . . ?
Fe C12 C13 C14 61.8(2) . . . . ?
C11 C12 C13 C18 173.0(3) . . . . ?
C17 C12 C13 C18 2.6(5) . . . . ?
Fe C12 C13 C18 -123.9(3) . . . . ?
C11 C12 C13 Fe -63.1(2) . . . . ?
C17 C12 C13 Fe 126.5(4) . . . . ?
C2 Fe C13 C14 162.6(2) . . . . ?
C3 Fe C13 C14 153.7(2) . . . . ?
C12 Fe C13 C14 -117.3(3) . . . . ?
C1 Fe C13 C14 -146.2(2) . . . . ?
C15 Fe C13 C14 -37.5(2) . . . . ?
C11 Fe C13 C14 -79.4(2) . . . . ?
Cl Fe C13 C14 36.4(2) . . . . ?
C2 Fe C13 C12 -80.1(3) . . . . ?
C3 Fe C13 C12 -88.9(2) . . . . ?
C14 Fe C13 C12 117.3(3) . . . . ?
C1 Fe C13 C12 -28.9(3) . . . . ?
C15 Fe C13 C12 79.9(2) . . . . ?
C11 Fe C13 C12 38.0(2) . . . . ?
Cl Fe C13 C12 153.75(16) . . . . ?
C2 Fe C13 C18 40.0(4) . . . . ?
C3 Fe C13 C18 31.2(3) . . . . ?
C12 Fe C13 C18 120.1(4) . . . . ?
C14 Fe C13 C18 -122.6(4) . . . . ?
C1 Fe C13 C18 91.2(3) . . . . ?
C15 Fe C13 C18 -160.1(4) . . . . ?
C11 Fe C13 C18 158.0(4) . . . . ?
Cl Fe C13 C18 -86.2(3) . . . . ?
C12 C13 C14 C15 0.3(4) . . . . ?
C18 C13 C14 C15 -173.8(3) . . . . ?
Fe C13 C14 C15 61.4(2) . . . . ?
C12 C13 C14 C19 178.0(3) . . . . ?
C18 C13 C14 C19 3.8(6) . . . . ?
Fe C13 C14 C19 -121.0(4) . . . . ?
C12 C13 C14 Fe -61.0(2) . . . . ?
C18 C13 C14 Fe 124.8(3) . . . . ?
C2 Fe C14 C13 -55.9(6) . . . . ?
C3 Fe C14 C13 -33.1(3) . . . . ?
C12 Fe C14 C13 38.54(19) . . . . ?
C1 Fe C14 C13 80.4(4) . . . . ?
C15 Fe C14 C13 118.6(3) . . . . ?
C11 Fe C14 C13 81.7(2) . . . . ?
Cl Fe C14 C13 -150.56(19) . . . . ?
C2 Fe C14 C15 -174.5(5) . . . . ?
C3 Fe C14 C15 -151.7(2) . . . . ?
C12 Fe C14 C15 -80.0(2) . . . . ?
C13 Fe C14 C15 -118.6(3) . . . . ?
C1 Fe C14 C15 -38.1(4) . . . . ?
C11 Fe C14 C15 -36.9(2) . . . . ?
Cl Fe C14 C15 90.88(18) . . . . ?
C2 Fe C14 C19 64.5(7) . . . . ?
C3 Fe C14 C19 87.3(4) . . . . ?
C12 Fe C14 C19 158.9(4) . . . . ?
C13 Fe C14 C19 120.4(5) . . . . ?
C1 Fe C14 C19 -159.2(4) . . . . ?
C15 Fe C14 C19 -121.0(4) . . . . ?
C11 Fe C14 C19 -157.9(4) . . . . ?
Cl Fe C14 C19 -30.2(4) . . . . ?
C12 C11 C15 C14 -1.5(4) . . . . ?
C16 C11 C15 C14 174.0(3) . . . . ?
Fe C11 C15 C14 -60.2(2) . . . . ?
C12 C11 C15 C20 179.7(3) . . . . ?
C16 C11 C15 C20 -4.7(6) . . . . ?
Fe C11 C15 C20 121.0(3) . . . . ?
C12 C11 C15 Fe 58.7(2) . . . . ?
C16 C11 C15 Fe -125.7(4) . . . . ?
C13 C14 C15 C11 0.7(4) . . . . ?
C19 C14 C15 C11 -176.9(3) . . . . ?
Fe C14 C15 C11 61.3(2) . . . . ?
C13 C14 C15 C20 179.5(3) . . . . ?
C19 C14 C15 C20 1.8(6) . . . . ?
Fe C14 C15 C20 -120.0(4) . . . . ?
C13 C14 C15 Fe -60.5(2) . . . . ?
C19 C14 C15 Fe 121.9(4) . . . . ?
C2 Fe C15 C11 57.9(4) . . . . ?
C3 Fe C15 C11 -53.9(4) . . . . ?
C12 Fe C15 C11 -37.2(2) . . . . ?
C13 Fe C15 C11 -81.0(2) . . . . ?
C14 Fe C15 C11 -118.2(3) . . . . ?
C1 Fe C15 C11 44.3(3) . . . . ?
Cl Fe C15 C11 151.7(2) . . . . ?
C2 Fe C15 C14 176.2(3) . . . . ?
C3 Fe C15 C14 64.3(4) . . . . ?
C12 Fe C15 C14 81.1(2) . . . . ?
C13 Fe C15 C14 37.21(19) . . . . ?
C1 Fe C15 C14 162.6(2) . . . . ?
C11 Fe C15 C14 118.2(3) . . . . ?
Cl Fe C15 C14 -90.07(18) . . . . ?
C2 Fe C15 C20 -62.7(6) . . . . ?
C3 Fe C15 C20 -174.5(4) . . . . ?
C12 Fe C15 C20 -157.8(4) . . . . ?
C13 Fe C15 C20 158.4(4) . . . . ?
C14 Fe C15 C20 121.1(5) . . . . ?
C1 Fe C15 C20 -76.3(4) . . . . ?
C11 Fe C15 C20 -120.6(5) . . . . ?
Cl Fe C15 C20 31.1(4) . . . . ?

_diffrn_measured_fraction_theta_max    0.998
_diffrn_reflns_theta_full              25.68
_diffrn_measured_fraction_theta_full   0.998
_refine_diff_density_max    0.914
_refine_diff_density_min   -0.423
_refine_diff_density_rms    0.076


#=============================================================================
#  end of cif data for "andyg71" (compound syn-7)
#=============================================================================

#=============================================================================
#  cif data for "andyg81" (compound syn-9)
#=============================================================================

data_andyg81

_audit_creation_method            SHELXL-97
_chemical_name_systematic
;
 ?
;
_chemical_name_common             ?
_chemical_melting_point           ?
_chemical_formula_moiety          ?
_chemical_formula_sum
 'C28 H34 Fe O'
_chemical_formula_weight          442.40

loop_
 _atom_type_symbol
 _atom_type_description
 _atom_type_scat_dispersion_real
 _atom_type_scat_dispersion_imag
 _atom_type_scat_source
 'C'  'C'   0.0181   0.0091
 'International Tables Vol C Tables 4.2.6.8 and 6.1.1.4'
 'H'  'H'   0.0000   0.0000
 'International Tables Vol C Tables 4.2.6.8 and 6.1.1.4'
 'O'  'O'   0.0492   0.0322
 'International Tables Vol C Tables 4.2.6.8 and 6.1.1.4'
 'Fe'  'Fe'  -1.1336   3.1974
 'International Tables Vol C Tables 4.2.6.8 and 6.1.1.4'

_symmetry_cell_setting            monoclinic
_symmetry_space_group_name_H-M    'P 21/c'

loop_
 _symmetry_equiv_pos_as_xyz
 'x, y, z'
 '-x, y+1/2, -z+1/2'
 '-x, -y, -z'
 'x, -y-1/2, z-1/2'

_cell_length_a                    14.1221(4)
_cell_length_b                    9.8383(3)
_cell_length_c                    17.0165(5)
_cell_angle_alpha                 90.00
_cell_angle_beta                  98.689(3)
_cell_angle_gamma                 90.00
_cell_volume                      2337.10(12)
_cell_formula_units_Z             4
_cell_measurement_temperature     100(2)
_cell_measurement_reflns_used     20437
_cell_measurement_theta_min       3.7939
_cell_measurement_theta_max       75.6011

_exptl_crystal_description        prism
_exptl_crystal_colour             red
_exptl_crystal_size_max           0.20
_exptl_crystal_size_mid           0.05
_exptl_crystal_size_min           0.05
_exptl_crystal_density_meas       ?
_exptl_crystal_density_diffrn     1.257
_exptl_crystal_density_method     'not measured'
_exptl_crystal_F_000              944
_exptl_absorpt_coefficient_mu     5.279
_exptl_absorpt_correction_type    multi-scan
_exptl_absorpt_correction_T_min   0.04693
_exptl_absorpt_correction_T_max   1.00000
_exptl_absorpt_process_details
;
CrysAlisPro, Oxford Diffraction Ltd.,
Version 1.171.35.15 (release 03-08-2011 CrysAlis171 .NET)
(compiled Aug  3 2011,13:03:54)
;

_exptl_special_details
;
 ?
;

_diffrn_ambient_temperature       100(2)
_diffrn_radiation_wavelength      1.54184
_diffrn_radiation_type            CuK\a
_diffrn_radiation_source          'Nova (Cu) X-ray Source'
_diffrn_radiation_monochromator   mirror
_diffrn_measurement_device_type   'Oxford Diffraction Xcalibur, Atlas, Nova'
_diffrn_measurement_method        '\w scans'
_diffrn_detector_area_resol_mean  10.3543
_diffrn_standards_number          ?
_diffrn_standards_interval_count  ?
_diffrn_standards_interval_time   ?
_diffrn_standards_decay_%         ?
_diffrn_reflns_number             63517
_diffrn_reflns_av_R_equivalents   0.0715
_diffrn_reflns_av_sigmaI/netI     0.0254
_diffrn_reflns_limit_h_min        -17
_diffrn_reflns_limit_h_max        17
_diffrn_reflns_limit_k_min        -12
_diffrn_reflns_limit_k_max        10
_diffrn_reflns_limit_l_min        -21
_diffrn_reflns_limit_l_max        21
_diffrn_reflns_theta_min          5.21
_diffrn_reflns_theta_max          75.78
_reflns_number_total              4878
_reflns_number_gt                 4334
_reflns_threshold_expression      >2sigma(I)

_computing_data_collection
;
CrysAlisPro, Oxford Diffraction Ltd.,
Version 1.171.35.15 (release 03-08-2011 CrysAlis171 .NET)
(compiled Aug  3 2011,13:03:54)
;
_computing_cell_refinement
;
CrysAlisPro, Oxford Diffraction Ltd.,
Version 1.171.35.15 (release 03-08-2011 CrysAlis171 .NET)
(compiled Aug  3 2011,13:03:54)
;
_computing_data_reduction
;
CrysAlisPro, Oxford Diffraction Ltd.,
Version 1.171.35.15 (release 03-08-2011 CrysAlis171 .NET)
(compiled Aug  3 2011,13:03:54)
;
_computing_structure_solution     'SHELXS-97 (Sheldrick, 1990)'
_computing_structure_refinement   'SHELXL-97 (Sheldrick, 1997)'
_computing_molecular_graphics     'Bruker XP'
_computing_publication_material   SHELXL-97

_refine_special_details
;
 Refinement of F^2^ against ALL reflections.  The weighted R-factor wR and
 goodness of fit S are based on F^2^, conventional R-factors R are based
 on F, with F set to zero for negative F^2^. The threshold expression of
 F^2^ > 2sigma(F^2^) is used only for calculating R-factors(gt) etc. and is
 not relevant to the choice of reflections for refinement.  R-factors based
 on F^2^ are statistically about twice as large as those based on F, and R-
 factors based on ALL data will be even larger.

Hydrogen atoms at C1, C3 amd C12 were refined freely. Methyl groups were
refined as idealized rigid groups allowed to rotate but not tip.
Other hydrogens were included using a riding model starting from calculated
positions.
;

_refine_ls_structure_factor_coef  Fsqd
_refine_ls_matrix_type            full
_refine_ls_weighting_scheme       calc
_refine_ls_weighting_details
 'calc w=1/[\s^2^(Fo^2^)+(0.0361P)^2^+0.8872P] where P=(Fo^2^+2Fc^2^)/3'
_atom_sites_solution_primary      direct
_atom_sites_solution_secondary    difmap
_atom_sites_solution_hydrogens    geom
_refine_ls_hydrogen_treatment     mixed
_refine_ls_extinction_method      none
_refine_ls_extinction_coef        ?
_refine_ls_number_reflns          4878
_refine_ls_number_parameters      294
_refine_ls_number_restraints      0
_refine_ls_R_factor_all           0.0386
_refine_ls_R_factor_gt            0.0321
_refine_ls_wR_factor_ref          0.0789
_refine_ls_wR_factor_gt           0.0757
_refine_ls_goodness_of_fit_ref    1.062
_refine_ls_restrained_S_all       1.062
_refine_ls_shift/su_max           0.001
_refine_ls_shift/su_mean          0.000

loop_
 _atom_site_label
 _atom_site_type_symbol
 _atom_site_fract_x
 _atom_site_fract_y
 _atom_site_fract_z
 _atom_site_U_iso_or_equiv
 _atom_site_adp_type
 _atom_site_occupancy
 _atom_site_symmetry_multiplicity
 _atom_site_calc_flag
 _atom_site_refinement_flags
 _atom_site_disorder_assembly
 _atom_site_disorder_group
Fe Fe 0.725741(16) 0.77279(2) 0.749185(13) 0.01707(8) Uani 1 1 d . . .
O O 0.87419(10) 0.89535(16) 0.86218(7) 0.0380(3) Uani 1 1 d . . .
C1 C 0.59994(12) 0.8182(2) 0.79539(10) 0.0261(4) Uani 1 1 d . . .
H1A H 0.5496(16) 0.784(2) 0.7531(13) 0.032(5) Uiso 1 1 d . . .
H1B H 0.5872(14) 0.907(2) 0.8167(12) 0.029(5) Uiso 1 1 d . . .
C2 C 0.65535(11) 0.72479(18) 0.84572(9) 0.0224(3) Uani 1 1 d . . .
C3 C 0.68008(12) 0.60153(18) 0.81047(9) 0.0227(3) Uani 1 1 d . . .
H3 H 0.6314(13) 0.569(2) 0.7666(11) 0.021(5) Uiso 1 1 d . . .
C4 C 0.73858(12) 0.49105(18) 0.85177(9) 0.0249(3) Uani 1 1 d . . .
C5 C 0.70464(13) 0.35752(19) 0.84112(10) 0.0293(4) Uani 1 1 d . . .
H5 H 0.6462 0.3409 0.8068 0.035 Uiso 1 1 calc R . .
C6 C 0.75453(16) 0.2488(2) 0.87968(13) 0.0365(4) Uani 1 1 d . . .
H6 H 0.7301 0.1592 0.8714 0.044 Uiso 1 1 calc R . .
C7 C 0.83940(16) 0.2705(2) 0.92991(13) 0.0406(5) Uani 1 1 d . . .
H7 H 0.8729 0.1965 0.9572 0.049 Uiso 1 1 calc R . .
C8 C 0.87522(15) 0.4016(2) 0.94006(13) 0.0396(5) Uani 1 1 d . . .
H8 H 0.9338 0.4171 0.9743 0.048 Uiso 1 1 calc R . .
C9 C 0.82668(13) 0.5104(2) 0.90088(11) 0.0319(4) Uani 1 1 d . . .
H9 H 0.8534 0.5990 0.9074 0.038 Uiso 1 1 calc R . .
C10 C 0.68785(13) 0.76492(19) 0.93128(10) 0.0278(4) Uani 1 1 d . . .
H10A H 0.6991 0.8632 0.9344 0.042 Uiso 1 1 calc R . .
H10B H 0.7473 0.7168 0.9516 0.042 Uiso 1 1 calc R . .
H10C H 0.6382 0.7408 0.9633 0.042 Uiso 1 1 calc R . .
C11 C 0.70292(11) 0.89563(16) 0.64673(8) 0.0189(3) Uani 1 1 d . . .
C12 C 0.79865(11) 0.84410(16) 0.66151(9) 0.0184(3) Uani 1 1 d . . .
H12 H 0.8548(13) 0.8977(19) 0.6727(11) 0.018(4) Uiso 1 1 d . . .
C13 C 0.80054(11) 0.69868(16) 0.65832(9) 0.0183(3) Uani 1 1 d . . .
C14 C 0.70253(11) 0.65788(16) 0.63415(8) 0.0181(3) Uani 1 1 d . . .
C15 C 0.64312(11) 0.77824(16) 0.62737(8) 0.0184(3) Uani 1 1 d . . .
C16 C 0.54190(11) 0.76382(18) 0.60427(9) 0.0221(3) Uani 1 1 d . . .
H16 H 0.5018 0.8419 0.5992 0.027 Uiso 1 1 calc R . .
C17 C 0.50327(12) 0.63798(19) 0.58964(9) 0.0255(4) Uani 1 1 d . . .
H17 H 0.4359 0.6289 0.5751 0.031 Uiso 1 1 calc R . .
C18 C 0.56203(12) 0.51971(18) 0.59575(9) 0.0251(3) Uani 1 1 d . . .
H18 H 0.5333 0.4331 0.5848 0.030 Uiso 1 1 calc R . .
C19 C 0.65878(12) 0.52849(17) 0.61703(9) 0.0222(3) Uani 1 1 d . . .
H19 H 0.6970 0.4486 0.6204 0.027 Uiso 1 1 calc R . .
C20 C 0.67677(12) 1.04484(17) 0.63449(9) 0.0225(3) Uani 1 1 d . . .
C21 C 0.76395(13) 1.13424(18) 0.66322(12) 0.0315(4) Uani 1 1 d . . .
H21A H 0.7881 1.1132 0.7189 0.047 Uiso 1 1 calc R . .
H21B H 0.7453 1.2302 0.6585 0.047 Uiso 1 1 calc R . .
H21C H 0.8142 1.1165 0.6306 0.047 Uiso 1 1 calc R . .
C22 C 0.64702(13) 1.06855(19) 0.54477(10) 0.0291(4) Uani 1 1 d . . .
H22A H 0.6999 1.0431 0.5165 0.044 Uiso 1 1 calc R . .
H22B H 0.6315 1.1648 0.5351 0.044 Uiso 1 1 calc R . .
H22C H 0.5907 1.0129 0.5255 0.044 Uiso 1 1 calc R . .
C23 C 0.59489(13) 1.09022(19) 0.67841(11) 0.0314(4) Uani 1 1 d . . .
H23A H 0.5390 1.0317 0.6630 0.047 Uiso 1 1 calc R . .
H23B H 0.5778 1.1846 0.6644 0.047 Uiso 1 1 calc R . .
H23C H 0.6156 1.0833 0.7359 0.047 Uiso 1 1 calc R . .
C24 C 0.89141(11) 0.61487(17) 0.65834(9) 0.0216(3) Uani 1 1 d . . .
C25 C 0.90640(15) 0.5976(3) 0.57177(11) 0.0484(6) Uani 1 1 d . . .
H25A H 0.9661 0.5477 0.5698 0.073 Uiso 1 1 calc R . .
H25B H 0.9102 0.6872 0.5473 0.073 Uiso 1 1 calc R . .
H25C H 0.8525 0.5467 0.5427 0.073 Uiso 1 1 calc R . .
C26 C 0.88780(16) 0.4771(2) 0.69721(19) 0.0601(8) Uani 1 1 d . . .
H26A H 0.9498 0.4317 0.6990 0.090 Uiso 1 1 calc R . .
H26B H 0.8377 0.4218 0.6664 0.090 Uiso 1 1 calc R . .
H26C H 0.8735 0.4887 0.7514 0.090 Uiso 1 1 calc R . .
C27 C 0.97822(14) 0.6894(2) 0.70213(14) 0.0446(5) Uani 1 1 d . . .
H27A H 0.9698 0.7034 0.7577 0.067 Uiso 1 1 calc R . .
H27B H 0.9847 0.7777 0.6768 0.067 Uiso 1 1 calc R . .
H27C H 1.0360 0.6352 0.7001 0.067 Uiso 1 1 calc R . .
C28 C 0.81334(12) 0.84413(18) 0.81832(9) 0.0248(3) Uani 1 1 d . . .

loop_
 _atom_site_aniso_label
 _atom_site_aniso_U_11
 _atom_site_aniso_U_22
 _atom_site_aniso_U_33
 _atom_site_aniso_U_23
 _atom_site_aniso_U_13
 _atom_site_aniso_U_12
Fe 0.01686(12) 0.01943(13) 0.01526(12) -0.00042(9) 0.00351(8) -0.00072(9)
O 0.0372(7) 0.0496(9) 0.0264(6) -0.0068(6) 0.0022(5) -0.0213(6)
C1 0.0216(8) 0.0363(10) 0.0225(8) 0.0008(7) 0.0096(7) 0.0034(7)
C2 0.0210(7) 0.0291(9) 0.0186(7) 0.0015(6) 0.0081(6) -0.0039(6)
C3 0.0227(8) 0.0269(9) 0.0191(7) 0.0002(6) 0.0054(6) -0.0071(7)
C4 0.0271(8) 0.0285(9) 0.0211(7) 0.0006(6) 0.0100(6) -0.0024(7)
C5 0.0347(9) 0.0280(9) 0.0281(8) -0.0014(7) 0.0146(7) -0.0031(7)
C6 0.0458(11) 0.0249(9) 0.0442(11) 0.0013(8) 0.0239(9) 0.0006(8)
C7 0.0416(11) 0.0360(11) 0.0487(12) 0.0137(9) 0.0207(9) 0.0131(9)
C8 0.0322(10) 0.0438(12) 0.0428(11) 0.0092(9) 0.0055(8) 0.0062(9)
C9 0.0309(9) 0.0308(10) 0.0342(9) 0.0031(8) 0.0064(7) -0.0013(7)
C10 0.0331(9) 0.0324(10) 0.0186(8) -0.0013(7) 0.0061(7) -0.0017(7)
C11 0.0204(7) 0.0212(8) 0.0158(7) 0.0017(6) 0.0046(6) 0.0018(6)
C12 0.0177(7) 0.0206(8) 0.0176(7) 0.0006(6) 0.0052(6) -0.0007(6)
C13 0.0188(7) 0.0214(8) 0.0153(7) -0.0007(6) 0.0046(5) 0.0006(6)
C14 0.0199(7) 0.0223(8) 0.0127(6) -0.0012(6) 0.0039(5) -0.0001(6)
C15 0.0203(7) 0.0218(8) 0.0133(6) 0.0005(6) 0.0037(5) 0.0005(6)
C16 0.0190(7) 0.0292(9) 0.0183(7) -0.0002(6) 0.0033(6) 0.0034(6)
C17 0.0193(8) 0.0365(10) 0.0206(7) -0.0020(7) 0.0026(6) -0.0045(7)
C18 0.0288(8) 0.0259(9) 0.0208(7) -0.0033(6) 0.0045(6) -0.0080(7)
C19 0.0271(8) 0.0207(8) 0.0197(7) -0.0005(6) 0.0061(6) 0.0002(6)
C20 0.0247(8) 0.0185(8) 0.0248(8) 0.0010(6) 0.0049(6) 0.0022(6)
C21 0.0333(9) 0.0190(8) 0.0413(10) 0.0001(7) 0.0022(8) -0.0005(7)
C22 0.0349(9) 0.0245(9) 0.0281(8) 0.0070(7) 0.0052(7) 0.0053(7)
C23 0.0344(9) 0.0240(9) 0.0376(10) 0.0001(7) 0.0119(8) 0.0079(7)
C24 0.0190(7) 0.0234(8) 0.0229(7) 0.0009(6) 0.0043(6) 0.0035(6)
C25 0.0376(11) 0.0813(18) 0.0266(9) -0.0060(10) 0.0063(8) 0.0332(11)
C26 0.0355(11) 0.0373(13) 0.114(2) 0.0379(14) 0.0325(13) 0.0185(10)
C27 0.0223(9) 0.0458(12) 0.0616(14) -0.0199(11) -0.0065(9) 0.0091(8)
C28 0.0286(8) 0.0268(9) 0.0204(7) 0.0015(6) 0.0082(6) -0.0029(7)

_geom_special_details
;
 All esds (except the esd in the dihedral angle between two l.s. planes)
 are estimated using the full covariance matrix.  The cell esds are taken
 into account individually in the estimation of esds in distances, angles
 and torsion angles; correlations between esds in cell parameters are only
 used when they are defined by crystal symmetry.  An approximate (isotropic)
 treatment of cell esds is used for estimating esds involving l.s. planes.
;

loop_
 _geom_bond_atom_site_label_1
 _geom_bond_atom_site_label_2
 _geom_bond_distance
 _geom_bond_site_symmetry_2
 _geom_bond_publ_flag
Fe C28 1.7226(17) . ?
Fe C12 2.0596(15) . ?
Fe C1 2.0967(16) . ?
Fe C2 2.0984(15) . ?
Fe C11 2.1057(15) . ?
Fe C13 2.1288(15) . ?
Fe C3 2.1321(16) . ?
Fe C15 2.2204(15) . ?
Fe C14 2.2413(15) . ?
O C28 1.164(2) . ?
C1 C2 1.410(2) . ?
C2 C3 1.420(2) . ?
C2 C10 1.511(2) . ?
C3 C4 1.477(2) . ?
C4 C5 1.401(3) . ?
C4 C9 1.403(3) . ?
C5 C6 1.390(3) . ?
C6 C7 1.379(3) . ?
C7 C8 1.387(3) . ?
C8 C9 1.386(3) . ?
C11 C12 1.430(2) . ?
C11 C15 1.439(2) . ?
C11 C20 1.520(2) . ?
C12 C13 1.432(2) . ?
C13 C14 1.440(2) . ?
C13 C24 1.525(2) . ?
C14 C19 1.426(2) . ?
C14 C15 1.446(2) . ?
C15 C16 1.431(2) . ?
C16 C17 1.361(3) . ?
C17 C18 1.424(3) . ?
C18 C19 1.362(2) . ?
C20 C21 1.532(2) . ?
C20 C23 1.535(2) . ?
C20 C22 1.539(2) . ?
C24 C26 1.512(3) . ?
C24 C27 1.523(3) . ?
C24 C25 1.529(2) . ?

loop_
 _geom_angle_atom_site_label_1
 _geom_angle_atom_site_label_2
 _geom_angle_atom_site_label_3
 _geom_angle
 _geom_angle_site_symmetry_1
 _geom_angle_site_symmetry_3
 _geom_angle_publ_flag
C28 Fe C12 88.27(7) . . ?
C28 Fe C1 102.64(8) . . ?
C12 Fe C1 138.04(7) . . ?
C28 Fe C2 86.18(7) . . ?
C12 Fe C2 172.52(7) . . ?
C1 Fe C2 39.28(7) . . ?
C28 Fe C11 109.62(7) . . ?
C12 Fe C11 40.14(6) . . ?
C1 Fe C11 98.96(6) . . ?
C2 Fe C11 138.24(6) . . ?
C28 Fe C13 104.57(7) . . ?
C12 Fe C13 39.94(6) . . ?
C1 Fe C13 152.49(7) . . ?
C2 Fe C13 146.85(7) . . ?
C11 Fe C13 68.03(6) . . ?
C28 Fe C3 103.12(7) . . ?
C12 Fe C3 147.64(6) . . ?
C1 Fe C3 69.46(7) . . ?
C2 Fe C3 39.21(7) . . ?
C11 Fe C3 147.01(6) . . ?
C13 Fe C3 107.73(6) . . ?
C28 Fe C15 148.17(7) . . ?
C12 Fe C15 64.23(6) . . ?
C1 Fe C15 89.39(6) . . ?
C2 Fe C15 119.47(6) . . ?
C11 Fe C15 38.75(6) . . ?
C13 Fe C15 65.08(6) . . ?
C3 Fe C15 108.70(6) . . ?
C28 Fe C14 142.86(7) . . ?
C12 Fe C14 64.05(6) . . ?
C1 Fe C14 114.50(6) . . ?
C2 Fe C14 123.10(6) . . ?
C11 Fe C14 65.32(6) . . ?
C13 Fe C14 38.38(6) . . ?
C3 Fe C14 90.77(6) . . ?
C15 Fe C14 37.81(6) . . ?
C2 C1 Fe 70.42(9) . . ?
C1 C2 C3 116.72(15) . . ?
C1 C2 C10 118.34(16) . . ?
C3 C2 C10 124.88(15) . . ?
C1 C2 Fe 70.29(9) . . ?
C3 C2 Fe 71.68(9) . . ?
C10 C2 Fe 125.77(11) . . ?
C2 C3 C4 125.67(14) . . ?
C2 C3 Fe 69.12(9) . . ?
C4 C3 Fe 128.71(11) . . ?
C5 C4 C9 117.35(17) . . ?
C5 C4 C3 118.20(16) . . ?
C9 C4 C3 124.45(16) . . ?
C6 C5 C4 121.43(18) . . ?
C7 C6 C5 120.32(19) . . ?
C6 C7 C8 119.16(19) . . ?
C9 C8 C7 120.9(2) . . ?
C8 C9 C4 120.78(19) . . ?
C12 C11 C15 105.20(14) . . ?
C12 C11 C20 124.75(14) . . ?
C15 C11 C20 128.42(14) . . ?
C12 C11 Fe 68.20(8) . . ?
C15 C11 Fe 74.94(9) . . ?
C20 C11 Fe 132.16(11) . . ?
C11 C12 C13 111.72(14) . . ?
C11 C12 Fe 71.67(8) . . ?
C13 C12 Fe 72.63(8) . . ?
C12 C13 C14 105.46(13) . . ?
C12 C13 C24 124.10(14) . . ?
C14 C13 C24 128.44(14) . . ?
C12 C13 Fe 67.43(8) . . ?
C14 C13 Fe 75.04(8) . . ?
C24 C13 Fe 134.01(11) . . ?
C19 C14 C13 132.48(15) . . ?
C19 C14 C15 119.13(14) . . ?
C13 C14 C15 108.40(14) . . ?
C19 C14 Fe 129.09(11) . . ?
C13 C14 Fe 66.58(8) . . ?
C15 C14 Fe 70.31(8) . . ?
C16 C15 C11 132.03(15) . . ?
C16 C15 C14 118.96(14) . . ?
C11 C15 C14 109.00(13) . . ?
C16 C15 Fe 128.03(10) . . ?
C11 C15 Fe 66.31(8) . . ?
C14 C15 Fe 71.88(8) . . ?
C17 C16 C15 119.77(15) . . ?
C16 C17 C18 121.14(15) . . ?
C19 C18 C17 121.18(16) . . ?
C18 C19 C14 119.81(15) . . ?
C11 C20 C21 110.11(14) . . ?
C11 C20 C23 113.54(14) . . ?
C21 C20 C23 107.81(14) . . ?
C11 C20 C22 107.85(13) . . ?
C21 C20 C22 108.39(14) . . ?
C23 C20 C22 109.03(14) . . ?
C26 C24 C27 107.18(18) . . ?
C26 C24 C13 113.61(14) . . ?
C27 C24 C13 110.77(14) . . ?
C26 C24 C25 109.91(19) . . ?
C27 C24 C25 107.86(17) . . ?
C13 C24 C25 107.39(13) . . ?
O C28 Fe 176.84(15) . . ?

_diffrn_measured_fraction_theta_max    0.998
_diffrn_reflns_theta_full              75.00
_diffrn_measured_fraction_theta_full   1.000
_refine_diff_density_max    0.382
_refine_diff_density_min   -0.329
_refine_diff_density_rms    0.044


#=============================================================================
#  end of cif data for "andyg81" (compound syn-9)
#=============================================================================


#=============================================================================
#  end of combined cif data
#=============================================================================
